# Supplementary material for: Efficient metal-free aminoiodination of alkenes with N-fluorobenzenesulfonimide under mild conditions
Source: Royal Society of Chemistry journal article supplement (doi:10.1039/c8ob03019g), 2019-01-01
Supplement: c8ob03019g1.pdf [file c8ob03019g1.pdf]

**Electronic Supplementary Information (ESI) for:**

**Efficient Metal-free Aminoiodination of Alkene with  
N-fluorobenzenesulfonimide under Mild Conditions**

*Bowen Lei,<sup>†</sup> Qi Miao,<sup>†</sup> Lifang Ma,<sup>†</sup> Ruoqi Fu,<sup>†</sup> Fangrong Hu,<sup>†</sup> Ni Ni,<sup>†</sup> and Ziyuan Li<sup>\*,†</sup>*

<sup>†</sup> Department of Pharmaceutical and Biological Engineering, School of Chemical Engineering, Sichuan University, No.24 South Section 1, Yihuan Road, Chengdu 610065, China

**Table of Contents**

|                                                                                                       |         |
|-------------------------------------------------------------------------------------------------------|---------|
| General Remarks                                                                                       | S2      |
| Experimental Procedure and Characterization Data                                                      | S3-S14  |
| Single Crystal X-ray Diffractometry Structures                                                        | S15     |
| Control Experiments Proving NFSI can, while<br>TEMPO cannot, oxidize I <sup>-</sup> to I <sup>+</sup> | S16-S17 |
| Gram-scale Aminoiodination of Alkene                                                                  | S18-S19 |
| Preliminary Attempt on Aminobromination of Styrene                                                    | S20     |
| <sup>1</sup> H NMR and <sup>13</sup> C NMR Spectra of Products <b>2</b> , <b>3</b> , <b>4</b>         | S21–S84 |

## **General Remarks**

All commercially available compounds were purchased from Sigma-Aldrich, TCI, Acros, J&K Chemicals and Adamas-beta. NaI (99% purity, CAS No. 7681-82-5), NFSI (98% purity, CAS No. 133745-75-2) and TEMPO (98% purity, CAS No. 2564-83-2) was purchased from Adamas-beta. 1,4-Dioxane (99%, ACS grade, CAS No. 123-91-1) were purchased from J&K Chemicals. Unless otherwise noted, materials obtained from commercial suppliers were used without further purification. Products were purified by flash chromatography on silica gel using petroleum ether, ethyl acetate and dichloromethane as the eluents.  $^1\text{H}$ -NMR spectra were recorded on Bruker AVANCE III-400 spectrometers. Chemical shifts (in ppm) were referenced with TMS in  $\text{CDCl}_3$  (0 ppm).  $^{13}\text{C}$ -NMR spectra were obtained by using the same NMR spectrometers and were calibrated with  $\text{CDCl}_3$  ( $\delta = 77.00$  ppm). High resolution mass spectra were obtained from an Agilent 6520B Q-TOF mass spectrometer with electron spray ionization (ESI) as the ion source.

## Experimental Procedure and Characterization Data

### 1) Method A: Transition-metal and additive-free aminoiodination with NaI and NFSI at 40 °C

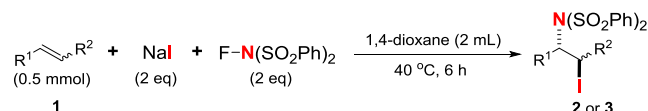

**Typical Procedure:** To a reaction tube charged with NaI (150 mg, 1 mmol) and NFSI (315 mg, 1 mmol) was added a solution of alkene (**1**, 0.5 mmol) in 1,4-dioxane (2 mL) via a syringe. The reaction mixture was stirred at 40 °C in air for 6 hours. After rapidly cooling by ice, the mixture was diluted with ethyl acetate, and concentrated *in vacuo* to give dark residue, which was then purified by flash chromatography using petroleum ether and ethyl acetate as the eluent on silical gel to afford aminoiodinated product **2** or **3**.

### 2) Method B: TEMPO-assisted aminoiodination with NaI and NFSI at 25 °C

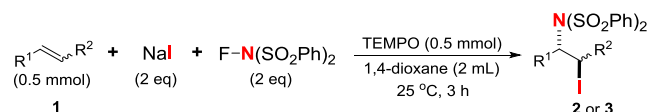

**Typical Procedure:** To a reaction tube charged with NaI (150 mg, 1 mmol) and NFSI (315 mg, 1 mmol) was added a solution of alkene (**1**, 0.5 mmol) and TEMPO (78 mg, 0.5 mmol) in 1,4-dioxane (2 mL) via a syringe. The reaction mixture was stirred at 25 °C in air for 3 hours, and then diluted with ethyl acetate, washed with water and brine, dried over Na<sub>2</sub>SO<sub>4</sub>, and concentrated *in vacuo* to give dark residue, which was then purified by flash chromatography using petroleum ether and ethyl acetate as the eluent on silical gel to afford aminoiodinated product **2** or **3**.

### 3) Characterization of the aminoiodinated product 2 and 3

#### Aminoiodination of Styrene (1a):

**Method A:** The reaction of 0.5 mmol of styrene (**1a**) with NaI (1 mmol) and NFSI (1 mmol) at 40 °C afforded 223.5 mg of **2a** (85%) after flash chromatography on silica gel using petroleum ether and ethyl acetate (15:1, v/v) as the eluent.

**Method B:** The reaction of 0.5 mmol of styrene (**1a**) with NaI (1 mmol), NFSI (1 mmol) and TEMPO (0.5 mmol) at 25 °C afforded 218.0 mg of **2a** (83%) and trace **3a** after flash chromatography on silica gel using

petroleum ether and ethyl acetate (25:1, v/v) as the eluent.

***N*-(2-Iodo-1-phenylethyl)-*N*-(phenylsulfonyl)benzenesulfonamide (2a)**

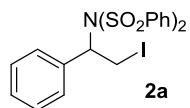 White solid, m.p. 157.0-158.8 °C. <sup>1</sup>H NMR (CDCl<sub>3</sub>, 400 MHz): δ = 7.59-7.44 (m, 11H), 7.38-7.31 (m, 4H), 5.75 (dd, *J* = 11.8 Hz, 3.0 Hz, 1H), 4.24 (dd, *J* = 11.8 Hz, 10.5 Hz, 1H), 3.11 (dd, *J* = 10.5 Hz, 3.0 Hz, 1H) ppm; <sup>13</sup>C NMR (CDCl<sub>3</sub>, 100 MHz): δ = 140.0, 133.8, 132.6, 129.9, 129.0, 128.7, 128.3, 128.1, 65.2, 1.8 ppm. HRMS *m/z* (ESI) calcd for [C<sub>20</sub>H<sub>18</sub>INO<sub>4</sub>S<sub>2</sub>+Na]<sup>+</sup> 549.9614, found 549.9623.

***N*-(2-Iodo-2-phenylethyl)-*N*-(phenylsulfonyl)benzenesulfonamide (3a)**

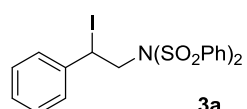 Colorless oil. <sup>1</sup>H NMR (CDCl<sub>3</sub>, 400 MHz): δ = 7.67-7.59 (m, 6H), 7.46-7.42 (m, 6H), 7.33-7.30 (m, 3H), 5.60 (dd, *J* = 11.0 Hz, 4.6 Hz, 1H), 4.89 (dd, *J* = 15.5 Hz, 11.0 Hz, 1H), 4.08 (dd, *J* = 15.5 Hz, 4.6 Hz, 1H) ppm; <sup>13</sup>C NMR (CDCl<sub>3</sub>, 100 MHz): δ = 139.9, 138.6, 133.9, 129.2, 128.9, 128.9, 128.6, 125.7, 55.6, 28.7 ppm. HRMS *m/z* (ESI) calcd for [C<sub>20</sub>H<sub>18</sub>INO<sub>4</sub>S<sub>2</sub>+K]<sup>+</sup> 565.9354, found 565.9362.

**Aminoiodination of 4-*tert*-Butylstyrene (1b):**

**Method A:** The reaction of 0.5 mmol of 4-*tert*-butylstyrene (**1b**) with NaI (1 mmol) and NFSI (1 mmol) at 40 °C afforded 235.8 mg of **2b** (81%) after flash chromatography on silica gel using petroleum ether and ethyl acetate (15:1, v/v) as the eluent.

**Method B:** The reaction of 0.5 mmol of 4-*tert*-butylstyrene (**1b**) with NaI (1 mmol), NFSI (1 mmol) and TEMPO (0.5 mmol) at 25 °C afforded 176.4 mg of **2b** (61%) after flash chromatography on silica gel using petroleum ether and ethyl acetate (25:1, v/v) as the eluent.

***N*-(1-(4-(*Tert*-butyl)phenyl)-2-iodoethyl)-*N*-(phenylsulfonyl)benzenesulfonamide (2b)**

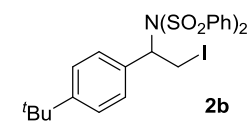 White solid, m.p. 130.3-132.0 °C. <sup>1</sup>H NMR (CDCl<sub>3</sub>, 400 MHz): δ = 8.30-7.50 (m, 6H), 7.41-6.90 (m, 8H), 5.76 (dd, *J* = 11.8 Hz, 3.0 Hz, 1H), 4.24 (dd, *J* = 11.8 Hz, 10.6 Hz, 1H), 3.12 (dd, *J* = 10.6 Hz, 3.0 Hz, 1H), 1.36 (s, 9H) ppm; <sup>13</sup>C NMR (CDCl<sub>3</sub>, 100 MHz): δ = 151.8, 140.1, 133.7, 129.5, 129.4, 128.8, 128.1, 125.1, 65.1, 34.6, 31.4, 2.1 ppm. HRMS *m/z* (ESI) calcd for [C<sub>24</sub>H<sub>26</sub>INO<sub>4</sub>S<sub>2</sub>+Na]<sup>+</sup> 606.0240, found 606.0234.

**Aminoiodination of 4-vinylphenyl acetate (1c):**

**Method A:** The reaction of 0.5 mmol of 4-vinylphenyl acetate (**1c**) with NaI (1 mmol) and NFSI (1 mmol)



at 40 °C afforded 247.3 mg of **2c** (85%) after flash chromatography on silica gel using petroleum ether and ethyl acetate (15:1, v/v) as the eluent.

**Method B:** The reaction of 0.5 mmol of 4-vinylphenyl acetate (**1c**) with NaI (1.5 mmol), NFSI (1.5 mmol) and TEMPO (0.5 mmol) at 25 °C afforded 227.5 mg of **2c** (78%) after flash chromatography on silica gel using petroleum ether and ethyl acetate (15:1, v/v) as the eluent.

**4-(2-Iodo-1-(N-(phenylsulfonyl)phenylsulfonamido)ethyl)phenyl acetate (**2c**)**

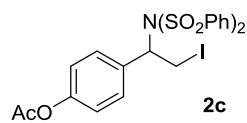 White solid, m.p. 149.1-151.3 °C. <sup>1</sup>H NMR (CDCl<sub>3</sub>, 400 MHz): δ = 8.30-7.30 (m, 12H), 7.05 (d, *J* = 8.6 Hz, 2H), 5.72 (dd, *J* = 11.8 Hz, 3.0 Hz, 1H), 4.21 (t, *J* = 11.2 Hz, 1H), 3.08 (dd, *J* = 10.6 Hz, 3.0 Hz, 1H), 2.34 (s, 3H) ppm; <sup>13</sup>C NMR (CDCl<sub>3</sub>, 100 MHz): δ = 169.2, 150.9, 139.9, 134.0, 131.1, 130.3, 129.1, 128.1, 121.7, 64.7, 21.1, 1.7 ppm. HRMS *m/z* (ESI) calcd for [C<sub>22</sub>H<sub>20</sub>INO<sub>6</sub>S<sub>2</sub>+Na]<sup>+</sup> 607.9669, found 607.9677.

**Aminoiodination of 4-vinyl-1,1'-biphenyl (**1d**):**

**Method A:** The reaction of 0.5 mmol of 4-vinyl-1,1'-biphenyl (**1d**) with NaI (1 mmol) and NFSI (1 mmol) at 40 °C afforded 240.6 mg of **2d** (80%) after flash chromatography on silica gel using petroleum ether and ethyl acetate (15:1, v/v) as the eluent.

**Method B:** The reaction of 0.5 mmol of 4-vinyl-1,1'-biphenyl (**1d**) with NaI (1.5 mmol), NFSI (1.5 mmol) and TEMPO (0.5 mmol) at 25 °C afforded 204.5 mg of **2d** (68%) after flash chromatography on silica gel using petroleum ether and ethyl acetate (15:1, v/v) as the eluent.

***N*-(1-([1,1'-biphenyl]-4-yl)-2-iodoethyl)-*N*-(phenylsulfonyl)benzenesulfonamide (**2d**)**

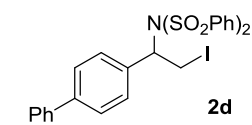 White solid, m.p. 160.1-162.1 °C. <sup>1</sup>H NMR (CDCl<sub>3</sub>, 400 MHz): δ = 8.40-7.60 (m, 7H), 7.53-7.46 (m, 8H), 7.41-7.20 (m, 4H), 5.82 (dd, *J* = 11.8 Hz, 3.0 Hz, 1H), 4.27 (t, *J* = 11.2 Hz, 1H), 3.15 (dd, *J* = 10.5 Hz, 3.0 Hz, 1H) ppm; <sup>13</sup>C NMR (CDCl<sub>3</sub>, 100 MHz): δ = 141.5, 140.3, 140.0, 133.8, 131.5, 130.4, 128.9, 128.1, 127.7, 127.1, 126.9, 65.0, 1.8 ppm. HRMS *m/z* (ESI) calcd for [C<sub>26</sub>H<sub>22</sub>INO<sub>4</sub>S<sub>2</sub>+Na]<sup>+</sup> 625.9927, found 625.9930.

**Aminoiodination of 4-fluorostyrene (**1e**):**

**Method A:** The reaction of 0.5 mmol of 4-fluorostyrene (**1e**) with NaI (1 mmol) and NFSI (1 mmol) at 40 °C afforded 181.5 mg of **2e** (67%) after flash chromatography on silica gel using petroleum ether and ethyl acetate (15:1, v/v) as the eluent.

**Method B:** The reaction of 0.5 mmol of 4-fluorostyrene (**1e**) with NaI (1 mmol), NFSI (1 mmol) and TEMPO (0.5 mmol) at 25 °C afforded 170.8 mg of **2e** (63%) after flash chromatography on silica gel using petroleum ether and ethyl acetate (25:1, v/v) as the eluent.

***N*-(1-(4-Fluorophenyl)-2-iodoethyl)-*N*-(phenylsulfonyl)benzenesulfonamide (**2e**)**

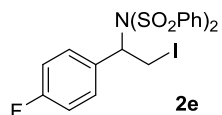

White solid, m.p. 138.1-139.5 °C. <sup>1</sup>H NMR (CDCl<sub>3</sub>, 400 MHz): δ = 8.20-7.20 (m, 12H), 7.01 (t, *J* = 8.6 Hz, 2H), 5.70 (dd, *J* = 11.9 Hz, 3.0 Hz, 1H), 4.18 (dd, *J* = 11.9 Hz, 10.6 Hz, 1H), 3.09 (dd, *J* = 10.6 Hz, 3.0 Hz, 1H) ppm; <sup>13</sup>C NMR (CDCl<sub>3</sub>, 100 MHz): δ = 162.7 (d, *J* = 247.6 Hz), 139.9, 134.0, 131.8 (d, *J* = 8.3 Hz), 129.1, 128.6 (d, *J* = 3.5 Hz), 128.0, 115.2 (d, *J* = 21.6 Hz), 64.6, 1.8 ppm. HRMS *m/z* (ESI) calcd for [C<sub>20</sub>H<sub>17</sub>FINO<sub>4</sub>S<sub>2</sub>+Na]<sup>+</sup> 567.9520, found 567.9526.

**Aminoiodination of 3-fluorostyrene (**1f**):**

**Method A:** The reaction of 0.5 mmol of 3-fluorostyrene (**1f**) with NaI (1 mmol) and NFSI (1 mmol) at 40 °C afforded 173.8 mg of **2f** (64%) after flash chromatography on silica gel using petroleum ether and ethyl acetate (15:1, v/v) as the eluent.

**Method B:** The reaction of 0.5 mmol of 3-fluorostyrene (**1f**) with NaI (1 mmol), NFSI (1 mmol) and TEMPO (0.5 mmol) at 25 °C afforded 160.1 mg of **2f** (59%) after flash chromatography on silica gel using petroleum ether and ethyl acetate (25:1, v/v) as the eluent.

***N*-(1-(3-Fluorophenyl)-2-iodoethyl)-*N*-(phenylsulfonyl)benzenesulfonamide (**2f**)**

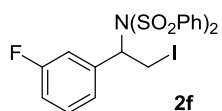

White solid, m.p. 140.1-141.6 °C. <sup>1</sup>H NMR (CDCl<sub>3</sub>, 400 MHz): δ = 8.40-7.40 (m, 10H), 7.33-7.25 (m, 2H), 7.19-7.16 (m, 1H), 7.08-7.03 (m, 1H), 5.69 (dd, *J* = 11.8 Hz, 3.0 Hz, 1H), 4.16 (dd, *J* = 11.8 Hz, 10.6 Hz, 1H), 3.09 (dd, *J* = 10.6 Hz, 3.0 Hz, 1H) ppm; <sup>13</sup>C NMR (CDCl<sub>3</sub>, 100 MHz): δ = 162.6 (d, *J* = 245.4 Hz), 139.8, 135.3 (d, *J* = 7.3 Hz), 134.1, 129.7 (d, *J* = 8.0 Hz), 129.1, 128.0, 125.5 (d, *J* = 2.9 Hz), 117.0 (d, *J* = 22.6 Hz), 115.7 (d, *J* = 21.0 Hz), 64.6 (d, *J* = 1.2 Hz), 1.4 ppm. HRMS *m/z* (ESI) calcd for [C<sub>20</sub>H<sub>17</sub>FINO<sub>4</sub>S<sub>2</sub>+Na]<sup>+</sup> 567.9520, found 567.9521.

**Aminoiodination of 4-chlorostyrene (**1g**):**

**Method A:** The reaction of 0.5 mmol of 4-chlorostyrene (**1g**) with NaI (1 mmol) and NFSI (1 mmol) at 40 °C afforded 226.2 mg of **2g** (81%) after flash chromatography on silica gel using petroleum ether and ethyl acetate (15:1, v/v) as the eluent.

**Method B:** The reaction of 0.5 mmol of 4-chlorostyrene (**1g**) with NaI (1 mmol), NFSI (1 mmol) and

TEMPO (0.5 mmol) at 25 °C afforded 192.7 mg of **2g** (69%) after flash chromatography on silica gel using petroleum ether and ethyl acetate (25:1, v/v) as the eluent.

***N*-(1-(4-Chlorophenyl)-2-iodoethyl)-*N*-(phenylsulfonyl)benzenesulfonamide (**2g**)**

White solid, m.p. 131.2-132.8 °C. <sup>1</sup>H NMR (CDCl<sub>3</sub>, 400 MHz): δ = 8.30-7.39 (m, 12H), 7.28 (d, *J* = 8.6 Hz, 2H), 5.69 (dd, *J* = 11.8 Hz, 3.0 Hz, 1H), 4.16 (dd, *J* = 11.8 Hz, 10.6 Hz, 1H), 3.08 (dd, *J* = 10.6 Hz, 3.0 Hz, 1H)

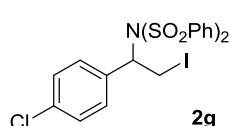

ppm; <sup>13</sup>C NMR (CDCl<sub>3</sub>, 100 MHz): δ = 139.8, 134.7, 134.0, 131.3, 131.3, 129.1, 128.4, 128.0, 64.5, 1.4 ppm. HRMS *m/z* (ESI) calcd for [C<sub>20</sub>H<sub>17</sub>ClINO<sub>4</sub>S<sub>2</sub>+Na]<sup>+</sup> 583.9224, found 583.9224.

**Aminoiodination of 3-chlorostyrene (**1h**):**

**Method A:** The reaction of 0.5 mmol of 3-chlorostyrene (**1h**) with NaI (1 mmol) and NFSI (1 mmol) at 40 °C afforded 212.7 mg of **2h** (76%) after flash chromatography on silica gel using petroleum ether and ethyl acetate (15:1, v/v) as the eluent.

**Method B:** The reaction of 0.5 mmol of 3-chlorostyrene (**1h**) with NaI (1.5 mmol), NFSI (1.5 mmol) and TEMPO (0.5 mmol) at 25 °C afforded 184.4 mg of **2h** (66%) after flash chromatography on silica gel using petroleum ether and ethyl acetate (25:1, v/v) as the eluent.

***N*-(1-(3-Chlorophenyl)-2-iodoethyl)-*N*-(phenylsulfonyl)benzenesulfonamide (**2h**)**

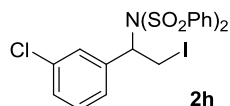

White solid, m.p. 157.6-159.2 °C. <sup>1</sup>H NMR (CDCl<sub>3</sub>, 400 MHz): δ = 8.20-7.37 (m, 12H), 7.33-7.24 (m, 2H), 5.68 (dd, *J* = 11.8 Hz, 3.0 Hz, 1H), 4.15 (t, *J* = 11.2 Hz, 1H), 3.10 (dd, *J* = 10.6 Hz, 3.0 Hz, 1H) ppm; <sup>13</sup>C NMR (CDCl<sub>3</sub>, 100 MHz): δ = 139.7, 134.7, 134.3, 134.1, 130.1, 129.5, 129.0, 128.8, 128.0, 127.8, 64.4, 1.3 ppm. HRMS *m/z* (ESI) calcd for [C<sub>20</sub>H<sub>17</sub>ClINO<sub>4</sub>S<sub>2</sub>+Na]<sup>+</sup> 583.9224, found 583.9229.

**Aminoiodination of 2-chlorostyrene (**1i**):**

**Method A:** The reaction of 0.5 mmol of 2-chlorostyrene (**1i**) with NaI (1 mmol) and NFSI (1 mmol) at 40 °C afforded 156.6 mg of **2i** (56%) after flash chromatography on silica gel using petroleum ether and ethyl acetate (15:1, v/v) as the eluent.

**Method B:** The reaction of 0.5 mmol of 2-chlorostyrene (**1i**) with NaI (1.5 mmol), NFSI (1.5 mmol) and TEMPO (0.5 mmol) at 25 °C afforded 153.5 mg of **2i** (55%) after flash chromatography on silica gel using petroleum ether and ethyl acetate (25:1, v/v) as the eluent.

***N*-(1-(2-Chlorophenyl)-2-iodoethyl)-*N*-(phenylsulfonyl)benzenesulfonamide (**2i**)**

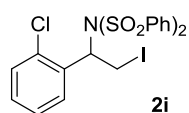

**2i**

White solid, m.p. 197.1-198.7 °C. <sup>1</sup>H NMR (CDCl<sub>3</sub>, 400 MHz): δ = 7.90-7.70 (m, 4H), 7.61-7.52 (m, 3H), 7.38-7.28 (m, 5H), 7.14-7.10 (m, 1H), 6.85-6.83 (m, 1H), 6.19 (dd, *J* = 12.0 Hz, 3.8 Hz, 1H), 4.15 (dd, *J* = 12.0 Hz, 10.6, 1H), 3.80 (dd, *J* = 10.6 Hz, 3.8 Hz, 1H) ppm; <sup>13</sup>C NMR (CDCl<sub>3</sub>, 100 MHz): δ = 140.0, 136.8, 133.5, 132.6, 130.3, 129.7, 128.7, 128.6, 128.0, 126.9, 61.5, 2.5 ppm. HRMS *m/z* (ESI) calcd for [C<sub>20</sub>H<sub>17</sub>ClINO<sub>4</sub>S<sub>2</sub>+Na]<sup>+</sup> 583.9224, found 583.9232.

**Aminoiodination of 4-bromostyrene (**1j**):**

**Method A:** The reaction of 0.5 mmol of 4-bromostyrene (**1j**) with NaI (1 mmol) and NFSI (1 mmol) at 40 °C afforded 238.1 mg of **2j** (79%) after flash chromatography on silica gel using petroleum ether and ethyl acetate (15:1, v/v) as the eluent.

**Method B:** The reaction of 0.5 mmol of 4-bromostyrene (**1j**) with NaI (1 mmol), NFSI (1 mmol) and TEMPO (0.5 mmol) at 25 °C afforded 201.8 mg of **2j** (67%) after flash chromatography on silica gel using petroleum ether and ethyl acetate (25:1, v/v) as the eluent.

***N*-(1-(4-Bromophenyl)-2-iodoethyl)-*N*-(phenylsulfonyl)benzenesulfonamide (**2j**)**

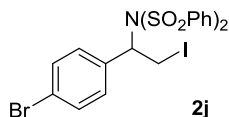

**2j**

White solid, m.p. 148.5-149.8 °C. <sup>1</sup>H NMR (CDCl<sub>3</sub>, 400 MHz): δ = 8.20-7.42 (m, 11H), 7.34-7.20 (m, 3H), 5.67 (dd, *J* = 11.8 Hz, 3.0 Hz, 1H), 4.16 (dd, *J* = 11.8 Hz, 10.6 Hz, 1H), 3.08 (dd, *J* = 10.6 Hz, 3.0 Hz, 1H) ppm; <sup>13</sup>C NMR (CDCl<sub>3</sub>, 100 MHz): δ = 139.8, 134.0, 131.8, 131.6, 131.41, 129.1, 128.0, 122.9, 64.5, 1.4 ppm. HRMS *m/z* (ESI) calcd for [C<sub>20</sub>H<sub>17</sub>BrINO<sub>4</sub>S<sub>2</sub>+Na]<sup>+</sup> 627.8719, found 627.8730.

**Aminoiodination of 2-vinylnaphthalene (**1k**):**

**Method A:** The reaction of 0.5 mmol of 2-vinylnaphthalene (**1k**) with NaI (1 mmol) and NFSI (1 mmol) at 40 °C afforded 236.7 mg of **2k** (82%) after flash chromatography on silica gel using petroleum ether and ethyl acetate (15:1, v/v) as the eluent.

***N*-(2-Iodo-1-(naphthalen-2-yl)ethyl)-*N*-(phenylsulfonyl)benzenesulfonamide (**2k**)**

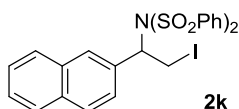

**2k**

Colorless oil. <sup>1</sup>H NMR (CDCl<sub>3</sub>, 400 MHz): δ = 7.91-7.80 (m, 5H), 7.70 (d, *J* = 8.6 Hz, 1H), 7.55-7.00 (m, 11H), 5.94 (dd, *J* = 11.8 Hz, 3.0 Hz, 1H), 4.37 (dd, *J* = 11.8 Hz, 10.6 Hz, 1H), 3.22 (dd, *J* = 10.6 Hz, 3.0 Hz, 1H) ppm; <sup>13</sup>C NMR (CDCl<sub>3</sub>, 100 MHz): δ = 139.9, 133.8, 133.1, 132.7, 129.7, 129.4, 128.9, 128.4, 128.0, 127.9, 127.4, 127.1, 126.8, 126.4, 65.3, 1.9 ppm. HRMS *m/z* (ESI)

calcd for  $[\text{C}_{24}\text{H}_{20}\text{INO}_4\text{S}_2+\text{Na}]^+$  599.9771, found 599.9764.

**Aminoiodination of allylbenzene (1l):**

**Method A:** The reaction of 0.5 mmol of allylbenzene (**1l**) with NaI (1 mmol) and NFSI (1 mmol) at 40 °C afforded 211.3 mg of **3l** (78%) after flash chromatography on silica gel using petroleum ether and ethyl acetate (15:1, v/v) as the eluent.

**Method B:** The reaction of 0.5 mmol of allylbenzene (**1l**) with NaI (1 mmol), NFSI (1 mmol) and TEMPO (0.5 mmol) at 25 °C afforded 39.3 mg of **2l** (14.5%) and 181.8 mg of **3l** (67.2%) after flash chromatography on silica gel using petroleum ether and ethyl acetate (25:1, v/v) as the eluent.

**N-(1-Iodo-3-phenylpropan-2-yl)-N-(phenylsulfonyl)benzenesulfonamide (2l)**

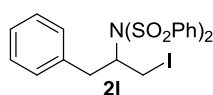

Colorless oil.  $^1\text{H}$  NMR ( $\text{CDCl}_3$ , 400 MHz):  $\delta$  = 8.20-7.80 (m, 4H), 7.66-7.63 (m, 2H), 7.56-7.52 (m, 4H), 7.25-7.22 (m, 3H), 7.11-7.09 (m, 2H), 4.55-4.48 (m, 1H), 3.66 (dd,  $J$  = 10.7 Hz, 7.8 Hz, 1H), 3.48-3.40 (m, 2H), 3.27 (dd,  $J$  = 14.0 Hz, 5.7 Hz, 1H) ppm;  $^{13}\text{C}$  NMR ( $\text{CDCl}_3$ , 100 MHz):  $\delta$  = 137.1, 134.1, 134.0, 129.1, 129.1, 128.9, 128.8, 127.1, 67.0, 40.0, 4.3 ppm. HRMS  $m/z$  (ESI) calcd for  $[\text{C}_{21}\text{H}_{20}\text{INO}_4\text{S}_2+\text{Na}]^+$  563.9771, found 563.9763.

**N-(2-Iodo-3-phenylpropyl)-N-(phenylsulfonyl)benzenesulfonamide (3l)**

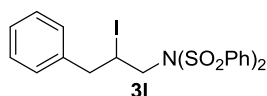

White solid, m.p. 114.0-115.8 °C.  $^1\text{H}$  NMR ( $\text{CDCl}_3$ , 400 MHz):  $\delta$  = 8.02-8.00 (m, 4H), 7.67 (t,  $J$  = 7.5 Hz, 2H), 7.54 (t,  $J$  = 7.8 Hz, 4H), 7.27-7.24 (m, 3H), 6.94-6.92 (m, 2H), 4.51-4.44 (m, 1H), 4.35 (dd,  $J$  = 15.1 Hz, 5.6 Hz, 1H), 4.19 (dd,  $J$  = 15.1 Hz, 9.8 Hz, 1H), 3.22 (dd,  $J$  = 14.8 Hz, 4.2 Hz, 1H), 2.94 (dd,  $J$  = 14.8 Hz, 11.0 Hz, 1H) ppm;  $^{13}\text{C}$  NMR ( $\text{CDCl}_3$ , 100 MHz):  $\delta$  = 139.2, 139.0, 134.2, 129.2, 128.7, 128.4, 128.4, 126.9, 56.2, 42.9, 31.9 ppm. HRMS  $m/z$  (ESI) calcd for  $[\text{C}_{21}\text{H}_{20}\text{INO}_4\text{S}_2+\text{Na}]^+$  563.9771, found 563.9778.

**Aminoiodination of vinylcyclohexane (1m):**

**Method A:** The reaction of 0.5 mmol of vinylcyclohexane (**1m**) with NaI (1 mmol) and NFSI (1 mmol) at 40 °C afforded 51.2 mg of **2m** (19.2%) and 175.2 mg of **3m** (65.7%) after flash chromatography on silica gel using petroleum ether and ethyl acetate (25:1, v/v) as the eluent.

**Method B:** The reaction of 0.5 mmol of vinylcyclohexane (**1m**) with NaI (1 mmol), NFSI (1 mmol) and TEMPO (0.5 mmol) at 25 °C afforded 196.3 mg of **3m** (74%) after flash chromatography on silica gel using petroleum ether and ethyl acetate (25:1, v/v) as the eluent.

***N*-(1-Cyclohexyl-2-iodoethyl)-*N*-(phenylsulfonyl)benzenesulfonamide (**2m**)**

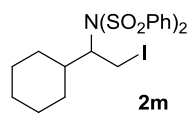 White solid, m.p. 176.1-177.7 °C. <sup>1</sup>H NMR (CDCl<sub>3</sub>, 400 MHz): δ = 8.16-8.11 (m, 4H), 7.70-7.54 (m, 6H), 4.39-4.34 (m, 1H), 3.54 (dd, *J* = 11.3 Hz, 7.2 Hz, 1H), 3.30 (dd, *J* = 11.3 Hz, 3.2 Hz, 1H), 2.15-2.07 (m, 2H), 1.85-1.82 (m, 1H), 1.65-1.45 (m, 3H), 1.26-1.09 (m, 3H), 0.95-0.89 (m, 2H) ppm; <sup>13</sup>C NMR (CDCl<sub>3</sub>, 100 MHz): δ = 140.7, 139.5, 134.1, 133.8, 129.2, 128.9, 128.8, 128.7, 71.1, 42.4, 31.9, 31.7, 26.6, 25.8, 25.5, 4.8 ppm. HRMS *m/z* (ESI) calcd for [C<sub>20</sub>H<sub>24</sub>INO<sub>4</sub>S<sub>2</sub>+Na]<sup>+</sup> 556.0084, found 556.0086.

***N*-(2-Cyclohexyl-2-iodoethyl)-*N*-(phenylsulfonyl)benzenesulfonamide (**3m**)**

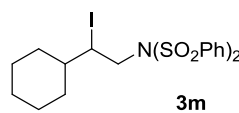 White solid, m.p. 121.8-123.2 °C. <sup>1</sup>H NMR (CDCl<sub>3</sub>, 400 MHz): δ = 8.04-8.02 (m, 4H), 7.66 (t, *J* = 7.5 Hz, 2H), 7.56 (t, *J* = 7.5 Hz, 4H), 4.44-4.40 (m, 1H), 4.24-4.10 (m, 2H), 1.86-1.60 (m, 4H), 1.29-1.02 (m, 6H), 0.61-0.58 (m, 1H) ppm; <sup>13</sup>C NMR (CDCl<sub>3</sub>, 100 MHz): δ = 139.5, 134.1, 129.1, 128.2, 53.8, 41.7, 38.6, 33.5, 30.4, 26.0, 25.8, 25.3 ppm. HRMS *m/z* (ESI) calcd for [C<sub>20</sub>H<sub>24</sub>INO<sub>4</sub>S<sub>2</sub>+Na]<sup>+</sup> 556.0084, found 556.0087.

**Aminoiodination of cyclohexene (**1n**):**

**Method A:** The reaction of 0.5 mmol of cyclohexene (**1n**) with NaI (1 mmol) and NFSI (1 mmol) at 40 °C afforded 193.7 mg of **2n** (77%) after flash chromatography on silica gel using petroleum ether and ethyl acetate (15:1, v/v) as the eluent.

**Method B:** The reaction of 0.5 mmol of cyclohexene (**1n**) with NaI (1 mmol), NFSI (1 mmol) and TEMPO (0.5 mmol) at 25 °C afforded 191.4 mg of **2n** (76%) after flash chromatography on silica gel using petroleum ether and ethyl acetate (25:1, v/v) as the eluent.

***N*-(*trans*-2-Iodocyclohexyl)-*N*-(phenylsulfonyl)benzenesulfonamide (**2n**)**

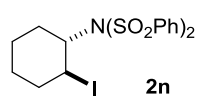 White solid, m.p. 164.7-166.3 °C. <sup>1</sup>H NMR (CDCl<sub>3</sub>, 400 MHz): δ = 8.25 (s, 2H), 7.93 (s, 2H), 7.70-7.50 (m, 6H), 4.96-4.89 (m, 1H), 4.04-3.97 (m, 1H), 2.66-2.62 (m, 1H), 2.31-2.21 (m, 1H), 2.04-1.77 (m, 3H), 1.51-1.48 (m, 1H), 1.32-1.26 (m, 2H) ppm; <sup>13</sup>C NMR (CDCl<sub>3</sub>, 100 MHz): δ = 141.3, 138.5, 134.2, 133.8, 129.4, 129.0, 128.5, 128.2, 70.4, 42.0, 32.8, 30.8, 28.0, 26.2 ppm. HRMS *m/z* (ESI) calcd for [C<sub>18</sub>H<sub>20</sub>INO<sub>4</sub>S<sub>2</sub>+Na]<sup>+</sup> 527.9771, found 527.9775.

**Aminoiodination of cyclopentene (**1o**):**

**Method A:** The reaction of 0.5 mmol of cyclopentene (**1o**) with NaI (1 mmol) and NFSI (1 mmol) at 40 °C

afforded 173.4 mg of **2o** (71%) after flash chromatography on silica gel using petroleum ether and ethyl acetate (15:1, v/v) as the eluent.

**Method B:** The reaction of 0.5 mmol of cyclopentene (**1o**) with NaI (1 mmol), NFSI (1 mmol) and TEMPO (0.5 mmol) at 25 °C afforded 175.8 mg of **2o** (72%) after flash chromatography on silica gel using petroleum ether and ethyl acetate (25:1, v/v) as the eluent.

***N*-(*trans*-2-Iodocyclopentyl)-*N*-(phenylsulfonyl)benzenesulfonamide (**2o**)**

 **2o** White solid, m.p. 162.2-163.5 °C. <sup>1</sup>H NMR (CDCl<sub>3</sub>, 400 MHz): δ = 8.08-8.05 (m, 4H), 7.66 (t, *J* = 7.4 Hz, 2H), 7.58-7.54 (m, 4H), 4.84-4.78 (m, 1H), 4.55 (dd, *J* = 17.7 Hz, 8.8 Hz, 1H), 2.45-2.37 (m, 1H), 2.10-1.93 (m, 2H), 1.85-1.76 (m, 1H), 1.69-1.60 (m, 2H) ppm; <sup>13</sup>C NMR (CDCl<sub>3</sub>, 100 MHz): δ = 140.0, 134.0, 129.0, 128.5, 72.5, 38.2, 29.1, 24.3, 23.3 ppm. HRMS *m/z* (ESI) calcd for [C<sub>17</sub>H<sub>18</sub>INO<sub>4</sub>S<sub>2</sub>+Na]<sup>+</sup> 513.9614, found 513.9622.

**Aminoiodination of (*E*)-3-hexene (**1p**):**

**Method A:** The reaction of 0.5 mmol of (*E*)-3-hexene (**1p**) with NaI (1 mmol) and NFSI (1 mmol) at 40 °C afforded 163.8 mg of **2p** (65%) after flash chromatography on silica gel using petroleum ether and ethyl acetate (15:1, v/v) as the eluent.

**Method B:** The reaction of 0.5 mmol of (*E*)-3-hexene (**1p**) with NaI (1 mmol), NFSI (1 mmol) and TEMPO (0.5 mmol) at 25 °C afforded 184.6 mg of **2p** (73%) after flash chromatography on silica gel using petroleum ether and ethyl acetate (25:1, v/v) as the eluent.

***N*-((3*S*,4*R*)- or (3*R*,4*S*)-4-Iodohexan-3-yl)-*N*-(phenylsulfonyl)benzenesulfonamide (**2p**)**

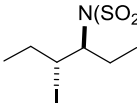 **2p** Colorless oil. <sup>1</sup>H NMR (CDCl<sub>3</sub>, 400 MHz): δ = 8.12-8.08 (m, 4H), 7.68-7.53 (m, 2H), 7.59-7.54 (m, 4H), 4.38 (td, *J* = 10.2 Hz, 3.2 Hz, 1H), 4.31-4.25 (m, 1H), 2.58-2.49 (m, 1H), 2.11-2.01 (m, 1H), 1.58-1.50 (m, 1H), 0.84 (t, *J* = 7.0 Hz, 3H), 0.79-0.75 (m, 1H), 0.70 (t, *J* = 7.4 Hz, 3H) ppm; <sup>13</sup>C NMR (CDCl<sub>3</sub>, 100 MHz): δ = 140.8, 138.8, 134.2, 133.9, 129.1, 129.0, 128.9, 128.7, 71.9, 44.47, 30.0, 26.4, 15.0, 11.7 ppm. HRMS *m/z* (ESI) calcd for [C<sub>18</sub>H<sub>22</sub>INO<sub>4</sub>S<sub>2</sub>+K]<sup>+</sup> 545.9667, found 545.9671.

**Aminoiodination of (*Z*)-3-hexene (**1q**):**

**Method A:** The reaction of 0.5 mmol of (*Z*)-3-hexene (**1q**) with NaI (1 mmol) and NFSI (1 mmol) at 40 °C afforded 186.7 mg of **2q** (74%) after flash chromatography on silica gel using petroleum ether and ethyl acetate (15:1, v/v) as the eluent.

**Method B:** The reaction of 0.5 mmol of (*Z*)-3-hexene (**1q**) with NaI (1 mmol), NFSI (1 mmol) and TEMPO (0.5 mmol) at 25 °C afforded 199.7 mg of **2q** (79%) after flash chromatography on silica gel using petroleum ether and ethyl acetate (25:1, v/v) as the eluent.

***N*-((3*S*,4*S*)- or (3*R*,4*R*)-4-Iodohexan-3-yl)-*N*-(phenylsulfonyl)benzenesulfonamide (**2q**)**

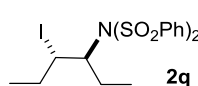 Colorless oil. <sup>1</sup>H NMR (CDCl<sub>3</sub>, 400 MHz): δ = 8.12-8.07 (m, 4H), 7.64 (t, *J* = 7.4 Hz, 2H), 7.54 (t, *J* = 7.6 Hz, 4H), 4.61-4.56 (m, 1H), 4.41-4.36 (m, 1H), 2.16-1.97 (m, 3H), 1.74-1.66 (m, 1H), 1.05 (t, *J* = 7.1 Hz, 3H), 0.71 (t, *J* = 7.4 Hz, 3H) ppm; <sup>13</sup>C NMR (CDCl<sub>3</sub>, 100 MHz): δ = 141.3, 138.7, 134.1, 133.8, 133.7, 129.3, 129.0, 128.7, 72.3, 42.1, 30.1, 23.6, 14.8, 12.2 ppm. HRMS *m/z* (ESI) calcd for [C<sub>18</sub>H<sub>22</sub>INO<sub>4</sub>S<sub>2</sub>+Na]<sup>+</sup> 529.9927, found 529.9932.

**Aminoiodination of (*E*)-4-octene (**1r**):**

**Method A:** The reaction of 0.5 mmol of (*E*)-4-octene (**1r**) with NaI (1 mmol) and NFSI (1 mmol) at 40 °C afforded 122.3 mg of **2r** (46%) after flash chromatography on silica gel using petroleum ether and ethyl acetate (15:1, v/v) as the eluent.

**Method B:** The reaction of 0.5 mmol of (*E*)-4-octene (**1r**) with NaI (1 mmol), NFSI (1 mmol) and TEMPO (0.5 mmol) at 25 °C afforded 154.6 mg of **2r** (58%) after flash chromatography on silica gel using petroleum ether and ethyl acetate (25:1, v/v) as the eluent.

***N*-((4*S*,5*R*)- or (4*R*, 5*S*)-5-Iodoctan-4-yl)-*N*-(phenylsulfonyl)benzenesulfonamide (**2r**)**

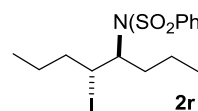 Colorless oil. <sup>1</sup>H NMR (CDCl<sub>3</sub>, 400 MHz): δ = 8.15-8.11 (m, 4H), 7.70-7.64 (m, 2H), 7.61-7.55 (m, 4H), 4.44 (td, *J* = 10.3 Hz, 2.8 Hz, 1H), 4.35-4.29 (m, 1H), 2.45-2.35 (m, 1H), 2.06-2.01 (m, 1H), 1.45-1.26 (m, 3H), 1.14-1.03 (m, 2H), 0.75 (t, *J* = 7.3 Hz, 3H), 0.63 (t, *J* = 7.3 Hz, 3H), 0.60-0.50 (m, 1H) ppm; <sup>13</sup>C NMR (CDCl<sub>3</sub>, 100 MHz): δ = 141.1, 138.9, 134.2, 133.8, 129.2, 129.1, 128.8, 128.8, 70.7, 42.4, 38.6, 34.7, 23.3, 20.1, 13.4, 12.8 ppm. HRMS *m/z* (ESI) calcd for [C<sub>20</sub>H<sub>26</sub>INO<sub>4</sub>S<sub>2</sub>+NH<sub>4</sub>]<sup>+</sup> 553.0686, found 553.0688.

**Aminoiodination of (*Z*)-4-octene (**1s**):**

**Method A:** The reaction of 0.5 mmol of (*Z*)-4-octene (**1s**) with NaI (1 mmol) and NFSI (1 mmol) at 40 °C afforded 151.4 mg of **2s** (57%) after flash chromatography on silica gel using petroleum ether and ethyl acetate (15:1, v/v) as the eluent.

**Method B:** The reaction of 0.5 mmol of (*Z*)-4-octene (**1s**) with NaI (1 mmol), NFSI (1 mmol) and TEMPO



(0.5 mmol) at 25 °C afforded 207.8 mg of **2s** (78%) after flash chromatography on silica gel using petroleum ether and ethyl acetate (25:1, v/v) as the eluent.

***N*-((4*S*,5*S*)- or (4*R*, 5*R*)-5-Iodoctan-4-yl)-*N*-(phenylsulfonyl)benzenesulfonamide (**2s**)**

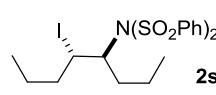 **2s** Colorless oil. <sup>1</sup>H NMR (CDCl<sub>3</sub>, 400 MHz): δ = 8.20-8.00 (m, 4H), 7.65 (t, *J* = 7.4 Hz, 2H), 7.54 (t, *J* = 7.7 Hz, 4H), 4.57-4.44 (m, 2H), 2.06-2.00 (m, 1H), 1.94-1.83 (m, 2H), 1.73-1.58 (m, 2H), 1.40-1.31 (m, 1H), 1.13-1.08 (m, 2H), 0.91 (t, *J* = 7.3 Hz, 3H), 0.72 (t, *J* = 7.3 Hz, 3H) ppm; <sup>13</sup>C NMR (CDCl<sub>3</sub>, 100 MHz): δ = 141.4, 138.9, 134.1, 133.7, 129.4, 128.8, 128.8, 128.7, 71.1, 40.0, 38.8, 32.7, 23.5, 21.1, 13.7, 13.0 ppm. HRMS *m/z* (ESI) calcd for [C<sub>20</sub>H<sub>26</sub>INO<sub>4</sub>S<sub>2</sub>+Na]<sup>+</sup> 558.0240, found 558.0248.

**Aminoiodination of 2-vinylisoindoline-1,3-dione (**1t**):**

**Method A:** The reaction of 0.5 mmol of 2-vinylisoindoline-1,3-dione (**1t**) with NaI (1 mmol) and NFSI (1 mmol) at 40 °C afforded 213.8 mg of **2t** (72%) after flash chromatography on silica gel using petroleum ether and ethyl acetate (10:1 to 6:1, v/v) as the eluent.

**Method B:** The reaction of 0.5 mmol of 2-vinylisoindoline-1,3-dione (**1t**) with NaI (1.5 mmol), NFSI (1.5 mmol) and TEMPO (0.5 mmol) at 25 °C afforded 127.5 mg of **2t** (43%) after flash chromatography on silica gel using petroleum ether and ethyl acetate (10:1 to 6:1, v/v) as the eluent.

***N*-(1-(1,3-Dioxoisindolin-2-yl)-2-iodoethyl)-*N*-(phenylsulfonyl)benzenesulfonamide (**2t**)**

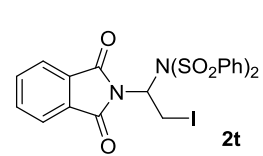 **2t** White solid, m.p. 199.6-201.5 °C. <sup>1</sup>H NMR (CDCl<sub>3</sub>, 400 MHz): δ = 8.16-8.14 (m, 4H), 7.80 (dd, *J* = 5.5 Hz, 3.0 Hz, 2H), 7.73 (dd, *J* = 5.5 Hz, 3.0 Hz, 2H), 7.59-7.47 (m, 6H), 6.74 (dd, *J* = 12.4 Hz, 4.1 Hz, 1H), 4.75 (dd, *J* = 12.4 Hz, 10.0 Hz, 1H), 3.51 (dd, *J* = 12.4 Hz, 4.1 Hz, 1H) ppm; <sup>13</sup>C NMR (CDCl<sub>3</sub>, 100 MHz): δ = 166.9, 140.1, 134.6, 134.1, 131.0, 129.1, 128.9, 128.7, 127.8, 123.8, 68.2, 1.6 ppm. HRMS *m/z* (ESI) calcd for [C<sub>22</sub>H<sub>17</sub>IN<sub>2</sub>O<sub>6</sub>S<sub>2</sub>+Na]<sup>+</sup> 618.9465, found 618.9472.

**Aminoiodination of vinyl benzoate (**1u**):**

**Method A:** The reaction of 0.5 mmol of vinyl benzoate (**1u**) with NaI (1 mmol) and NFSI (1 mmol) at 40 °C afforded 244.6 mg of **2u** (86%) after flash chromatography on silica gel using petroleum ether and ethyl acetate (15:1 to 10:1, v/v) as the eluent.

**Method B:** The reaction of 0.5 mmol of vinyl benzoate (**1u**) with NaI (1 mmol), NFSI (1 mmol) and TEMPO (0.5 mmol) at 25 °C afforded 218.9 mg of **2u** (77%) after flash chromatography on silica gel using

petroleum ether and ethyl acetate (10:1, v/v) as the eluent.

**2-Iodo-1-(*N*-(phenylsulfonyl)phenylsulfonamido)ethyl benzoate (2u)**

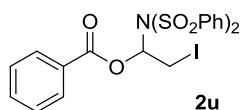

White solid, m.p. 116.7-118.2 °C. <sup>1</sup>H NMR (CDCl<sub>3</sub>, 400 MHz): δ = 8.05 (d, *J* = 0.76 Hz, 4H), 7.83-7.81 (m, 2H), 7.59-7.51 (m, 3H), 7.44-7.37 (m, 6H), 7.07 (t, *J* = 7.1 Hz, 1H), 4.00 (dd, *J* = 10.6 Hz, 7.7 Hz, 1H), 3.86 (dd, *J* = 10.6 Hz, 6.6 Hz, 1H) ppm; <sup>13</sup>C NMR (CDCl<sub>3</sub>, 100 MHz): δ = 164.0, 139.5, 134.1, 133.8, 130.0, 129.0, 128.7, 128.4, 127.9, 82.9, 2.2 ppm. HRMS *m/z* (ESI) calcd for [C<sub>21</sub>H<sub>18</sub>INO<sub>6</sub>S<sub>2</sub>+Na]<sup>+</sup> 593.9512, found 593.9518.

**Aminiodination of trimethyl(vinyl)silane (1v):**

**Method A:** The reaction of 0.5 mmol of trimethyl(vinyl)silane (**1v**) with NaI (1 mmol) and NFSI (1 mmol) at 40 °C afforded 174.3 mg of **3v** (67%) after flash chromatography on silica gel using petroleum ether and ethyl acetate (15:1, v/v) as the eluent.

**Method B:** The reaction of 0.5 mmol of trimethyl(vinyl)silane (**1v**) with NaI (1 mmol), NFSI (1 mmol) and TEMPO (0.5 mmol) at 25 °C afforded 208.4 mg of **3v** (80%) after flash chromatography on silica gel using petroleum ether and ethyl acetate (25:1, v/v) as the eluent.

***N*-(2-Iodo-2-(trimethylsilyl)ethyl)-*N*-(phenylsulfonyl)benzenesulfonamide (3v)**

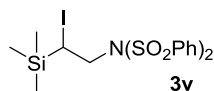

White solid, m.p. 119.8-121.4 °C. <sup>1</sup>H NMR (CDCl<sub>3</sub>, 400 MHz): δ = 8.09-8.07 (m, 4H), 7.68-7.64 (m, 2H), 7.58-7.54 (m, 4H), 4.18 (dd, *J* = 15.5 Hz, 11.7, 1H), 3.93 (dd, *J* = 15.5 Hz, 3.8 Hz, 1H), 3.55 (dd, *J* = 11.7 Hz, 3.8 Hz, 1H), 0.19 (s, 9H) ppm; <sup>13</sup>C NMR (CDCl<sub>3</sub>, 100 MHz): δ = 139.6, 134.0, 129.0, 128.6, 52.9, 15.5, -2.0 ppm. HRMS *m/z* (ESI) calcd for [C<sub>17</sub>H<sub>22</sub>INO<sub>4</sub>S<sub>2</sub>Si+K]<sup>+</sup> 561.9436, found 561.9434.

## Single Crystal X-ray Diffractometry Structure of 2n

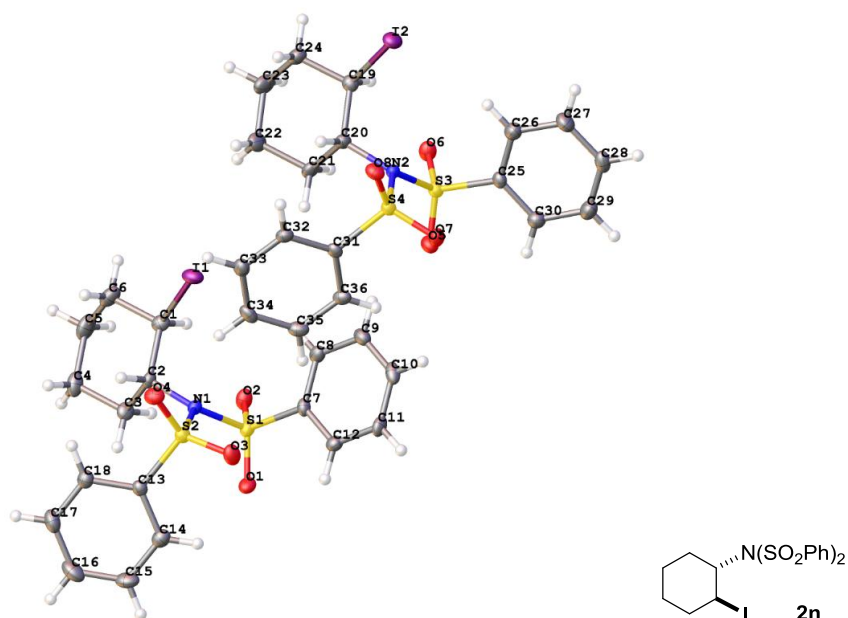

CCDC Deposition Number: 1857005

**Figure S1.** Single crystal X-ray diffractometry structure of 2n

## Control Experiments

### 1) Control experiments proving NFSI can oxidize I<sup>-</sup> to I<sup>+</sup>

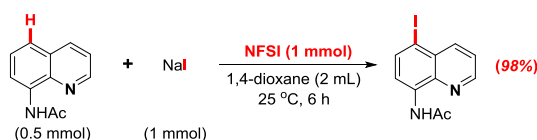

**Typical Procedure:** To a reaction tube charged with NaI (150 mg, 1 mmol) and NFSI (315 mg, 1 mmol) was added a solution of *N*-(quinolin-8-yl)acetamide (93 mg, 0.5 mmol) in 1,4-dioxane (2 mL) via a syringe. The reaction mixture was stirred at 25 °C in air for 6 hours. After diluted with ethyl acetate, the reaction mixture was concentrated *in vacuo* to give dark residue, which was then purified by flash chromatography using petroleum ether and ethyl acetate (6:1, v/v) as the eluent on silical gel to afford the C5-iodinated product 152.7 mg (98%). White solid, m.p. 144.3-145.6 °C. <sup>1</sup>H NMR (CDCl<sub>3</sub>, 400 MHz): δ = 9.77 (s, 1H), 8.75 (dd, *J* = 4.2 Hz, 1.5 Hz, 1H), 8.52 (d, *J* = 8.3 Hz, 1H), 8.34 (dd, *J* = 8.5 Hz, 1.5 Hz, 1H), 8.04 (d, *J* = 8.3 Hz, 1H), 7.51 (dd, *J* = 8.5 Hz, 4.2 Hz, 1H), 2.34 (s, 3H) ppm; <sup>13</sup>C NMR (CDCl<sub>3</sub>, 100 MHz): δ = 168.8, 148.6, 140.7, 138.8, 138.2, 135.4, 129.5, 123.1, 117.7, 89.2, 25.1 ppm. HRMS *m/z* (ESI) calcd for [C<sub>11</sub>H<sub>9</sub>IN<sub>2</sub>O+Na]<sup>+</sup> 334.9652, found 334.9654.

### 1) Control experiments proving TEMPO cannot oxidize I<sup>-</sup> to I<sup>+</sup>

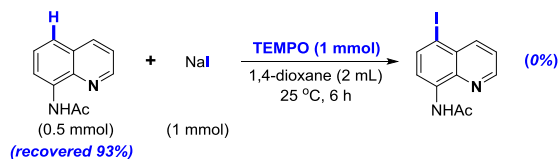

**Typical Procedure:** To a reaction tube charged with NaI (150 mg, 1 mmol) was added a solution of *N*-(quinolin-8-yl)acetamide (93 mg, 0.5 mmol) and TEMPO (156 mg, 1 mmol) in 1,4-dioxane (2 mL) via a syringe. The reaction mixture was stirred at 25 °C in air for 6 hours, and TLC suggested that no iodinated product was generated. After diluted with ethyl acetate, the reaction mixture was concentrated *in vacuo* to give dark residue, which was then purified by flash chromatography using petroleum ether and ethyl acetate (6:1, v/v) as the eluent on silical gel to recover the substrate *N*-(quinolin-8-yl)acetamide 86.7 mg (93%). White solid, m.p. 100.5-101.4 °C. <sup>1</sup>H NMR (CDCl<sub>3</sub>, 400 MHz): δ = 9.78 (s, 1H), 8.79-8.75 (m, 2H),

8.14 (dd,  $J = 8.3$  Hz, 1.7 Hz, 1H), 7.54-7.47 (m, 2H), 7.43 (dd,  $J = 8.3$  Hz, 4.2 Hz, 1H), 2.34 (s, 3H) ppm;  $^{13}\text{C}$

**NMR (CDCl<sub>3</sub>, 100 MHz):**  $\delta = 168.7, 148.0, 138.2, 136.3, 134.5, 127.9, 127.3, 121.5, 121.4, 116.3, 25.1$  ppm.

## Gram-scale Aminoiodination of Alkene with NaI and NFSI

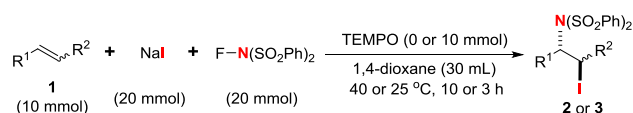

**Method A:** To a reaction tube charged with NaI (3.00 g, 20 mmol) and NFSI (6.31 g, 20 mmol) was added a solution of alkenes **1** (10 mmol) in 1,4-dioxane (30 mL) dropwise. The reaction mixture was stirred at 40 °C in air for 10 hours. After cooling by iced water, the reaction mixture was diluted with ethyl acetate, washed with water and brine, dried over Na<sub>2</sub>SO<sub>4</sub>, and concentrated *in vacuo* to give dark residue, which was then purified by flash chromatography using petroleum ether and ethyl acetate (15:1 to 6:1, v/v) as the eluent on silical gel to afford corresponding aminoiodinated products **2** or **3**.

**Method B:** To a reaction tube charged with NaI (3.00 g, 20 mmol) and NFSI (6.31 g, 20 mmol) cooled by iced water was added a solution of alkenes **1** (10 mmol) and TEMPO (1.56 g, 10 mmol) in 1,4-dioxane (30 mL) dropwise. The reaction mixture was stirred at 25 °C in air for 3 hours, and then diluted with ethyl acetate, washed with water and brine, dried over Na<sub>2</sub>SO<sub>4</sub>, and concentrated *in vacuo* to give dark residue, which was then purified by flash chromatography using petroleum ether and ethyl acetate (15:1 to 6:1, v/v) as the eluent on silical gel to afford corresponding aminoiodinated products **2** or **3**.

### Gram-scale Aminoiodination of Styrene (1a):

**Method A:** The reaction of 10 mmol of styrene (**1a**) with NaI (20 mmol) and NFSI (20 mmol) at 40 °C afforded 4.10 g of **2a** (78%) after flash chromatography on silica gel using petroleum ether and ethyl acetate (15:1 to 6:1, v/v) as the eluent.

**Method B:** The reaction of 10 mmol of styrene (**1a**) with NaI (20 mmol), NFSI (20 mmol) and TEMPO (10 mmol) at 25 °C afforded 3.93 g of **2a** (75%) after flash chromatography on silica gel using petroleum ether and ethyl acetate (15:1 to 6:1, v/v) as the eluent.

### Gram-scale Aminoiodination of vinylcyclohexane (1m):

**Method A:** The reaction of 10 mmol of vinylcyclohexane (**1m**) with NaI (20 mmol) and NFSI (20 mmol)

at 40 °C afforded 1.74 g of **2m** (32.6%) and 2.73 g of **3m** (51.2%) after flash chromatography on silica gel using petroleum ether and ethyl acetate (25:1 to 6:1, v/v) as the eluent.

**Method B:** The reaction of 10 mmol of vinylcyclohexane (**1m**) with NaI (20 mmol), NFSI (20 mmol) and TEMPO (10 mmol) at 25 °C afforded 0.64 g of **2m** (12.0%) and 3.94 g of **3m** (73.9%) after flash chromatography on silica gel using petroleum ether and ethyl acetate (25:1 to 6:1, v/v) as the eluent.

**Gram-scale Aminoiodination of cyclohexene (1o):**

**Method A:** The reaction of 10 mmol of cyclohexene (**1o**) with NaI (20 mmol) and NFSI (20 mmol) at 40 °C afforded 4.02 g of **2o** (80%) after flash chromatography on silica gel using petroleum ether and ethyl acetate (15:1 to 6:1, v/v) as the eluent.

**Method B:** The reaction of 10 mmol of cyclohexene (**1o**) with NaI (20 mmol), NFSI (20 mmol) and TEMPO (10 mmol) at 25 °C afforded 4.08 g of **2o** (81%) after flash chromatography on silica gel using petroleum ether and ethyl acetate (15:1 to 6:1, v/v) as the eluent.

**Gram-scale Aminoiodination of vinyl benzoate (1v):**

**Method A:** The reaction of 10 mmol of vinyl benzoate (**1v**) with NaI (20 mmol) and NFSI (20 mmol) at 40 °C afforded 4.66 g of **2v** (82%) after flash chromatography on silica gel using petroleum ether and ethyl acetate (10:1 to 6:1, v/v) as the eluent.

**Method B:** The reaction of 10 mmol of vinyl benzoate (**1v**) with NaI (20 mmol), NFSI (20 mmol) and TEMPO (10 mmol) at 25 °C afforded 4.55 g of **2v** (80%) after flash chromatography on silica gel using petroleum ether and ethyl acetate (10:1 to 6:1, v/v) as the eluent.

**Gram-scale Aminoiodination of trimethyl(vinyl)silane (1w):**

**Method A:** The reaction of 10 mmol of trimethyl(vinyl)silane (**1w**) with NaI (20 mmol) and NFSI (20 mmol) at 40 °C afforded 3.23 g of **3w** (62%) after flash chromatography on silica gel using petroleum ether and ethyl acetate (15:1 to 6:1, v/v) as the eluent.

**Method B:** The reaction of 10 mmol of trimethyl(vinyl)silane (**1w**) with NaI (20 mmol), NFSI (20 mmol) and TEMPO (10 mmol) at 25 °C afforded 3.88 g of **3w** (74%) after flash chromatography on silica gel using petroleum ether and ethyl acetate (15:1 to 6:1, v/v) as the eluent.

## A Preliminary Attempt on Aminobromination of Styrene

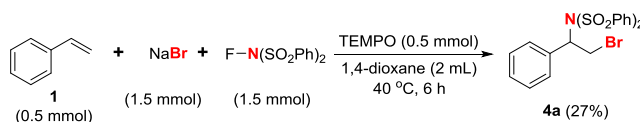

**General Procedure:** To a reaction tube charged with NaBr (155 mg, 1.5 mmol) and NFSI (473 mg, 1.5 mmol) was added a solution of styrene **1a** (52 mg, 0.5 mmol) and TEMPO (78 mg, 0.5 mmol) in 1,4-dioxane (2 mL) via a syringe. The reaction mixture was stirred at 40 °C in air for 6 hours. After cooling by iced water, the reaction mixture was diluted with ethyl acetate, washed with water and brine, dried over Na<sub>2</sub>SO<sub>4</sub>, and concentrated *in vacuo* to give dark residue, which was then purified by flash chromatography using petroleum ether and ethyl acetate (15:1, v/v) as the eluent on silical gel to afford 64.8 mg of the aminobrominated products **4a** (27%).

### ***N*-(2-Bromo-1-phenylethyl)-*N*-(phenylsulfonyl)benzenesulfonamide (**4a**)**

**4a** White solid, m.p. 148.5-149.5 °C. <sup>1</sup>H NMR (CDCl<sub>3</sub>, 400 MHz): δ = 7.58-7.43 (m, 10H), 7.35-7.32 (m, 5H), 5.79 (dd, *J* = 10.9 Hz, 3.6 Hz, 1H), 4.44 (t, *J* = 10.8 Hz, 1H), 3.32 (dd, *J* = 10.7 Hz, 3.7 Hz, 1H) ppm; <sup>13</sup>C NMR (CDCl<sub>3</sub>, 100 MHz): δ = 139.9, 133.9, 132.7, 129.6, 128.9, 128.6, 128.4, 128.2, 64.6, 29.8 ppm. HRMS *m/z* (ESI) calcd for [C<sub>20</sub>H<sub>18</sub>BrNO<sub>4</sub>S<sub>2</sub>+Na]<sup>+</sup> 501.9753, found 501.9758.



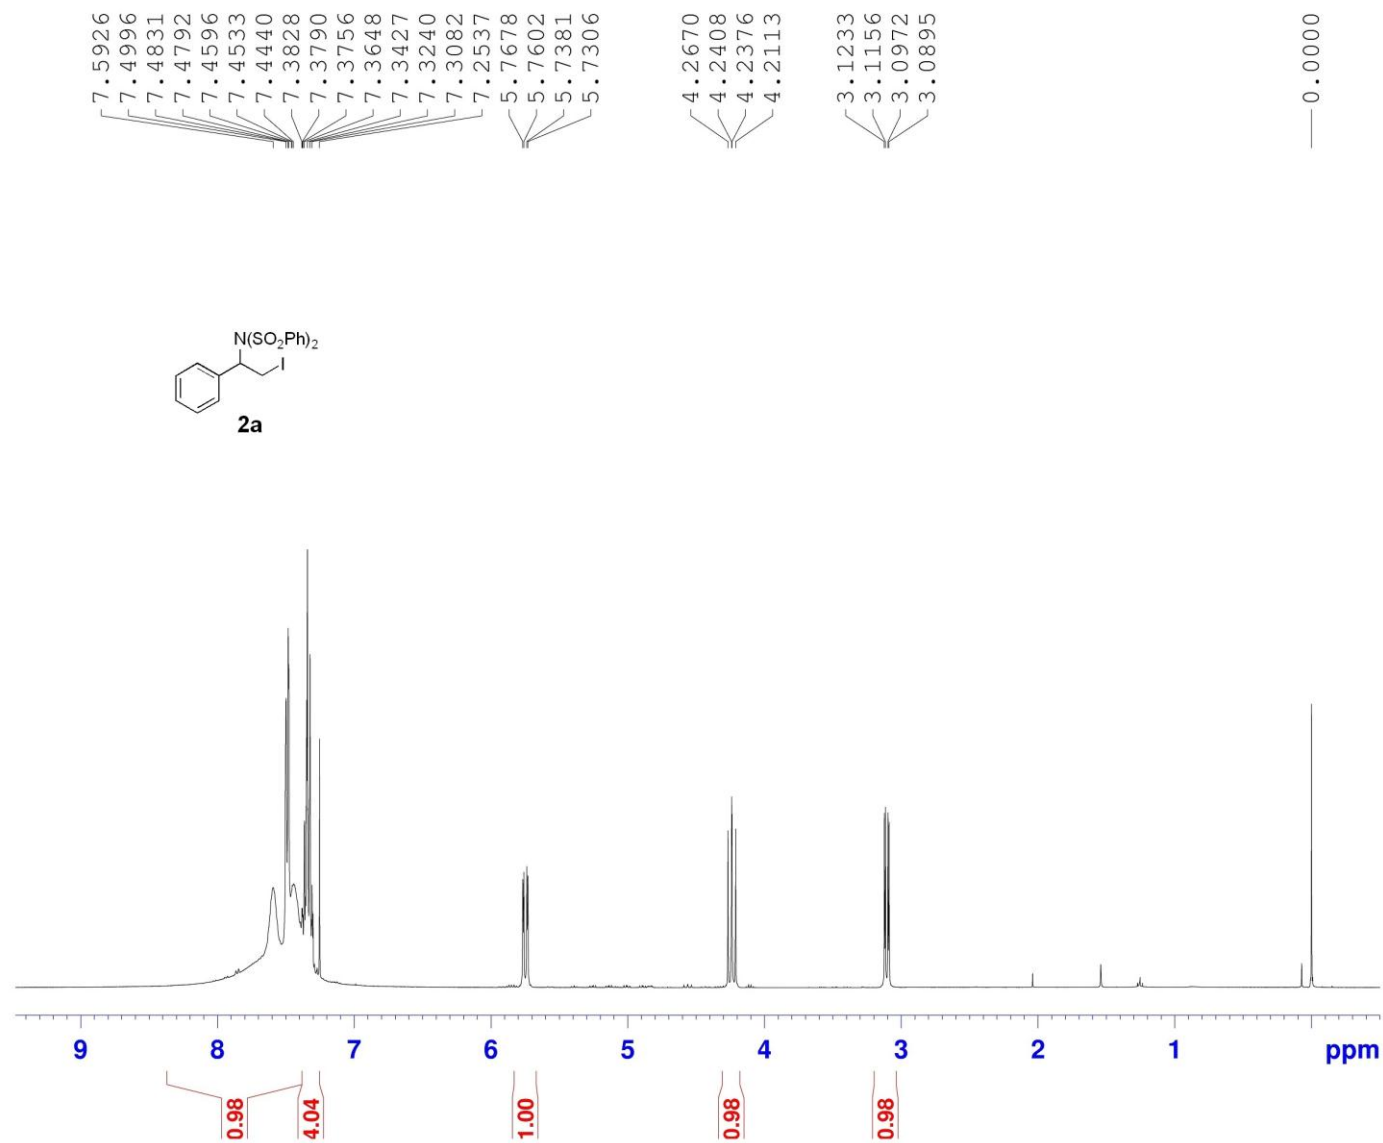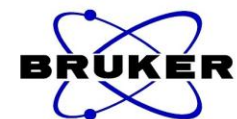

```

NAME      CLJ-WL-L206
EXPNO     1
PROCNO    1
Date_     20180314
Time      21.03
INSTRUM   spect
PROBHD    5 mm PABBO BB/
PULPROG   zg30
TD        65536
SOLVENT   CDCl3
NS         12
DS         0
SWH        8012.820 Hz
FIDRES     0.122266 Hz
AQ         4.0894966 sec
RG         70.36
DW         62.400 usec
DE         6.50 usec
TE         300.0 K
D1         1.00000000 sec
TD0        1
  
```

```

===== CHANNEL f1 =====
SF01      400.1324710 MHz
NUC1       1H
P1         8.04 usec
SI         65536
SF         400.1300122 MHz
WDW        EM
SSB        0
LB         0.30 Hz
GB         0
PC         1.00
  
```

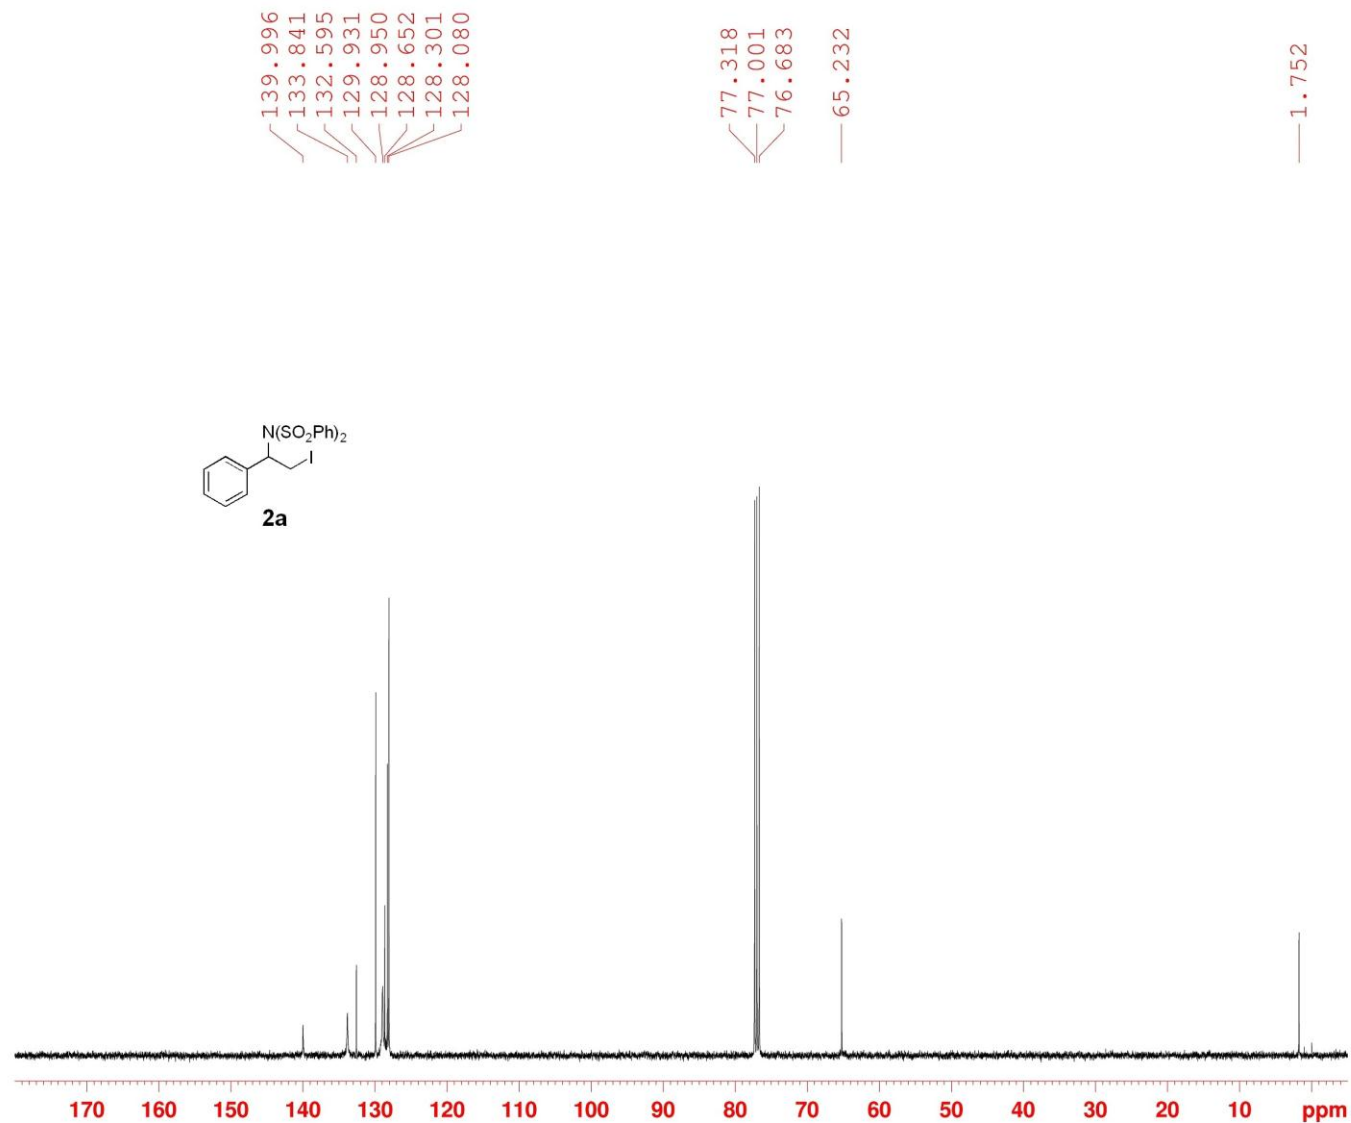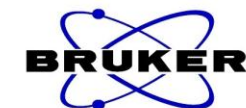

```

NAME      CLJ-WL-L206
EXPNO     2
PROCNO    1
Date_     20180314
Time      21.28
INSTRUM   spect
PROBHD    5 mm PABBO BB/
PULPROG   zgpg30
TD        65536
SOLVENT   CDCl3
NS        412
DS        0
SWH       24038.461 Hz
FIDRES    0.366798 Hz
AQ        1.3631988 sec
RG        194.26
DW        20.800 usec
DE        6.50 usec
TE        300.0 K
D1        2.00000000 sec
D11       0.03000000 sec
TD0       1
  
```

```

===== CHANNEL f1 =====
SFO1     100.6228293 MHz
NUC1     13C
P1       8.54 usec
SI       32768
SF       100.6127721 MHz
WDW      EM
SSB      0
LB       1.00 Hz
GB       0
PC       1.40
  
```

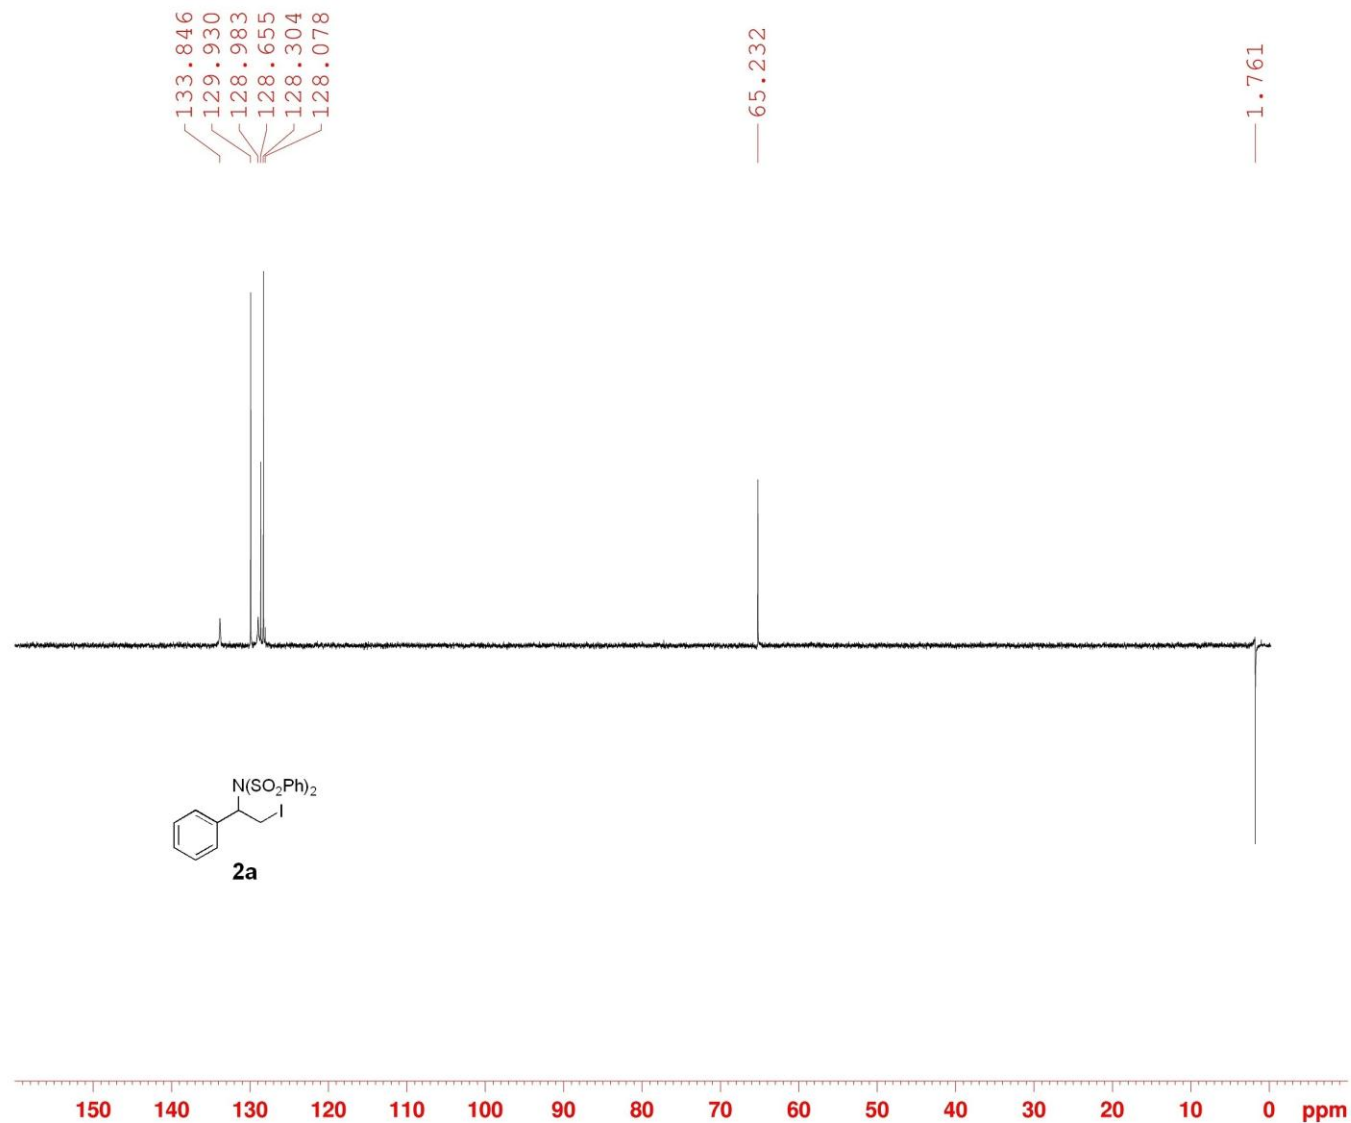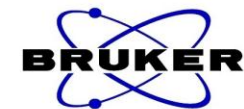

```

NAME      CLJ-WL-L255
EXPNO     1
PROCNO    1
Date_     20180509
Time      22.02
INSTRUM   spect
PROBHD    5 mm PABBO BB/
PULPROG   deptsp135
TD        65536
SOLVENT   CDCl3
NS        256
DS        4
SWH       16129.032 Hz
FIDRES    0.246110 Hz
AQ        2.0316660 sec
RG        194.26
DW        31.000 usec
DE        6.50 usec
TE        300.0 K
CNST2     145.0000000
D1        2.00000000 sec
D2        0.00344828 sec
D12       0.00002000 sec
TD0       1
  
```

```

===== CHANNEL f1 =====
SFO1    100.6208171 MHz
NUC1     13C
P1       8.54 usec
P13     2000.00 usec
SI       32768
SF     100.6127725 MHz
WDW      EM
SSB      0
LB       1.00 Hz
GB       0
PC       1.40
  
```

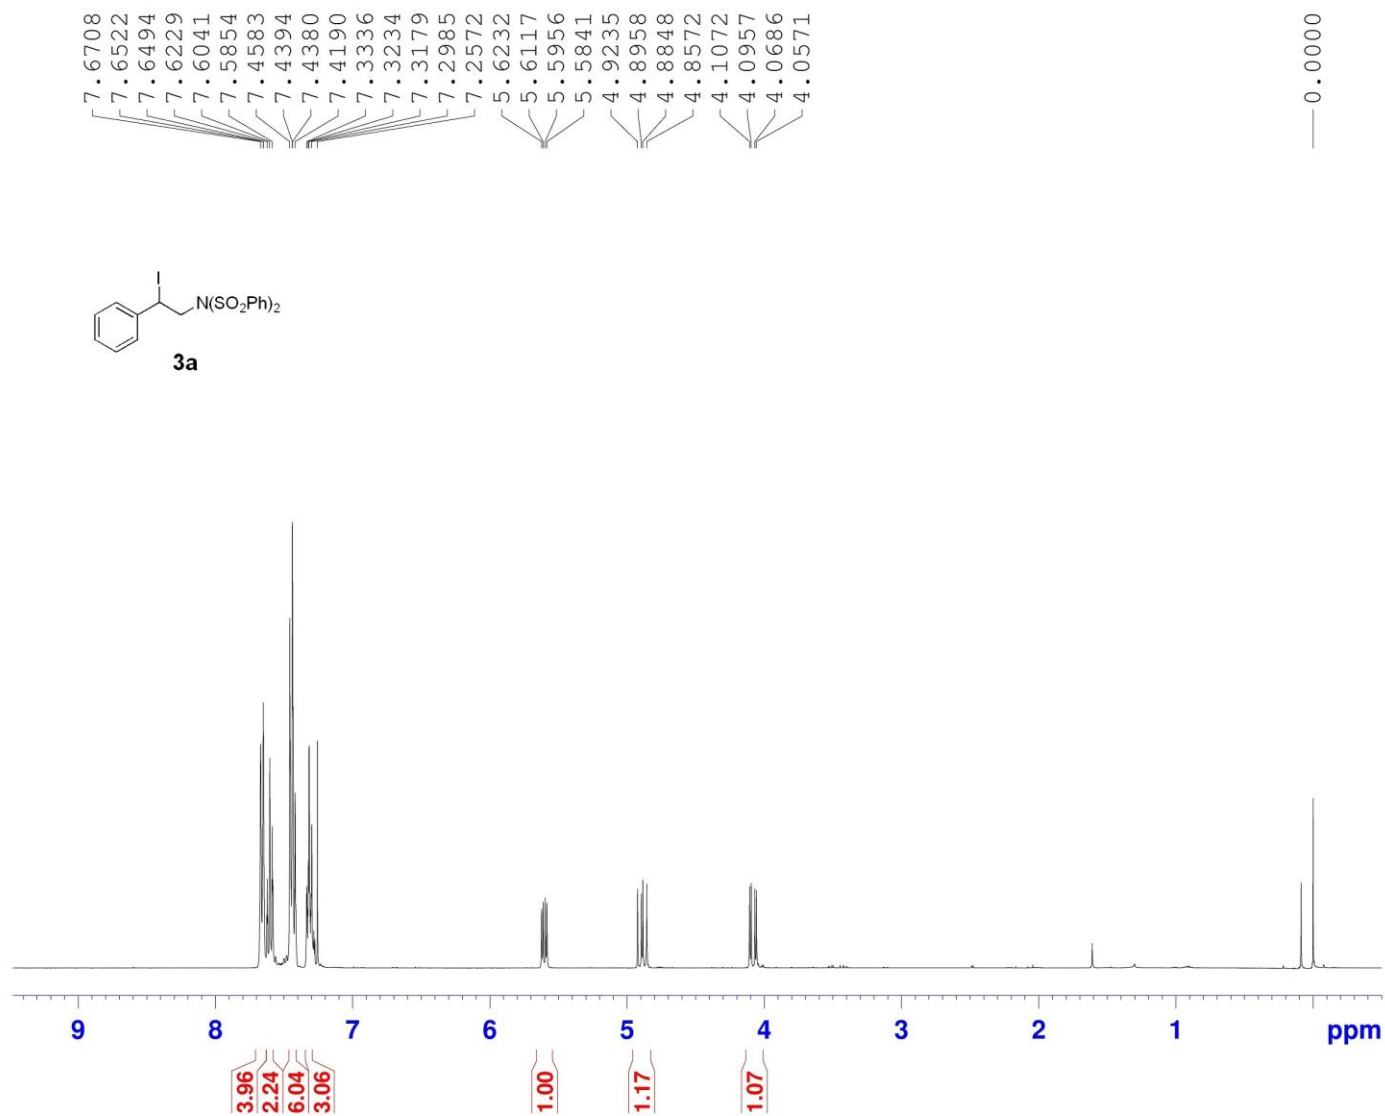

**BRUKER**

```

NAME      2018-06-07 leibowen-292
EXPNO     4
PROCNO    1
Date_     20180607
Time      9.34 h
INSTRUM   spect
PROBHD    z116098_0673 (
PULPROG   zg30
TD        65536
SOLVENT   CDCl3
NS         16
DS         2
SWH        8012.820 Hz
FIDRES     0.244532 Hz
AQ         4.0894966 sec
RG         80.75
DW         62.400 usec
DE         6.50 usec
TE         298.2 K
D1         1.00000000 sec
TD0        1
SFO1       400.1324708 MHz
NUC1       1H
P1         10.00 usec
SI         65536
SF         400.1300108 MHz
WDW        EM
SSB        0
LB         0.30 Hz
GB         0
PC         1.00
  
```

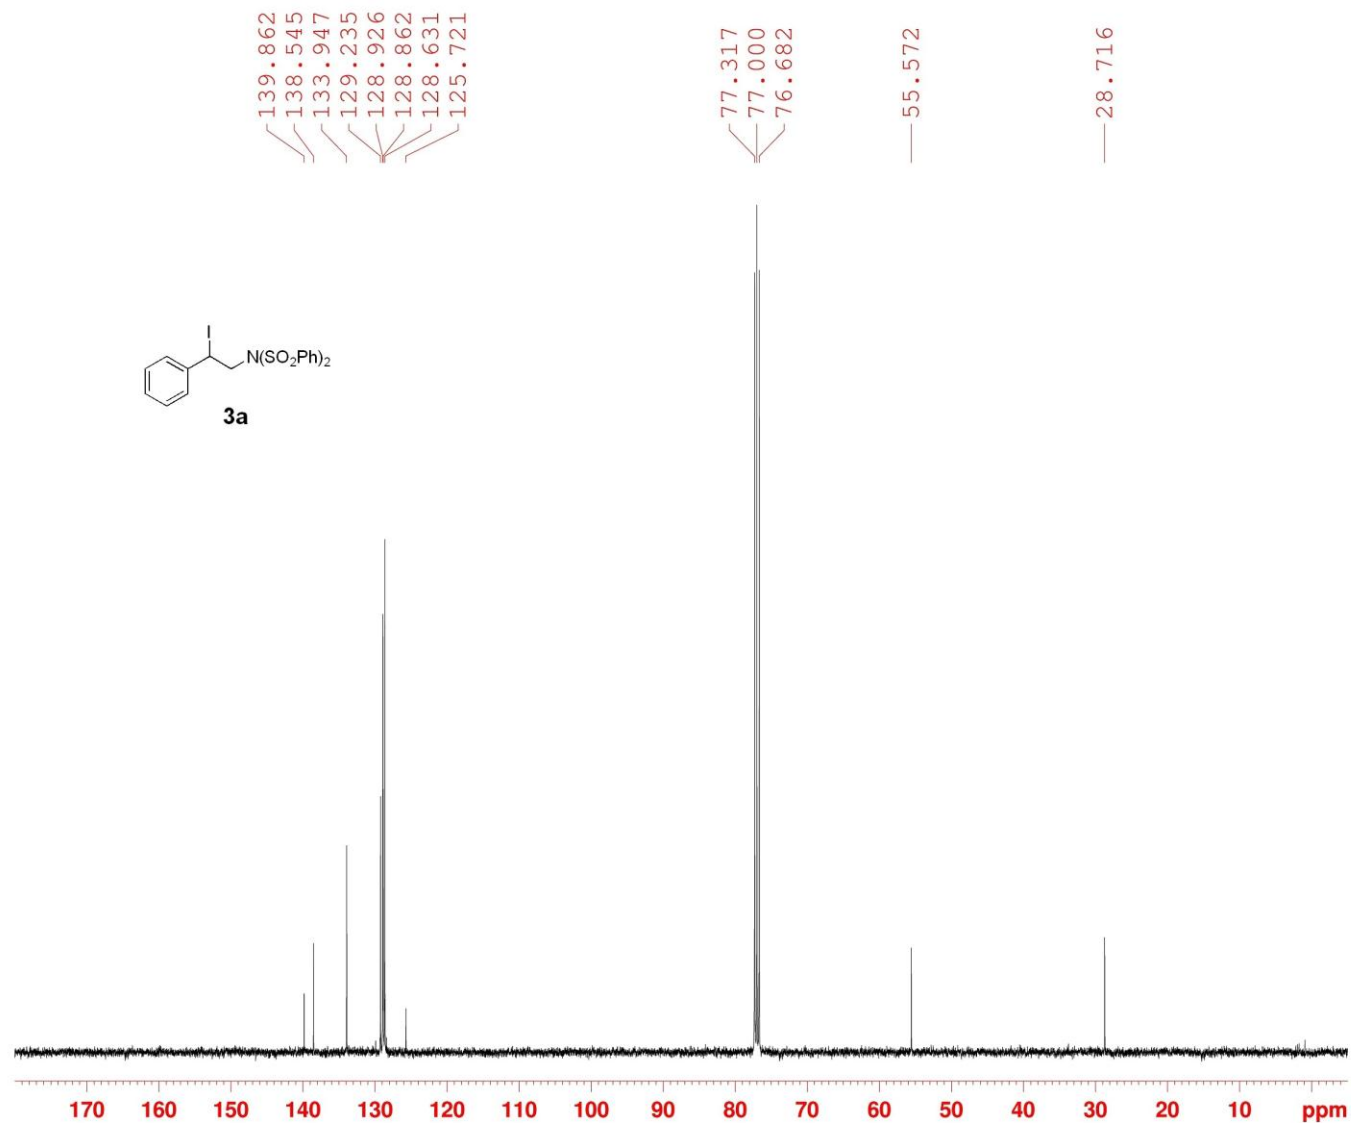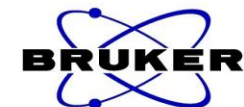

NAME 2018-06-07 leibowen-292  
 EXPNO 3  
 PROCNO 1  
 Date\_ 20180607  
 Time 10.05 h  
 INSTRUM spect  
 PROBHD Z116098\_0673 (  
 PULPROG zgpg30  
 TD 65536  
 SOLVENT CDCl3  
 NS 512  
 DS 4  
 SWH 24038.461 Hz  
 FIDRES 0.733596 Hz  
 AQ 1.3631988 sec  
 RG 203.48  
 DW 20.800 usec  
 DE 6.50 usec  
 TE 298.2 K  
 D1 2.00000000 sec  
 D11 0.03000000 sec  
 TD0 1  
 SFO1 100.6228298 MHz  
 NUC1 13C  
 P1 10.00 usec  
 SI 32768  
 SF 100.6127722 MHz  
 WDW EM  
 SSB 0  
 LB 1.00 Hz  
 GB 0  
 PC 1.40

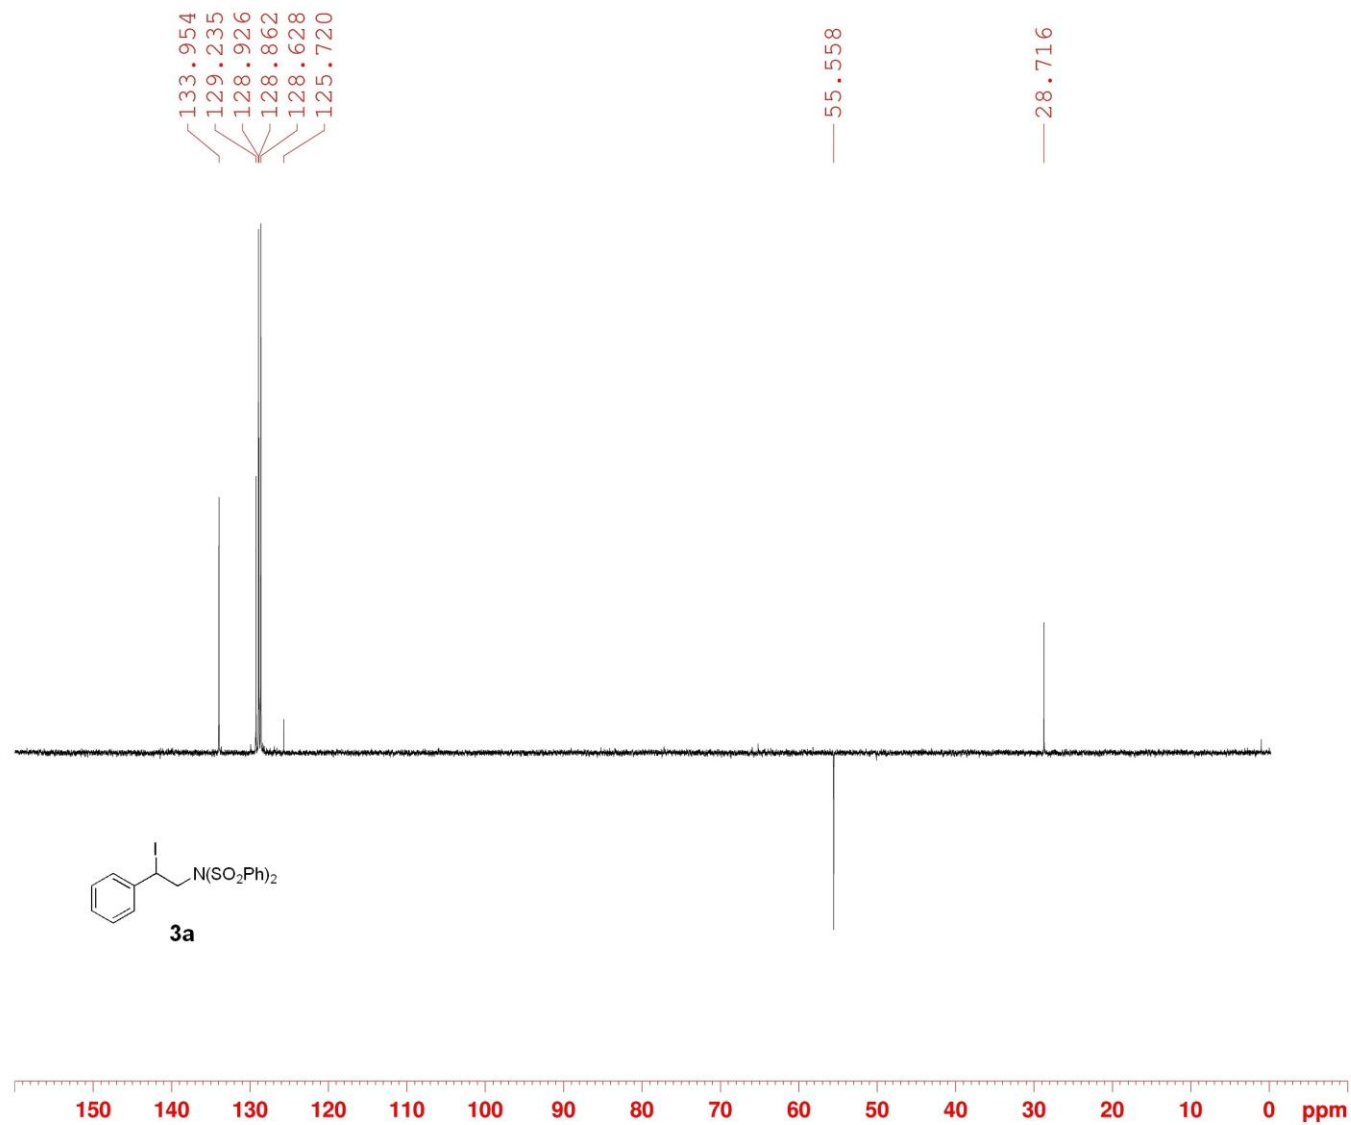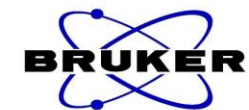

NAME 2018-06-11 leibowen-298  
 EXPNO 1  
 PROCNO 1  
 Date\_ 20180611  
 Time 15.17 h  
 INSTRUM spect  
 PROBHD Z116098\_0673 (  
 PULPROG deptsp135  
 TD 65536  
 SOLVENT CDC13  
 NS 512  
 DS 8  
 SWH 16129.032 Hz  
 FIDRES 0.492219 Hz  
 AQ 2.0316660 sec  
 RG 203.48  
 DW 31.000 usec  
 DE 6.50 usec  
 TE 296.8 K  
 CNST2 145.0000000  
 D1 2.00000000 sec  
 D2 0.00344828 sec  
 D12 0.00002000 sec  
 TD0 1  
 SFO1 100.6208175 MHz  
 NUC1 13C  
 P1 10.00 usec  
 P13 2000.00 usec  
 SI 32768  
 SF 100.6127729 MHz  
 WDW EM  
 SSB 0  
 LB 1.00 Hz  
 GB 0  
 PC 1.40

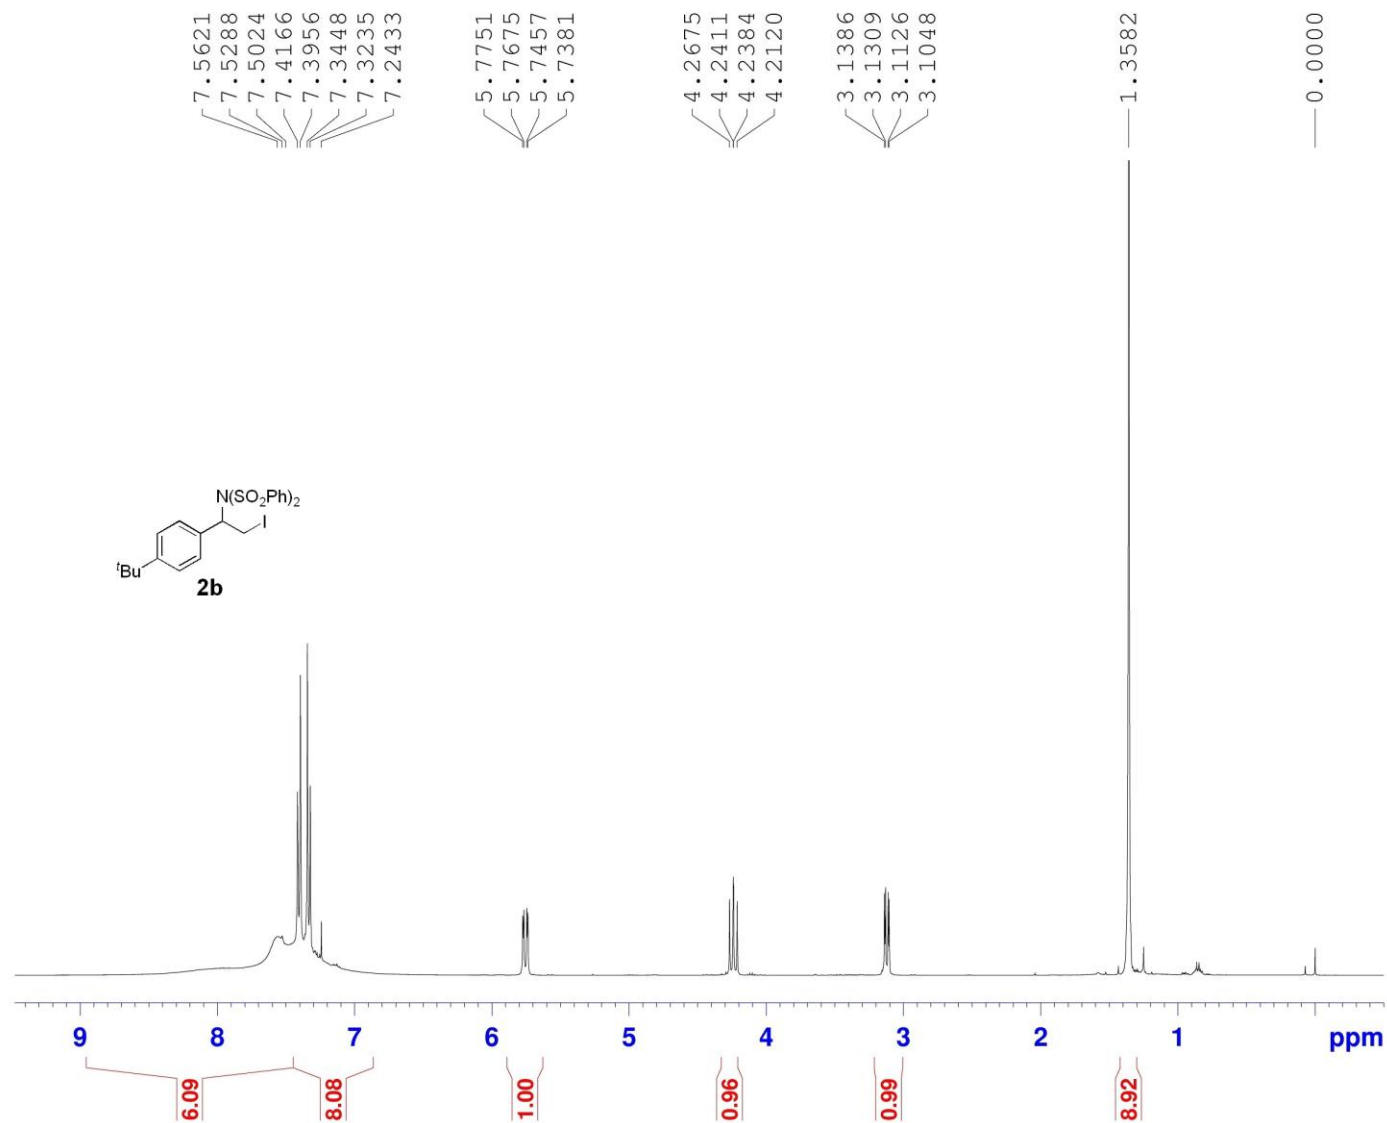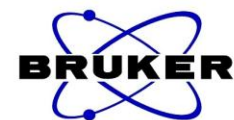

```

NAME      CLJ-WL-L264
EXPNO     1
PROCNO    1
Date_     20180513
Time      0.43
INSTRUM   spect
PROBHD    5 mm PABBO BB/
PULPROG   zg30
TD        65536
SOLVENT   CDCl3
NS         12
DS         0
SWH        8012.820 Hz
FIDRES     0.122266 Hz
AQ         4.0894966 sec
RG         18.6
DW         62.400 usec
DE         6.50 usec
TE         300.0 K
D1         1.00000000 sec
TD0        1
  
```

```

===== CHANNEL f1 =====
SFO1      400.1324710 MHz
NUC1      1H
P1        8.04 usec
SI        65536
SF        400.1300164 MHz
WDW       EM
SSB       0
LB        0.30 Hz
GB        0
PC        1.00
  
```

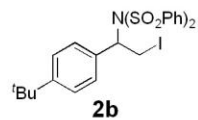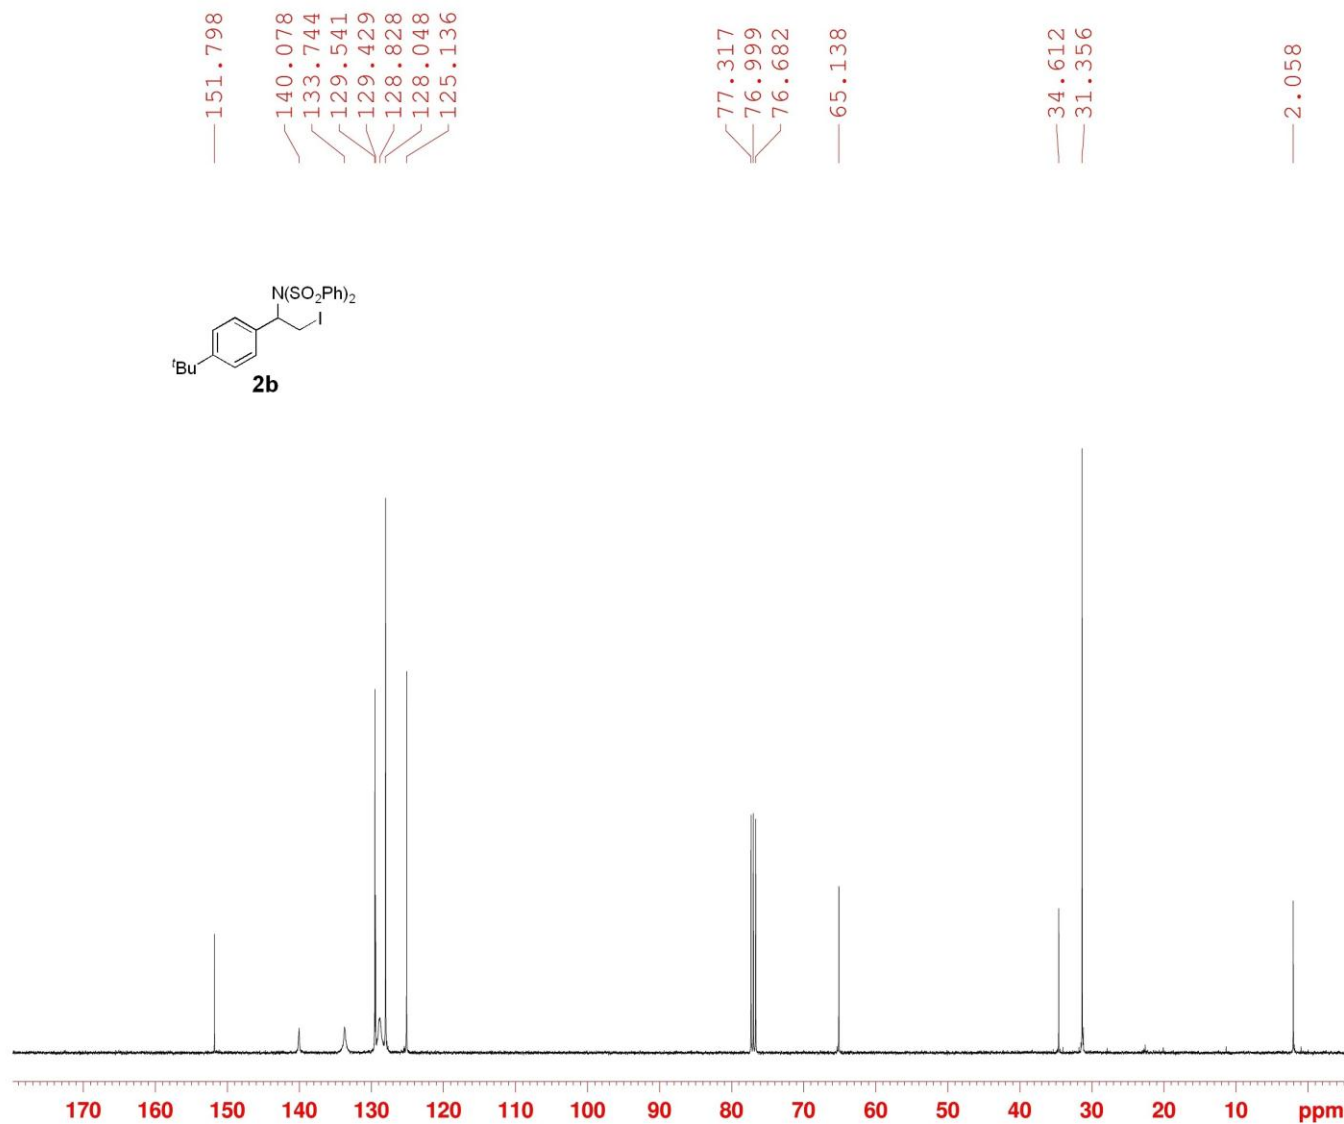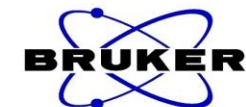

NAME CLJ-WL-L264  
 EXPNO 2  
 PROCNO 1  
 Date\_ 20180513  
 Time 1.13  
 INSTRUM spect  
 PROBHD 5 mm PABBO BB/  
 PULPROG zgpgg30  
 TD 65536  
 SOLVENT CDCl3  
 NS 512  
 DS 0  
 SWH 24038.461 Hz  
 FIDRES 0.366798 Hz  
 AQ 1.3631988 sec  
 RG 194.26  
 DW 20.800 usec  
 DE 6.50 usec  
 TE 299.9 K  
 D1 2.00000000 sec  
 D11 0.03000000 sec  
 TD0 1

===== CHANNEL f1 =====  
 SFO1 100.6228293 MHz  
 NUC1 13C  
 P1 8.54 usec  
 SI 32768  
 SF 100.6127778 MHz  
 WDW EM  
 SSB 0  
 LB 1.00 Hz  
 GB 0  
 PC 1.40



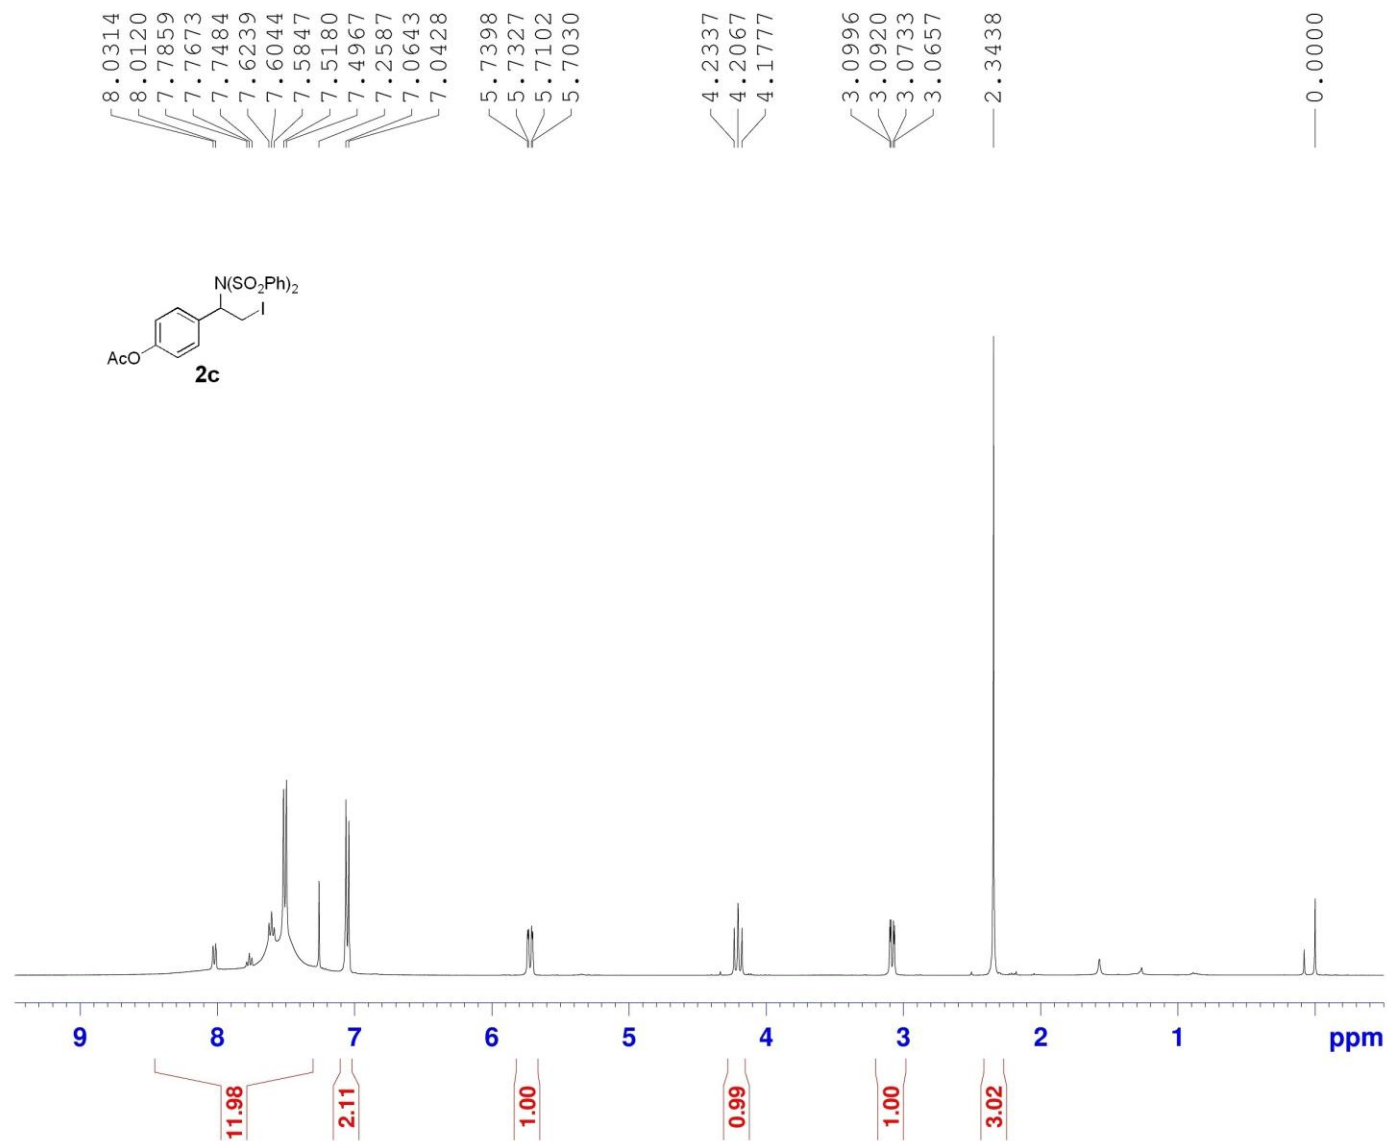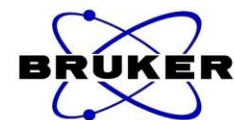

```

NAME      CLJ-WL-L228
EXPNO     1
PROCNO    1
Date_     20180414
Time      13.00
INSTRUM   spect
PROBHD    5 mm PABBO BB/
PULPROG   zg30
TD         65536
SOLVENT   CDCl3
NS         12
DS         0
SWH        8012.820 Hz
FIDRES     0.122266 Hz
AQ         4.0894966 sec
RG         77.71
DW         62.400 usec
DE         6.50 usec
TE         300.0 K
D1         1.00000000 sec
TD0        1
  
```

```

===== CHANNEL f1 =====
SF01      400.1324710 MHz
NUC1       1H
P1         8.04 usec
S1         65536
SF         400.1300102 MHz
WDW        EM
SSB        0
LB         0.30 Hz
GB         0
PC         1.00
  
```

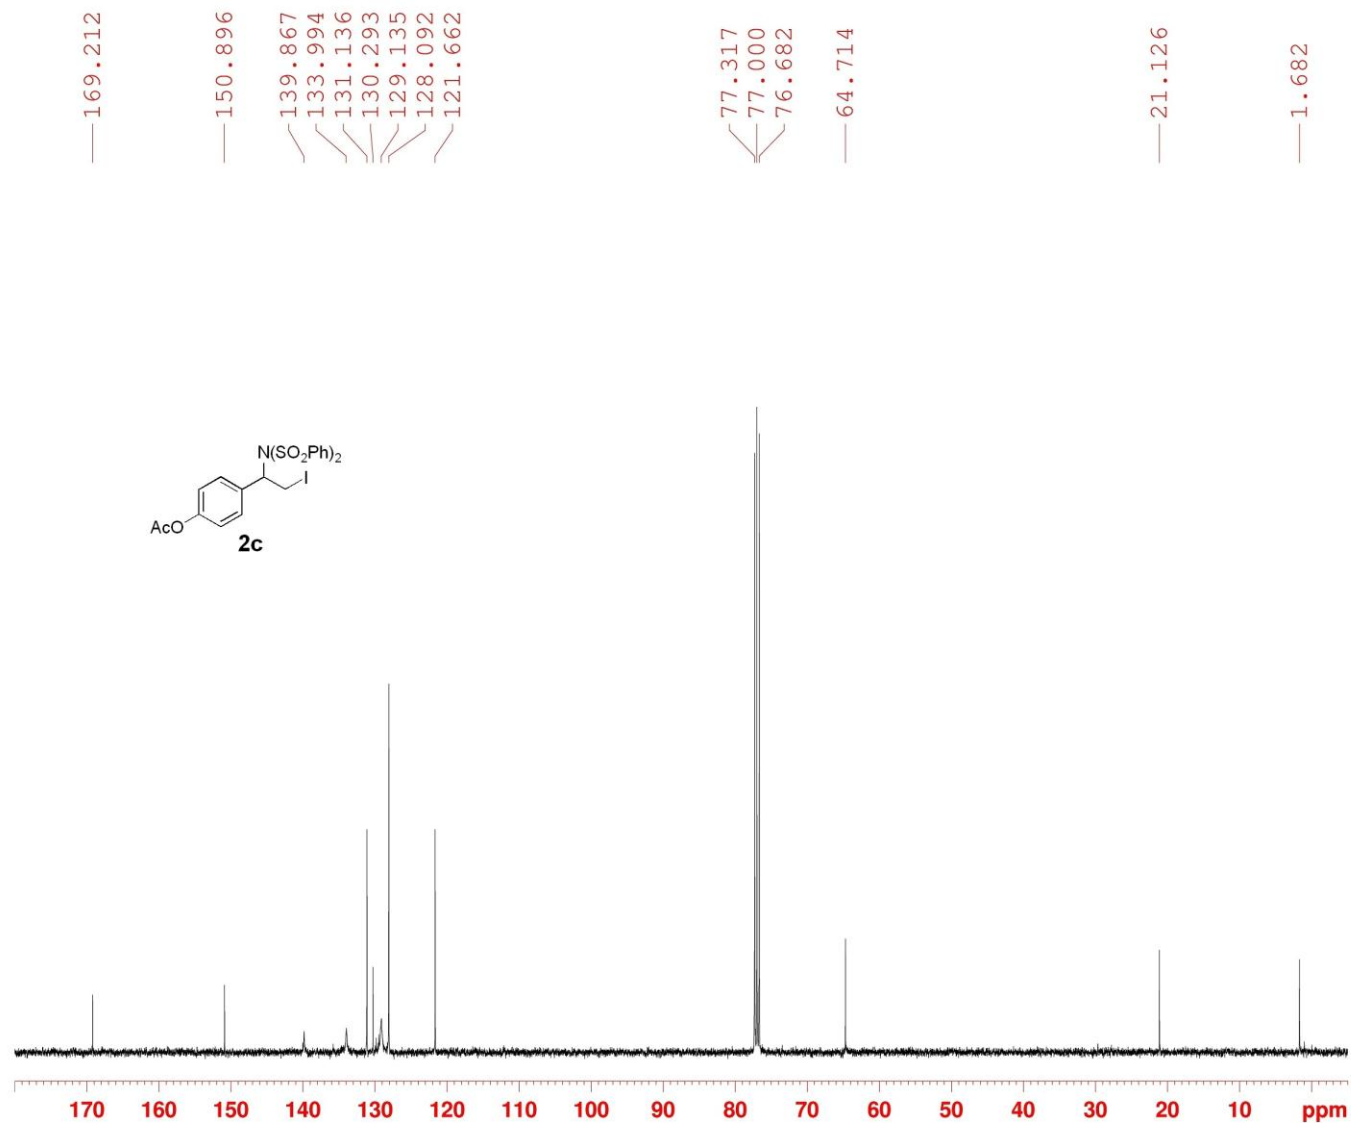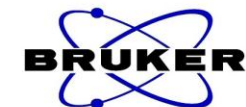

```

NAME      CLJ-WL-L228
EXPNO     2
PROCNO    1
Date_     20180414
Time      13.30
INSTRUM   spect
PROBHD    5 mm PABBO BB/
PULPROG   zgpg30
TD        65536
SOLVENT   CDCl3
NS        512
DS        0
SWH       24038.461 Hz
FIDRES    0.366798 Hz
AQ        1.3631988 sec
RG        194.26
DW        20.800 usec
DE        6.50 usec
TE        300.0 K
D1        2.00000000 sec
D11       0.03000000 sec
TD0       1

```

```

===== CHANNEL f1 =====
SFO1    100.6228293 MHz
NUC1     13C
P1       8.54 usec
SI      32768
SF    100.6127716 MHz
WDW      EM
SSB      0
LB       1.00 Hz
GB      0
PC       1.40

```

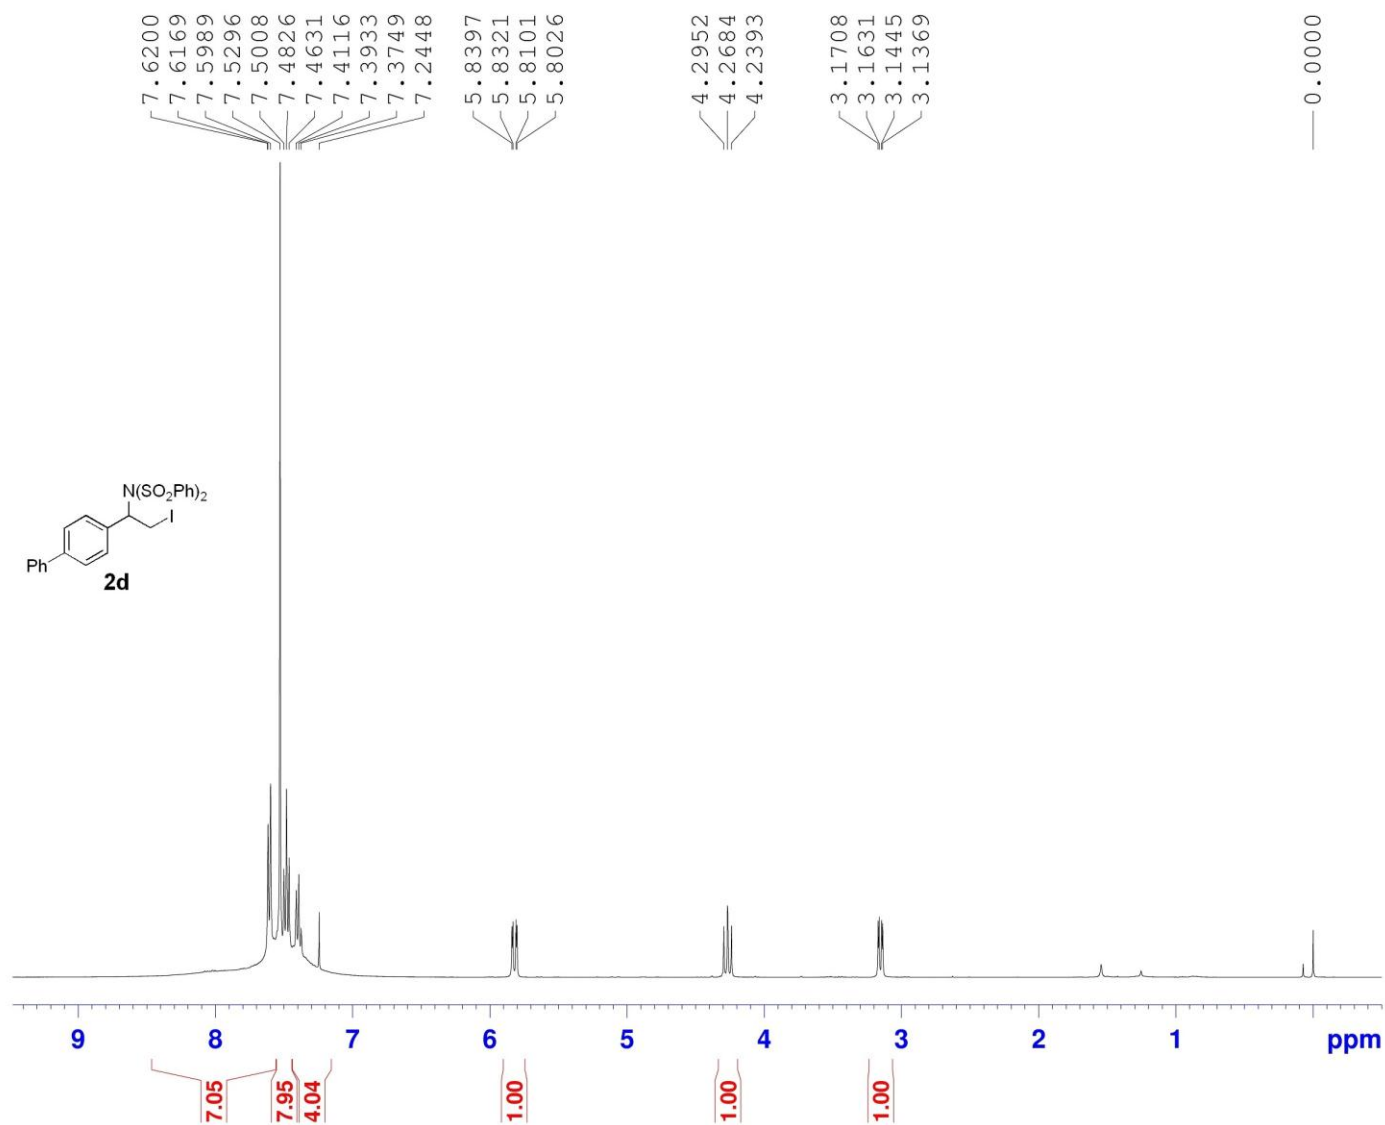

```

NAME      CLJ-WL-L256
EXPNO     1
PROCNO    1
Date_     20180509
Time      23.55
INSTRUM   spect
PROBHD    5 mm PABBO BB/
PULPROG   zg30
TD        65536
SOLVENT   CDCl3
NS         12
DS         0
SWH        8012.820 Hz
FIDRES     0.122266 Hz
AQ         4.0894966 sec
RG         57.79
DW         62.400 usec
DE         6.50 usec
TE         300.0 K
D1         1.00000000 sec
TD0        1
  
```

```

===== CHANNEL f1 =====
SF01      400.1324710 MHz
NUC1       1H
P1         8.04 usec
SI         65536
SF         400.1300159 MHz
WDW        EM
SSB        0
LB         0.30 Hz
GB         0
PC         1.00
  
```

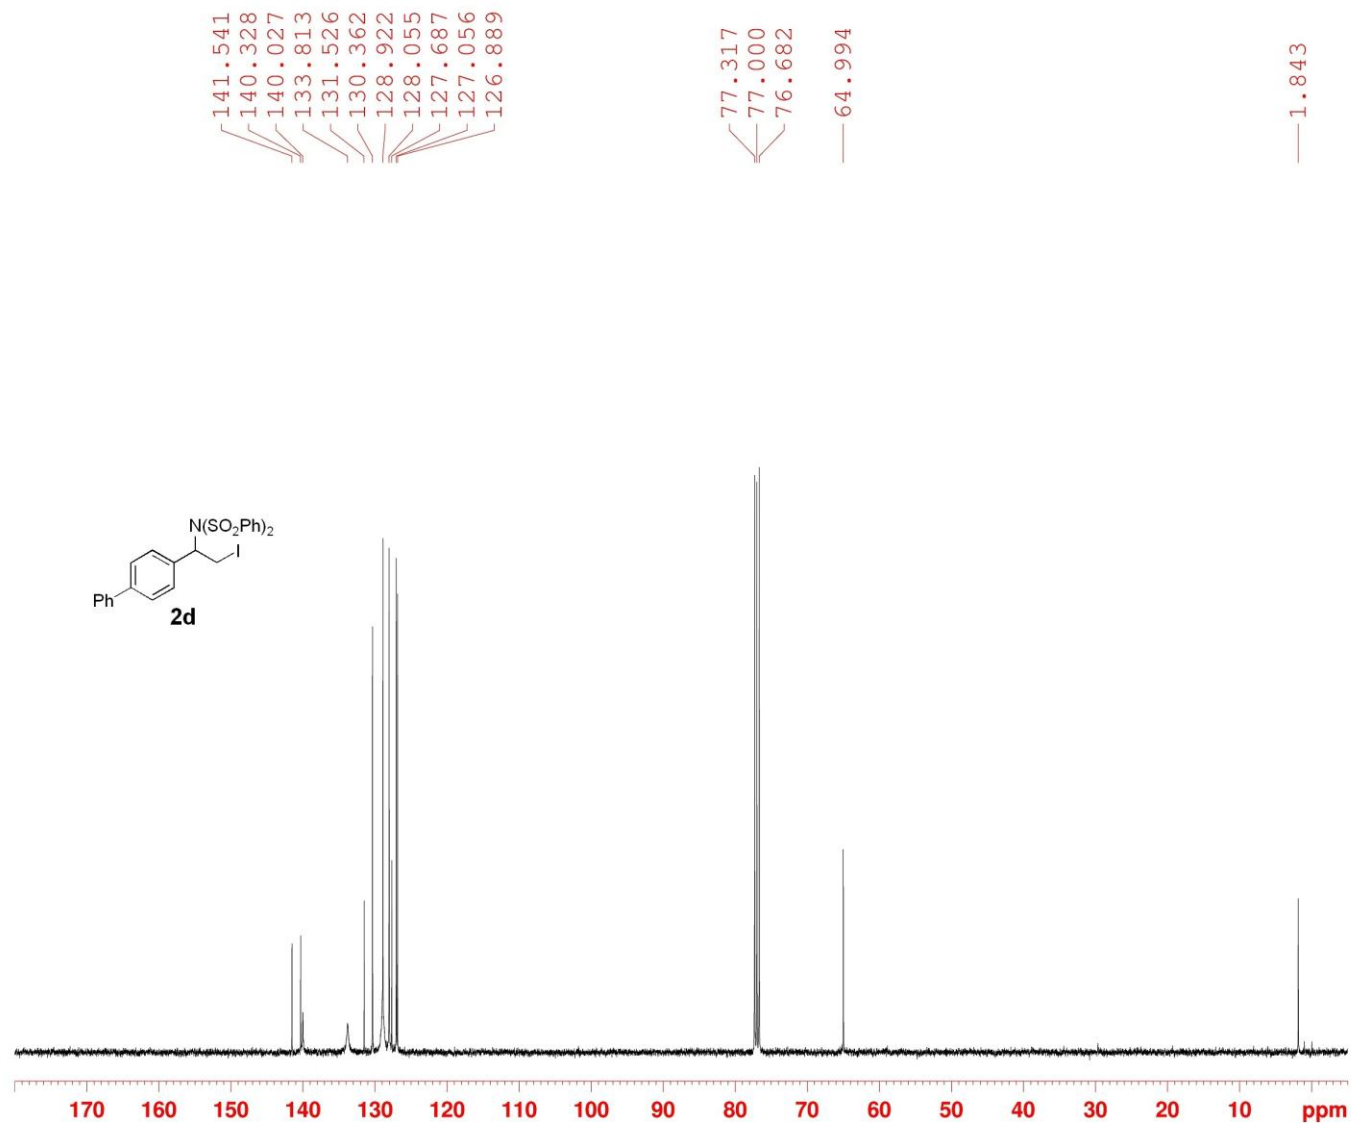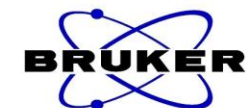

```

NAME      CLJ-WL-L256
EXPNO     2
PROCNO    1
Date_     20180510
Time      3.51
INSTRUM   spect
PROBHD    5 mm PABBO BB/
PULPROG   zgpg30
TD        65536
SOLVENT   CDCl3
NS        512
DS        0
SWH       24038.461 Hz
FIDRES    0.366798 Hz
AQ        1.3631988 sec
RG        194.26
DW        20.800 usec
DE        6.50 usec
TE        299.9 K
D1        2.00000000 sec
D11       0.03000000 sec
TD0       1
  
```

```

===== CHANNEL f1 =====
SFO1      100.6228293 MHz
NUC1      13C
P1        8.54 usec
SI        32768
SF        100.6127744 MHz
WDW       EM
SSB       0
LB        1.00 Hz
GB        0
PC        1.40
  
```

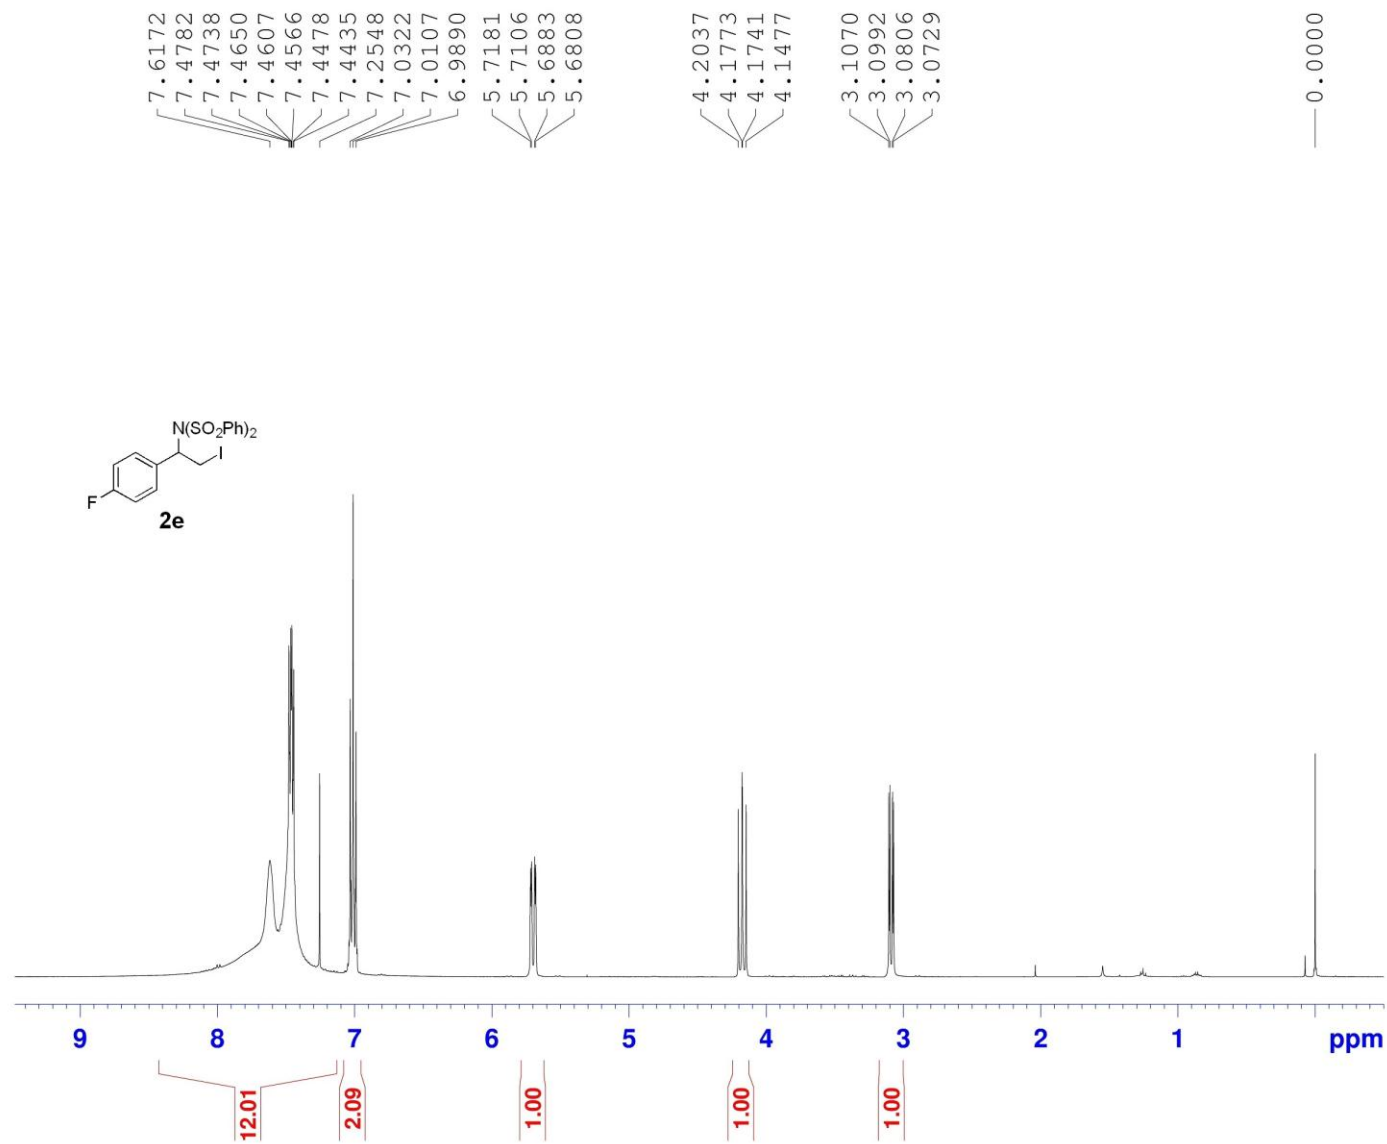

**BRUKER**

```

NAME      CLJ-WL-L220
EXPNO     1
PROCNO    1
Date_     20180410
Time      7.30
INSTRUM   spect
PROBHD    5 mm PABBO BB/
PULPROG   zg30
TD        65536
SOLVENT   CDCl3
NS         12
DS         0
SWH        8012.820 Hz
FIDRES     0.122266 Hz
AQ         4.0894966 sec
RG         63
DW         62.400 usec
DE         6.50 usec
TE         300.1 K
D1         1.00000000 sec
TD0        1

===== CHANNEL f1 =====
SFO1      400.1324710 MHz
NUC1       1H
P1         8.04 usec
SI         65536
SF         400.1300113 MHz
WDW        EM
SSB        0
LB         0.30 Hz
GB         0
PC         1.00
  
```

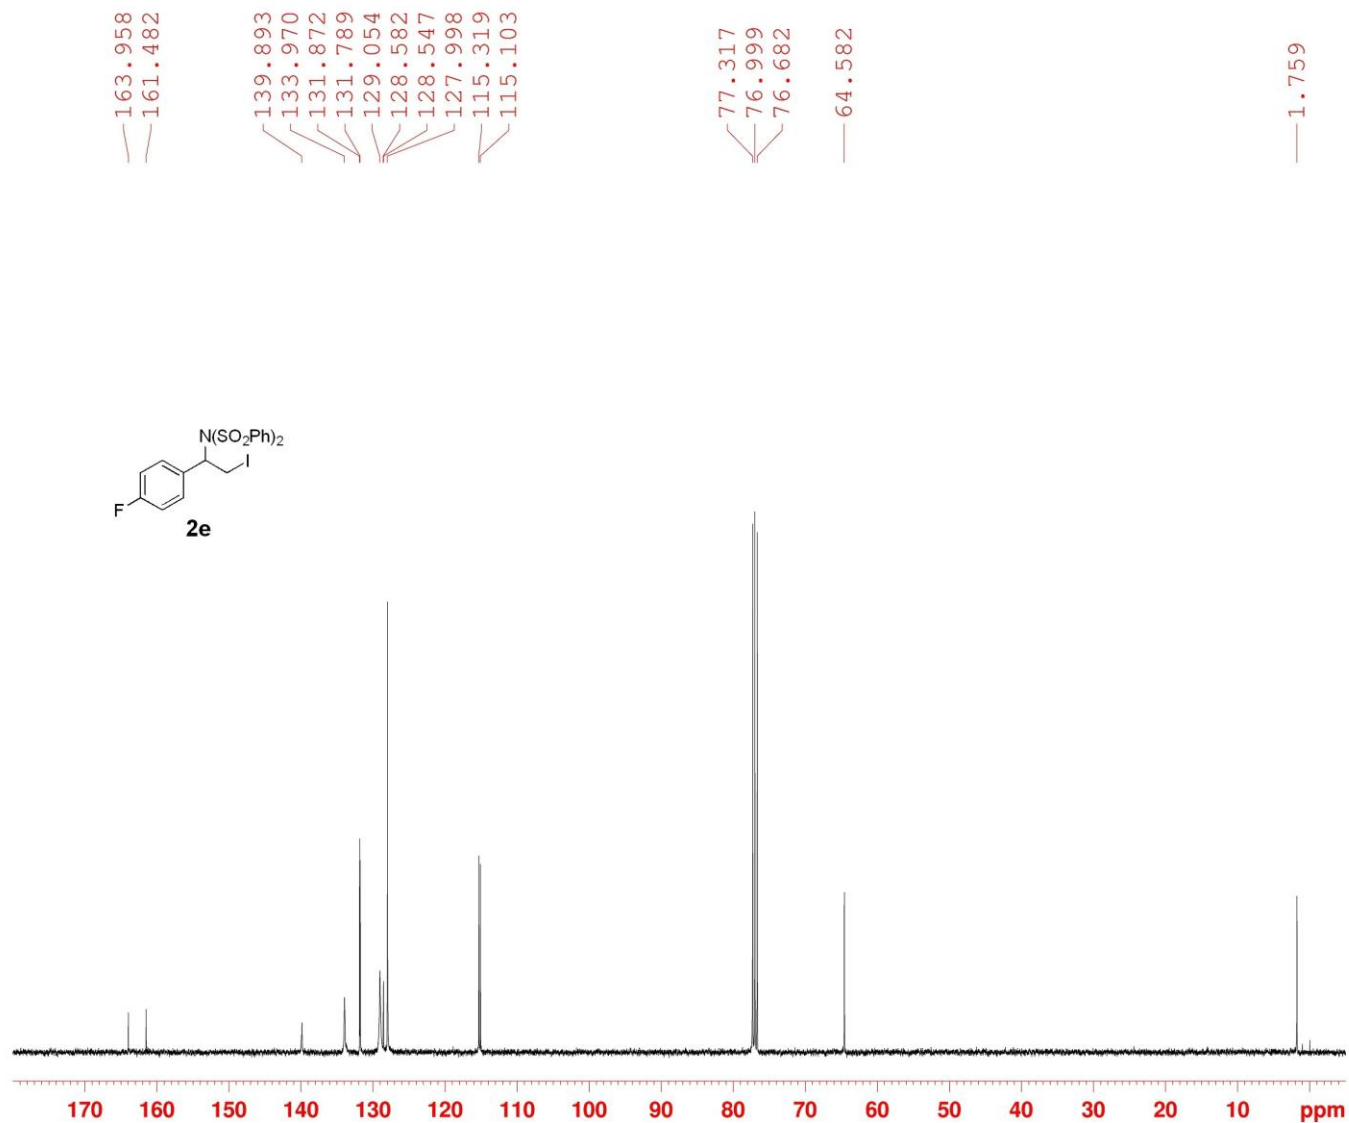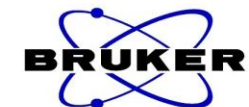

```

NAME      CLJ-WL-L220
EXPNO     2
PROCNO    1
Date_     20180410
Time      8.01
INSTRUM   spect
PROBHD    5 mm PABBO BB/
PULPROG   zgpg30
TD        65536
SOLVENT   CDCl3
NS        512
DS        0
SWH       24038.461 Hz
FIDRES    0.366798 Hz
AQ        1.3631988 sec
RG        194.26
DW        20.800 usec
DE        6.50 usec
TE        300.0 K
D1        2.00000000 sec
D11       0.03000000 sec
TD0       1

```

```

===== CHANNEL f1 =====
SFO1     100.6228293 MHz
NUC1     13C
P1       8.54 usec
SI       32768
SF       100.6127727 MHz
WDW      EM
SSB      0
LB       1.00 Hz
GB       0
PC       1.40

```

7.6175  
7.4810  
7.4770  
7.4622  
7.3272  
7.3078  
7.2887  
7.2812  
7.2684  
7.2537  
7.1910  
7.1665  
7.1648  
7.0802  
7.0746  
7.0696  
7.0568  
7.0507  
7.0452  
7.0368  
7.0300  
5.7122  
5.7047  
5.6828  
5.6753  
4.1910  
4.1641  
4.1621  
4.1351  
3.1099  
3.1024  
3.0834  
3.0759

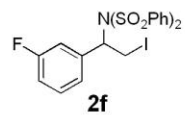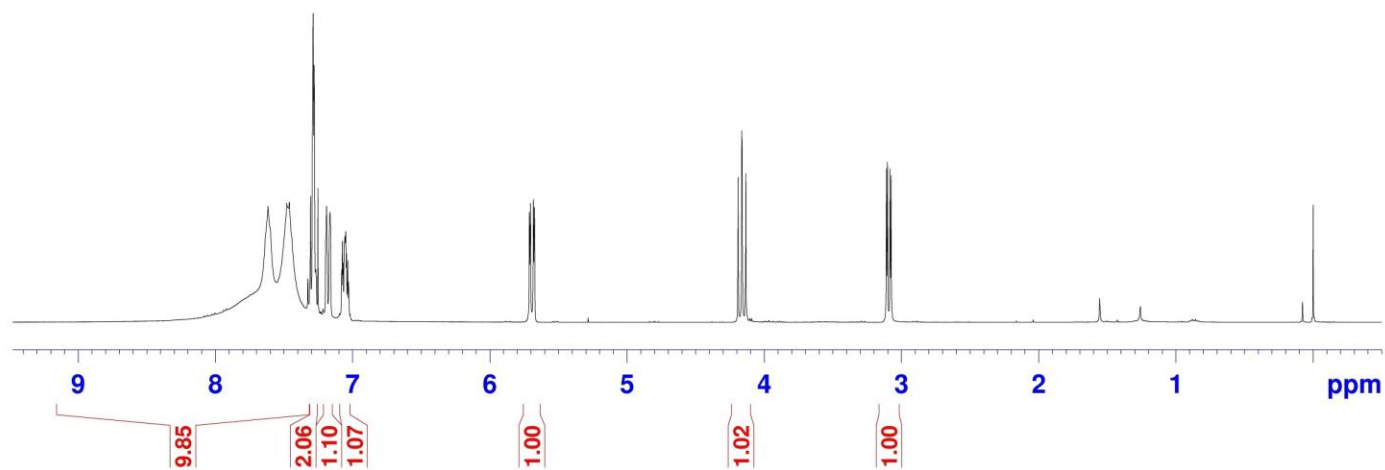

0.0000

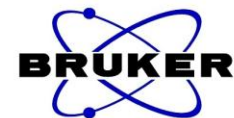

NAME CLJ-WL-L241  
 EXPNO 1  
 PROCNO 1  
 Date\_ 20180427  
 Time 6.23  
 INSTRUM spect  
 PROBHD 5 mm PABBO BB/  
 PULPROG zg30  
 TD 65536  
 SOLVENT CDCl3  
 NS 12  
 DS 0  
 SWH 8012.820 Hz  
 FIDRES 0.122266 Hz  
 AQ 4.0894966 sec  
 RG 57.79  
 DW 62.400 usec  
 DE 6.50 usec  
 TE 300.0 K  
 D1 1.00000000 sec  
 TD0 1

===== CHANNEL f1 =====  
 SF01 400.1324710 MHz  
 NUC1 1H  
 P1 8.04 usec  
 SI 65536  
 SF 400.1300123 MHz  
 WDW EM  
 SSB 0  
 LB 0.30 Hz  
 GB 0  
 PC 1.00

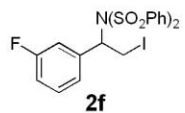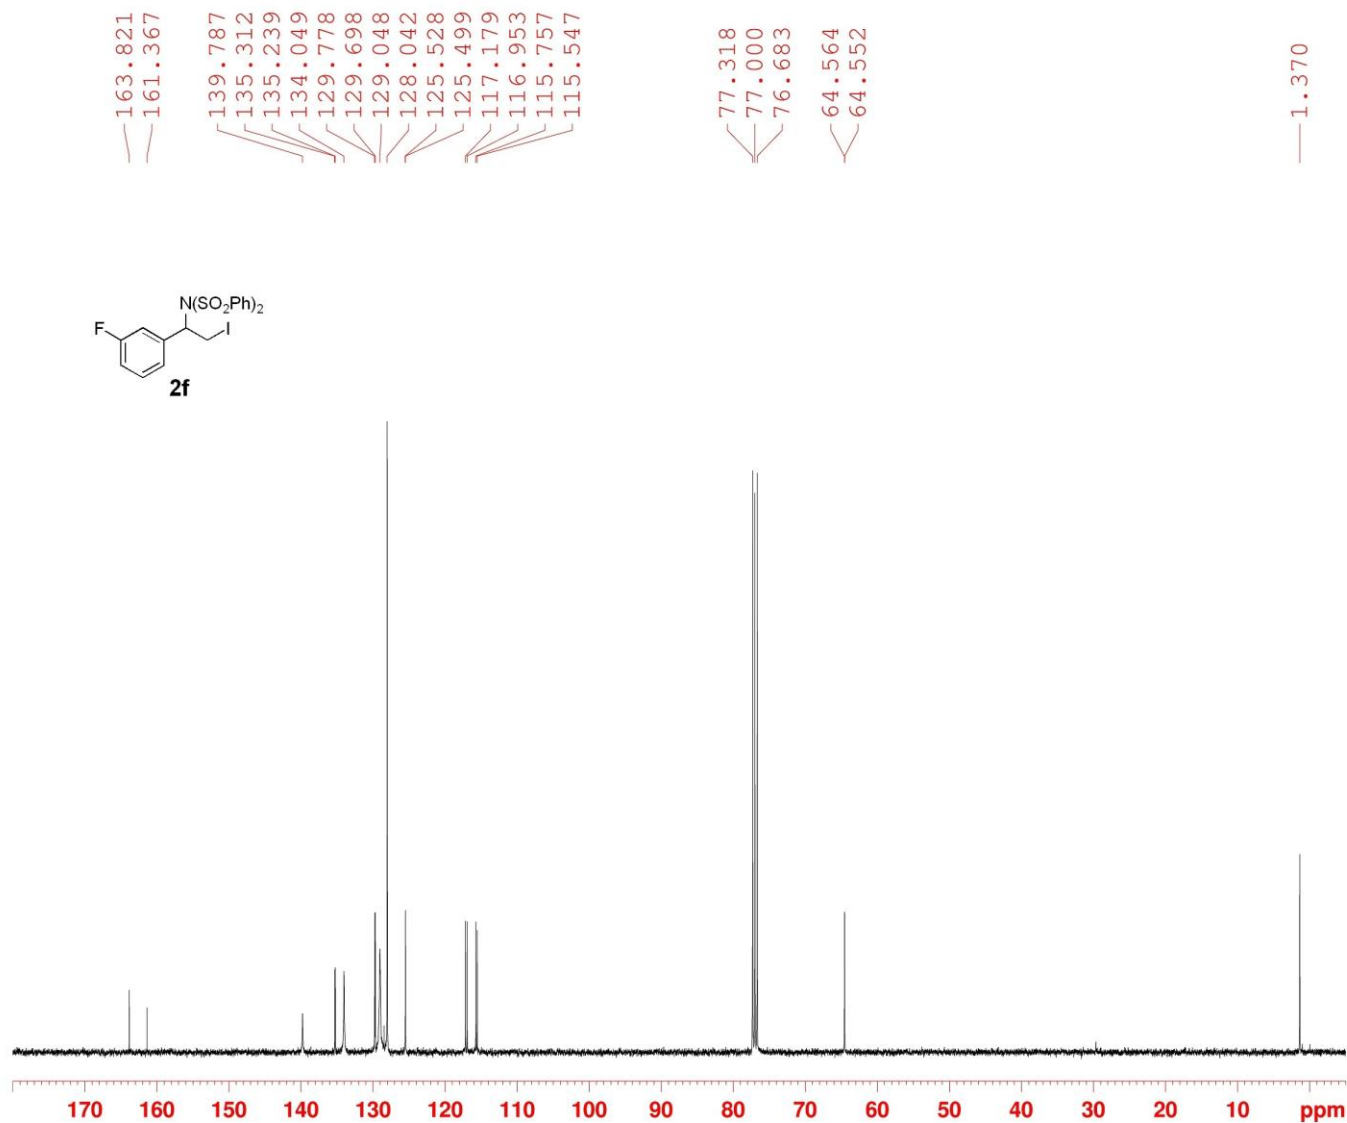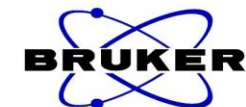

NAME CLJ-WL-L241  
 EXPNO 2  
 PROCNO 1  
 Date\_ 20180427  
 Time 6.53  
 INSTRUM spect  
 PROBHD 5 mm PABBO BB/  
 PULPROG zgpg30  
 TD 65536  
 SOLVENT CDCl3  
 NS 512  
 DS 0  
 SWH 24038.461 Hz  
 FIDRES 0.366798 Hz  
 AQ 1.3631988 sec  
 RG 194.26  
 DW 20.800 usec  
 DE 6.50 usec  
 TE 300.0 K  
 D1 2.00000000 sec  
 D11 0.03000000 sec  
 TD0 1

===== CHANNEL f1 =====  
 SFO1 100.6228293 MHz  
 NUC1 13C  
 P1 8.54 usec  
 SI 32768  
 SF 100.6127735 MHz  
 WDW EM  
 SSB 0  
 LB 1.00 Hz  
 GB 0  
 PC 1.40



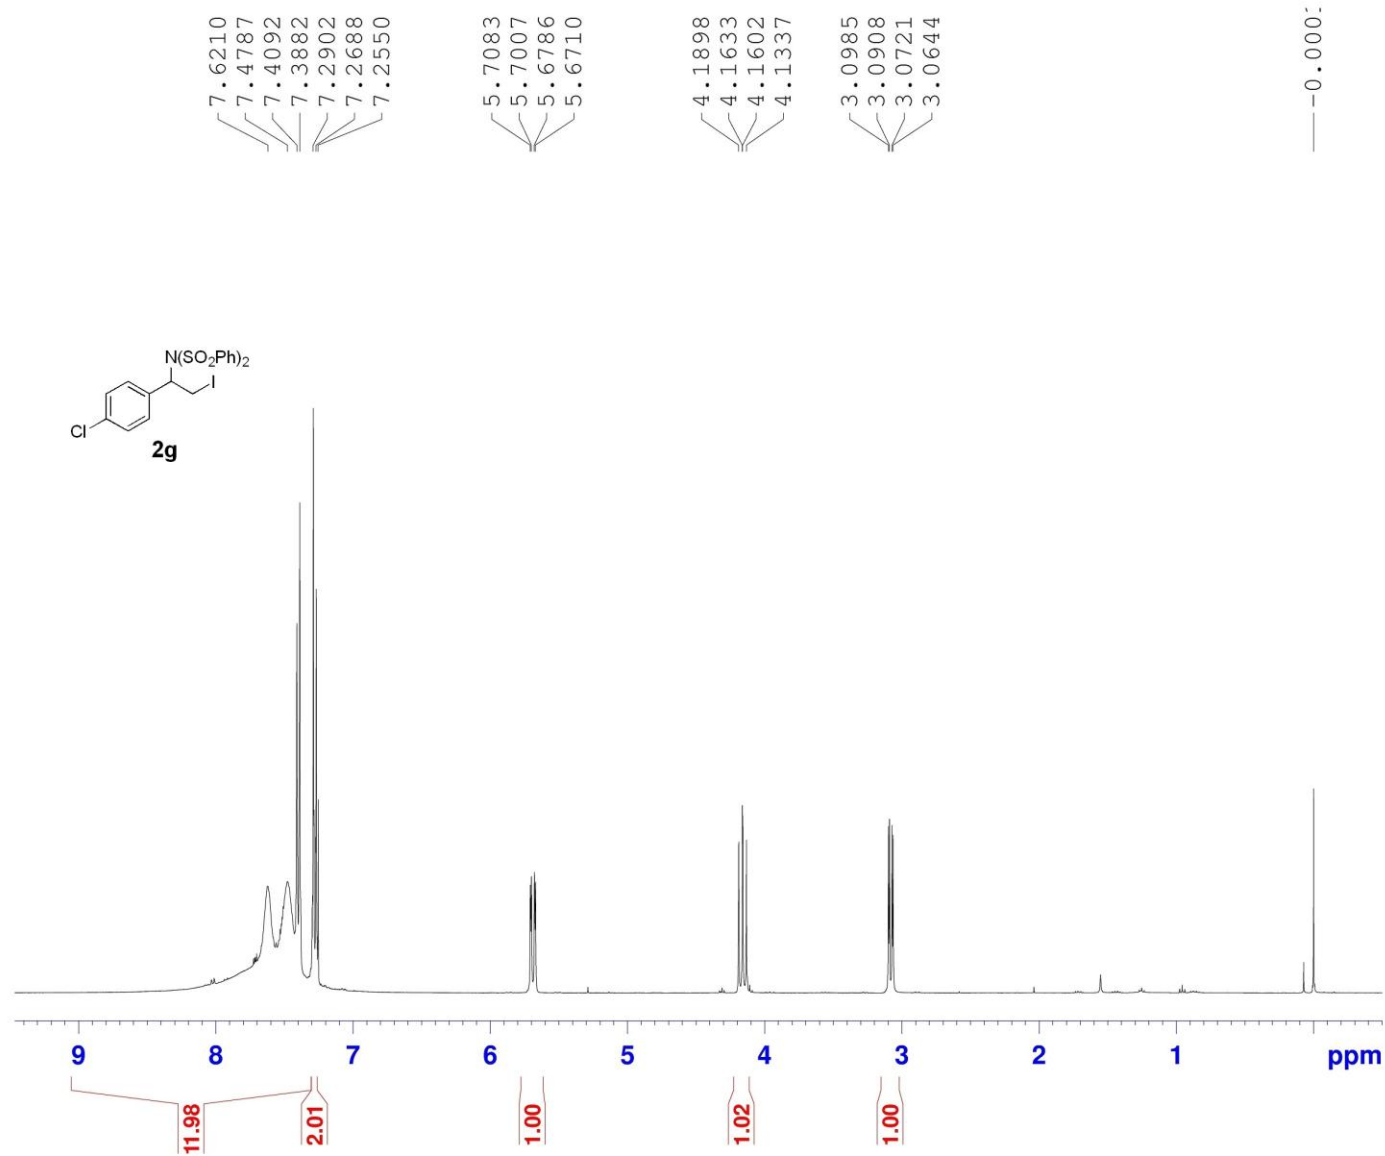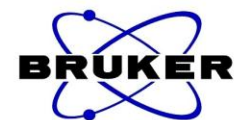

```

NAME      CLJ-WL-L222
EXPNO     1
PROCNO    1
Date_     20180412
Time      13.23
INSTRUM   spect
PROBHD    5 mm PABBO BB/
PULPROG   zg30
TD        65536
SOLVENT   CDCl3
NS         12
DS         0
SWH        8012.820 Hz
FIDRES     0.122266 Hz
AQ         4.0894966 sec
RG         63
DW         62.400 usec
DE         6.50 usec
TE         300.0 K
D1         1.00000000 sec
TD0        1

```

```

===== CHANNEL f1 =====
SFO1      400.1324710 MHz
NUC1      1H
P1        8.04 usec
SI        65536
SF        400.1300113 MHz
WDW       EM
SSB       0
LB        0.30 Hz
GB        0
PC        1.00

```

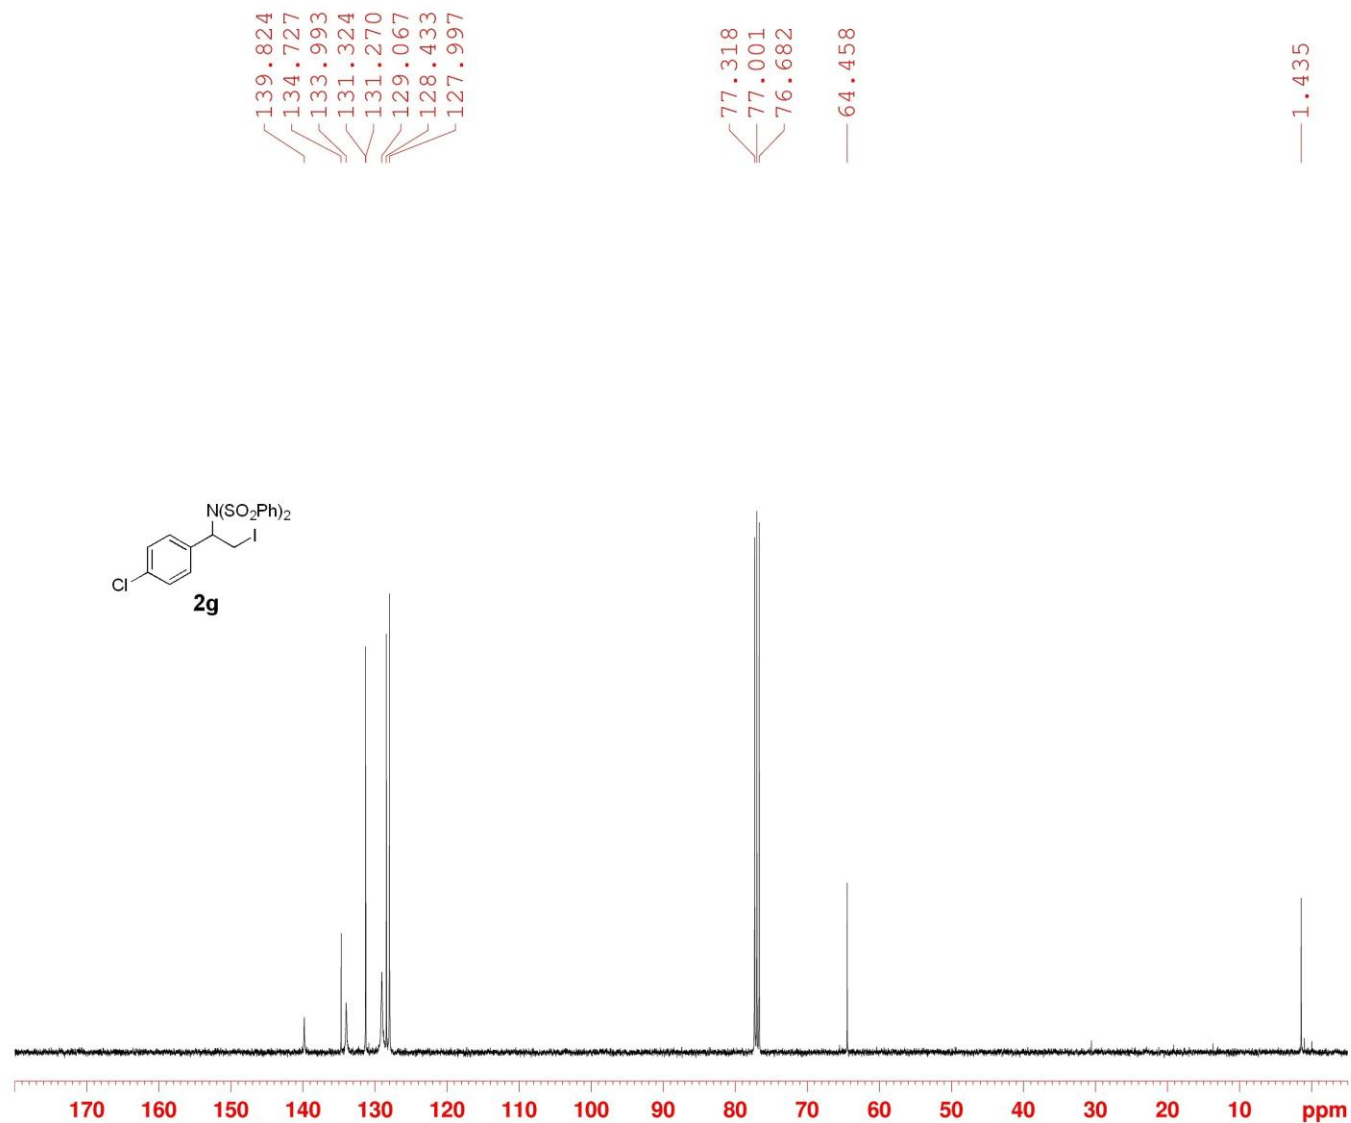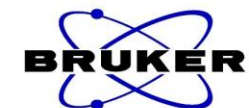

NAME CLJ-WL-L222  
 EXPNO 2  
 PROCNO 1  
 Date\_ 20180412  
 Time 13.53  
 INSTRUM spect  
 PROBHD 5 mm PABBO BB/  
 PULPROG zgpg30  
 TD 65536  
 SOLVENT CDCl3  
 NS 512  
 DS 0  
 SWH 24038.461 Hz  
 FIDRES 0.366798 Hz  
 AQ 1.3631988 sec  
 RG 194.26  
 DW 20.800 usec  
 DE 6.50 usec  
 TE 300.0 K  
 D1 2.00000000 sec  
 D11 0.03000000 sec  
 TD0 1

===== CHANNEL f1 =====  
 SFO1 100.6228293 MHz  
 NUC1 13C  
 P1 8.54 usec  
 SI 32768  
 SF 100.6127730 MHz  
 WDW EM  
 SSB 0  
 LB 1.00 Hz  
 GB 0  
 PC 1.40

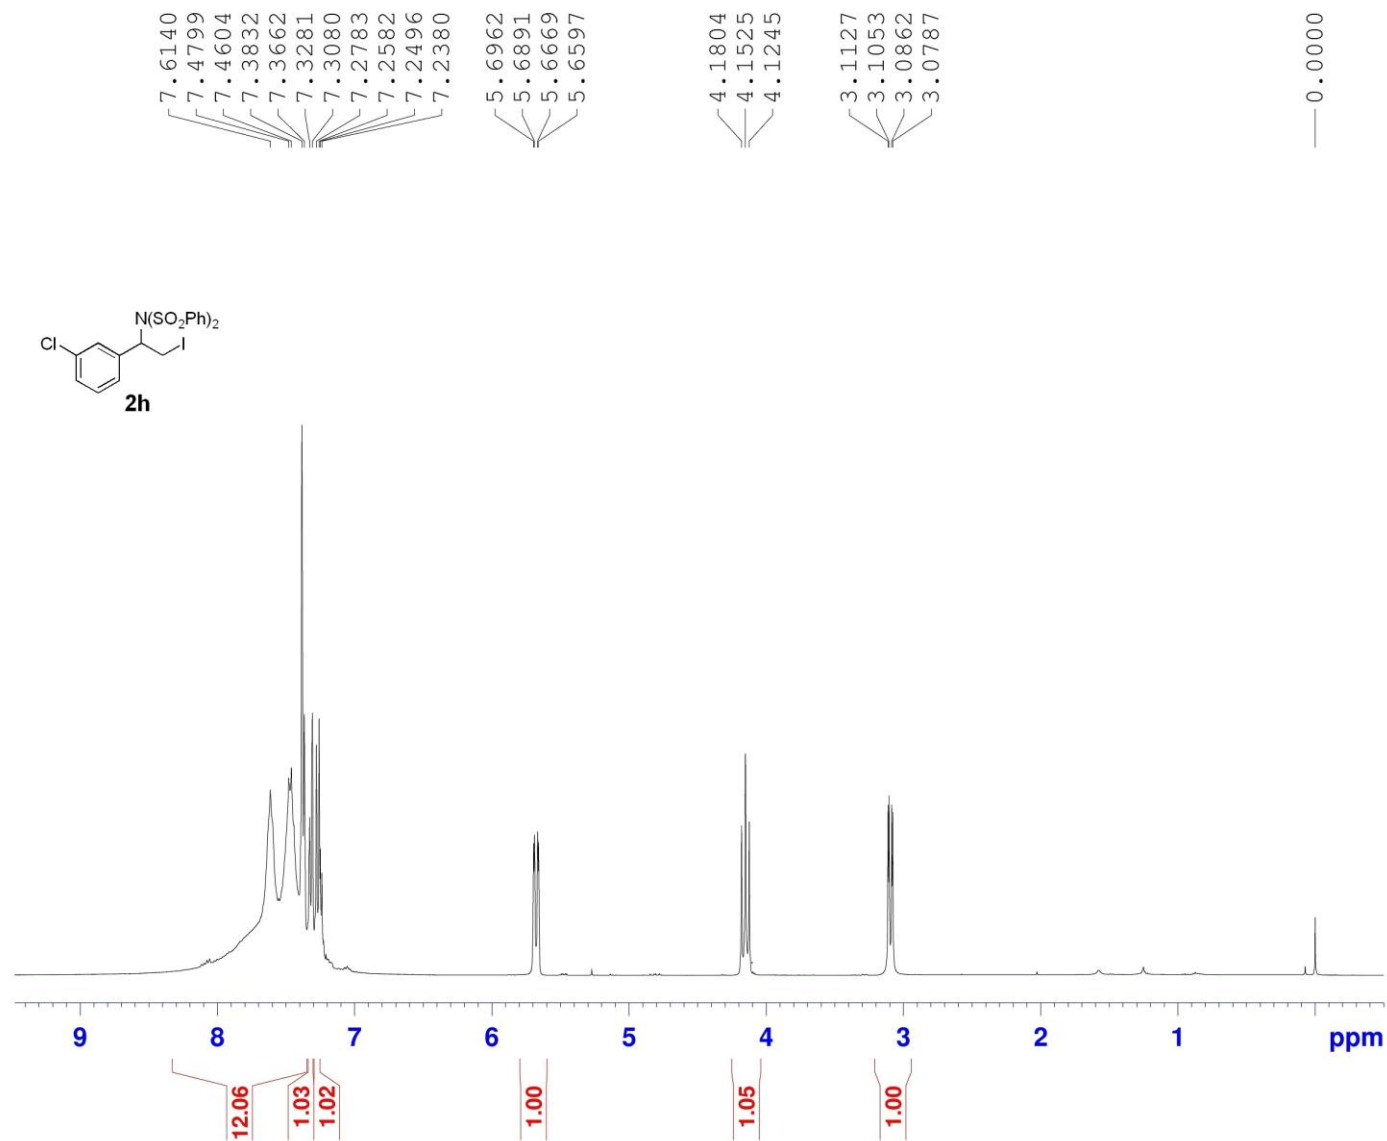

```

NAME      CLJ-WL-L245
EXPNO     1
PROCNO    1
Date_     20180429
Time      10.43
INSTRUM   spect
PROBHD    5 mm PABBO BB/
PULPROG   zg30
TD        65536
SOLVENT   CDCl3
NS         12
DS         0
SWH        8012.820 Hz
FIDRES     0.122266 Hz
AQ         4.0894966 sec
RG         41.07
DW         62.400 usec
DE         6.50 usec
TE         300.0 K
D1         1.00000000 sec
TD0        1
  
```

```

===== CHANNEL f1 =====
SFO1      400.1324710 MHz
NUC1      1H
P1        8.04 usec
SI        65536
SF        400.1300141 MHz
WDW       EM
SSB       0
LB        0.30 Hz
GB        0
PC        1.00
  
```

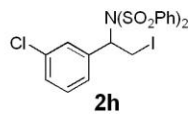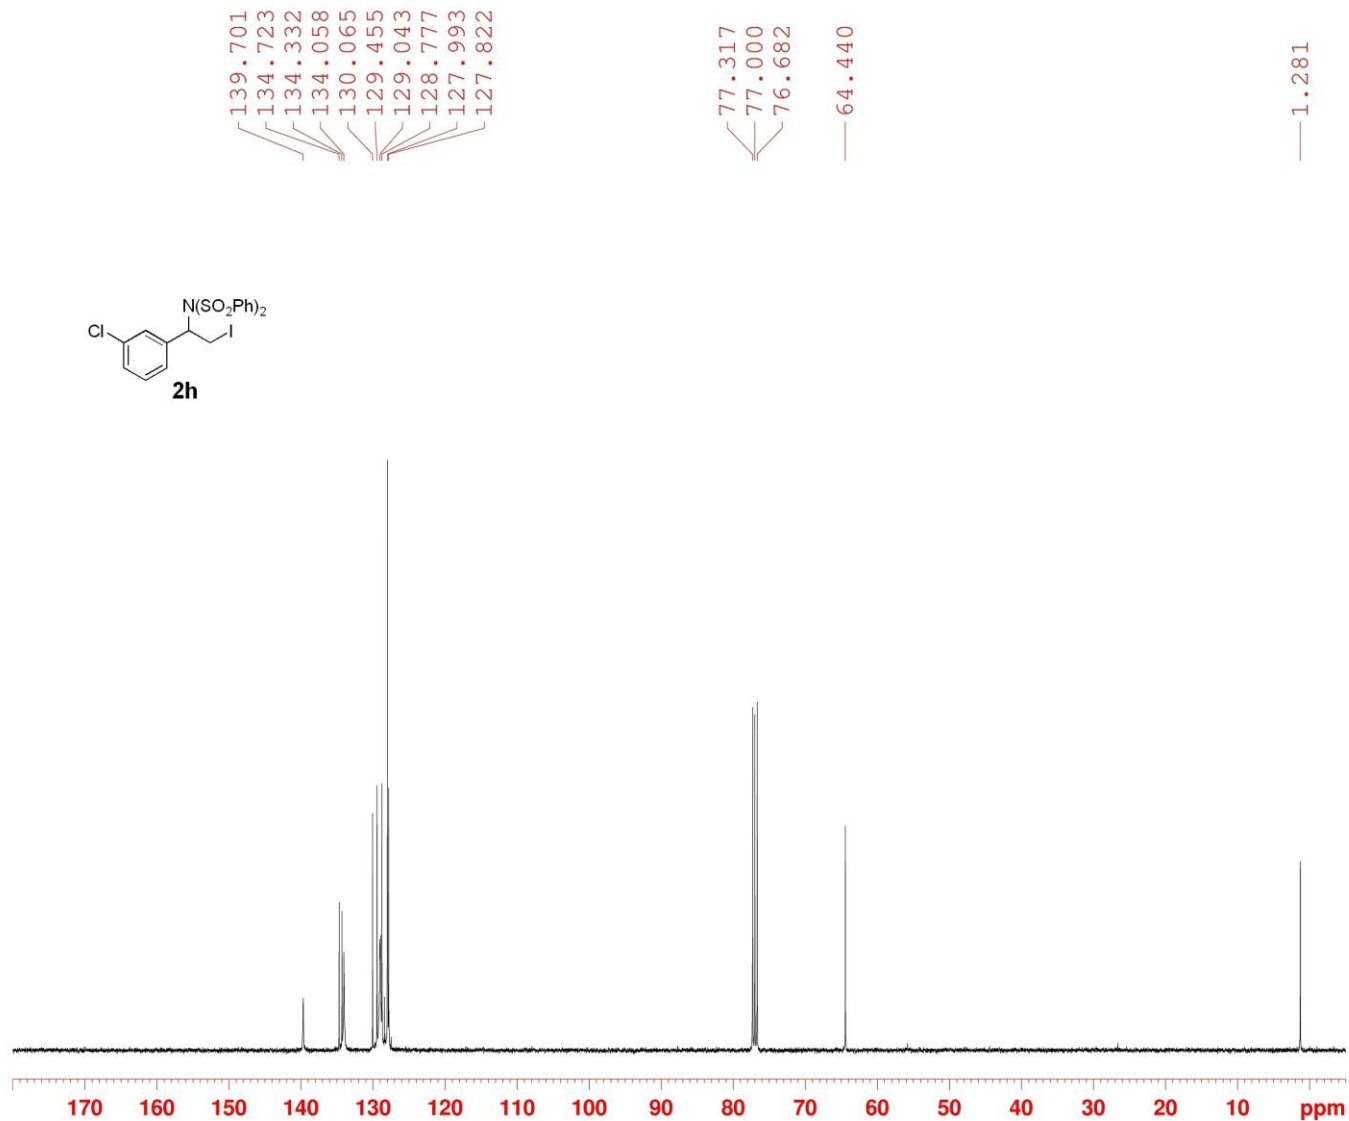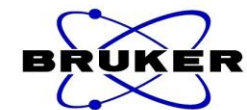

NAME CLJ-WL-L245  
EXPNO 2  
PROCNO 1  
Date\_ 20180429  
Time 11.14  
INSTRUM spect  
PROBHD 5 mm PABBO BB/  
PULPROG zgpg30  
TD 65536  
SOLVENT CDCl3  
NS 512  
DS 0  
SWH 24038.461 Hz  
FIDRES 0.366798 Hz  
AQ 1.3631988 sec  
RG 194.26  
DW 20.800 usec  
DE 6.50 usec  
TE 300.0 K  
D1 2.00000000 sec  
D11 0.03000000 sec  
TD0 1

===== CHANNEL f1 =====  
SFO1 100.6228293 MHz  
NUC1 13C  
P1 8.54 usec  
SI 32768  
SF 100.6127773 MHz  
WDW EM  
SSB 0  
LB 1.00 Hz  
GB 0  
PC 1.40

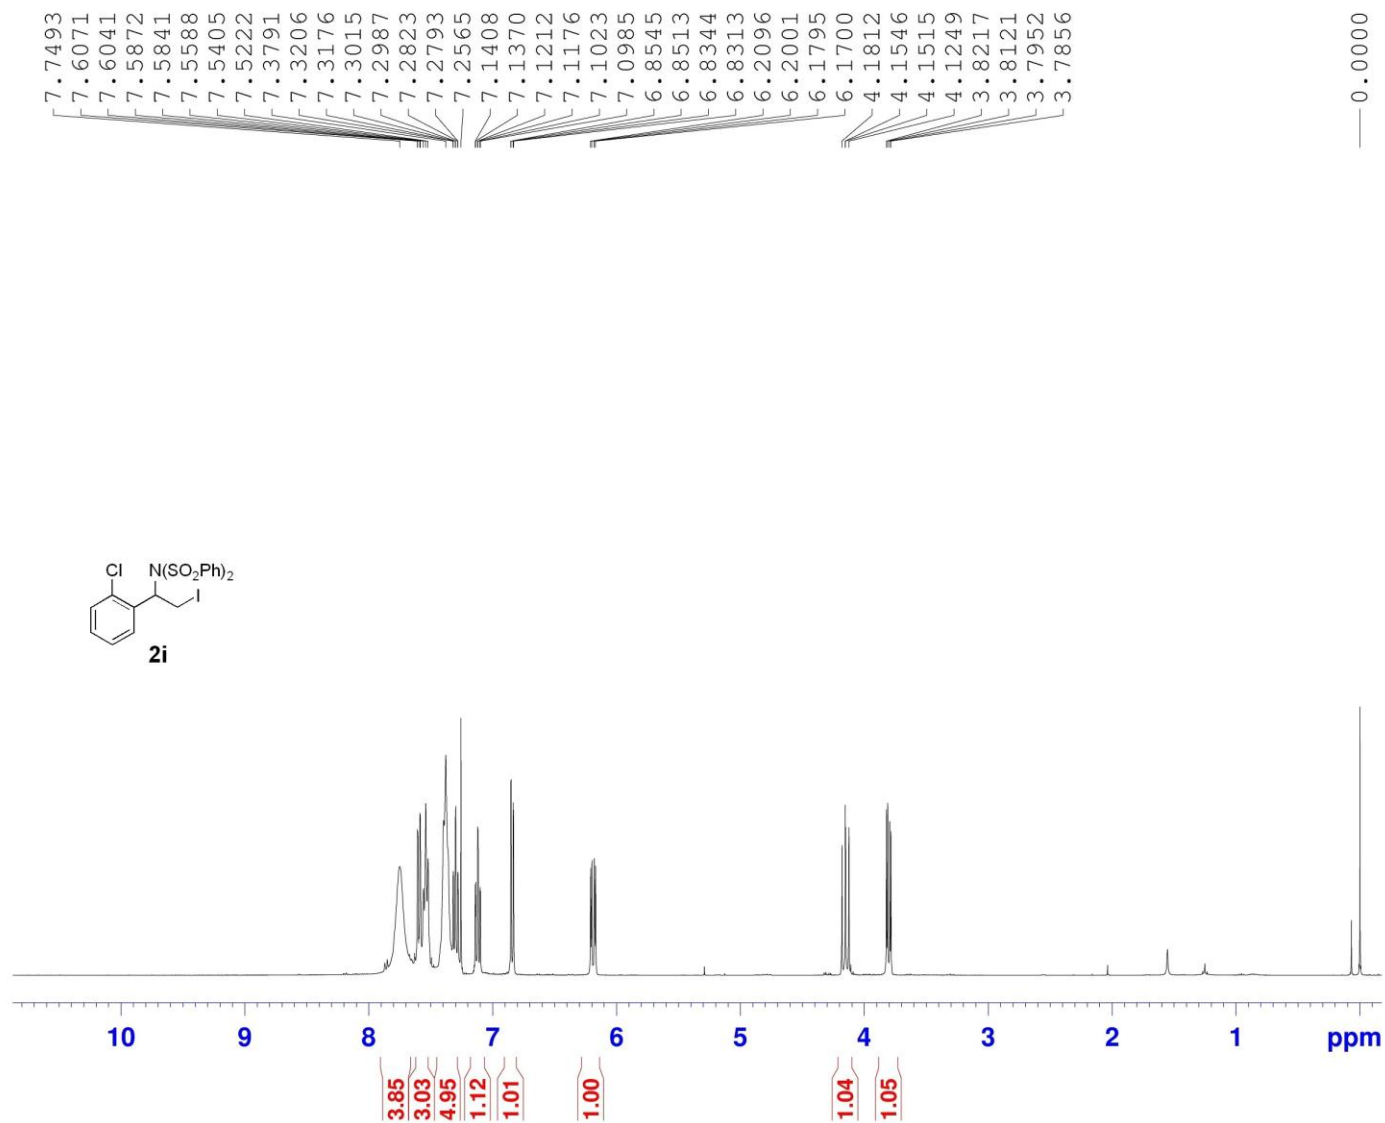

— 0.0000



NAME CLJ-WL-L236  
 EXPNO 1  
 PROCNO 1  
 Date\_ 20180421  
 Time 12.32  
 INSTRUM spect  
 PROBHD 5 mm PABBO BB/  
 PULPROG zg30  
 TD 65536  
 SOLVENT CDCl3  
 NS 12  
 DS 0  
 SWH 8012.820 Hz  
 FIDRES 0.122266 Hz  
 AQ 4.0894966 sec  
 RG 70.36  
 DW 62.400 usec  
 DE 6.50 usec  
 TE 300.0 K  
 D1 1.00000000 sec  
 TDO 1

===== CHANNEL f1 =====  
 SF01 400.1324710 MHz  
 NUC1 1H  
 P1 8.04 usec  
 S1 65536  
 SF 400.1300112 MHz  
 WDW EM  
 SSB 0  
 LB 0.30 Hz  
 GB 0  
 PC 1.00

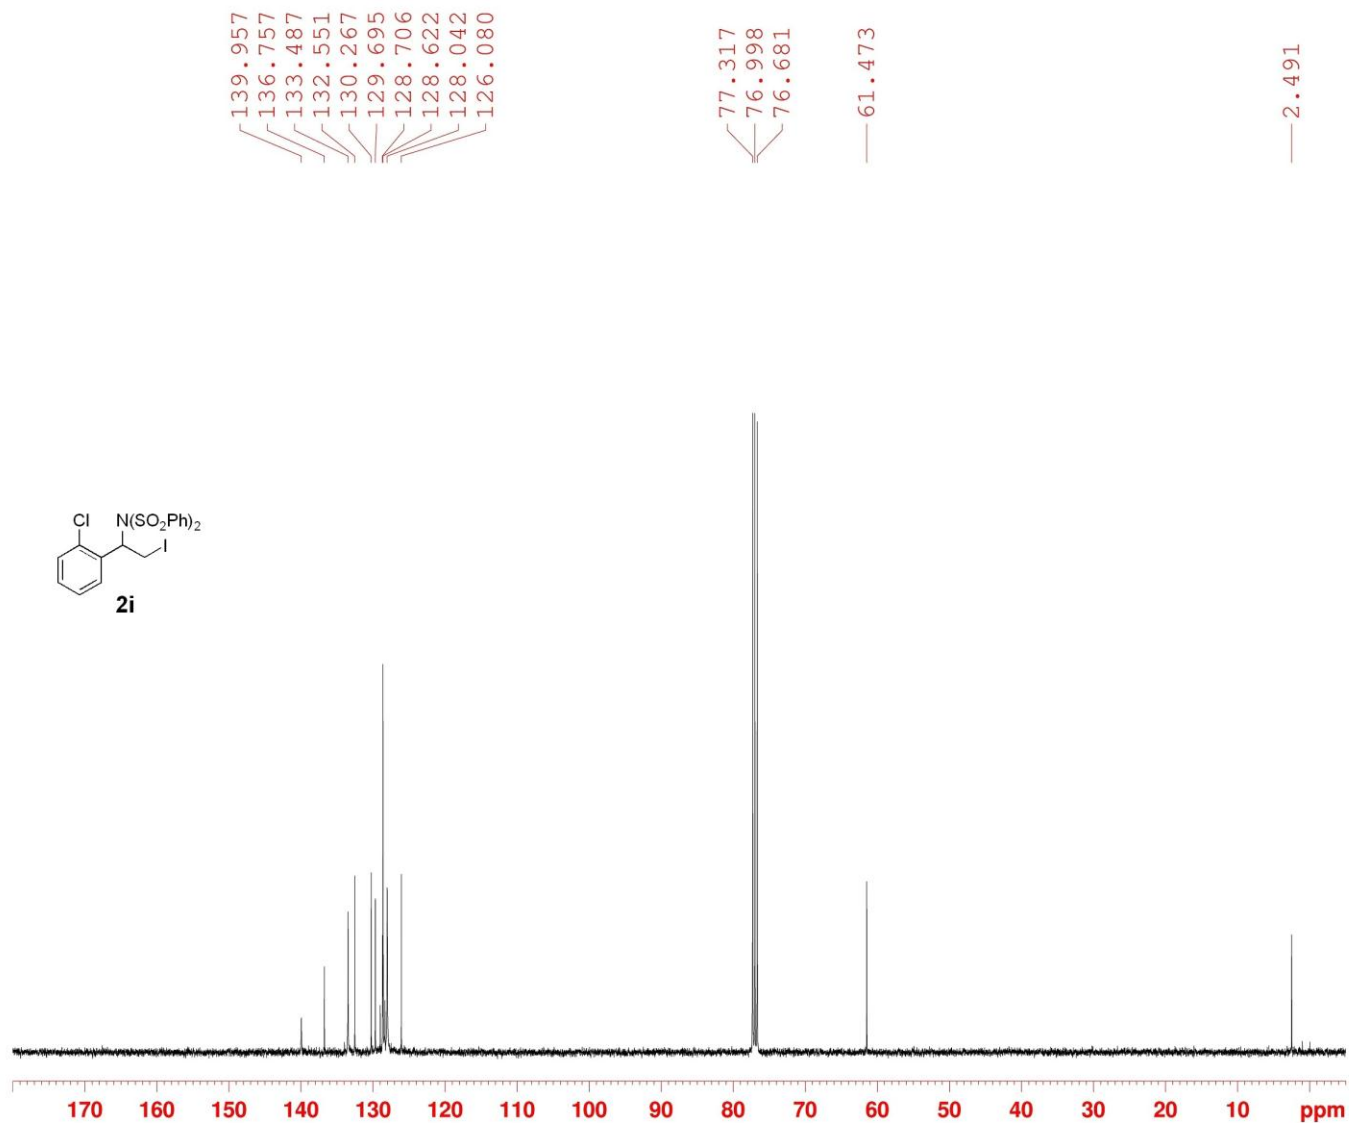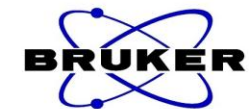

```

NAME      CLJ-WL-L236
EXPNO     2
PROCNO    1
Date_     20180421
Time      13.02
INSTRUM   spect
PROBHD    5 mm PABBO BB/
PULPROG   zgpg30
TD        65536
SOLVENT   CDCl3
NS        512
DS        0
SWH       24038.461 Hz
FIDRES    0.366798 Hz
AQ        1.3631988 sec
RG        194.26
DW        20.800 usec
DE        6.50 usec
TE        300.0 K
D1        2.00000000 sec
D11       0.03000000 sec
TD0       1
  
```

```

===== CHANNEL f1 =====
SFO1      100.6228293 MHz
NUC1      13C
P1        8.54 usec
SI        32768
SF        100.6127727 MHz
WDW       EM
SSB       0
LB        1.00 Hz
GB        0
PC        1.40
  
```

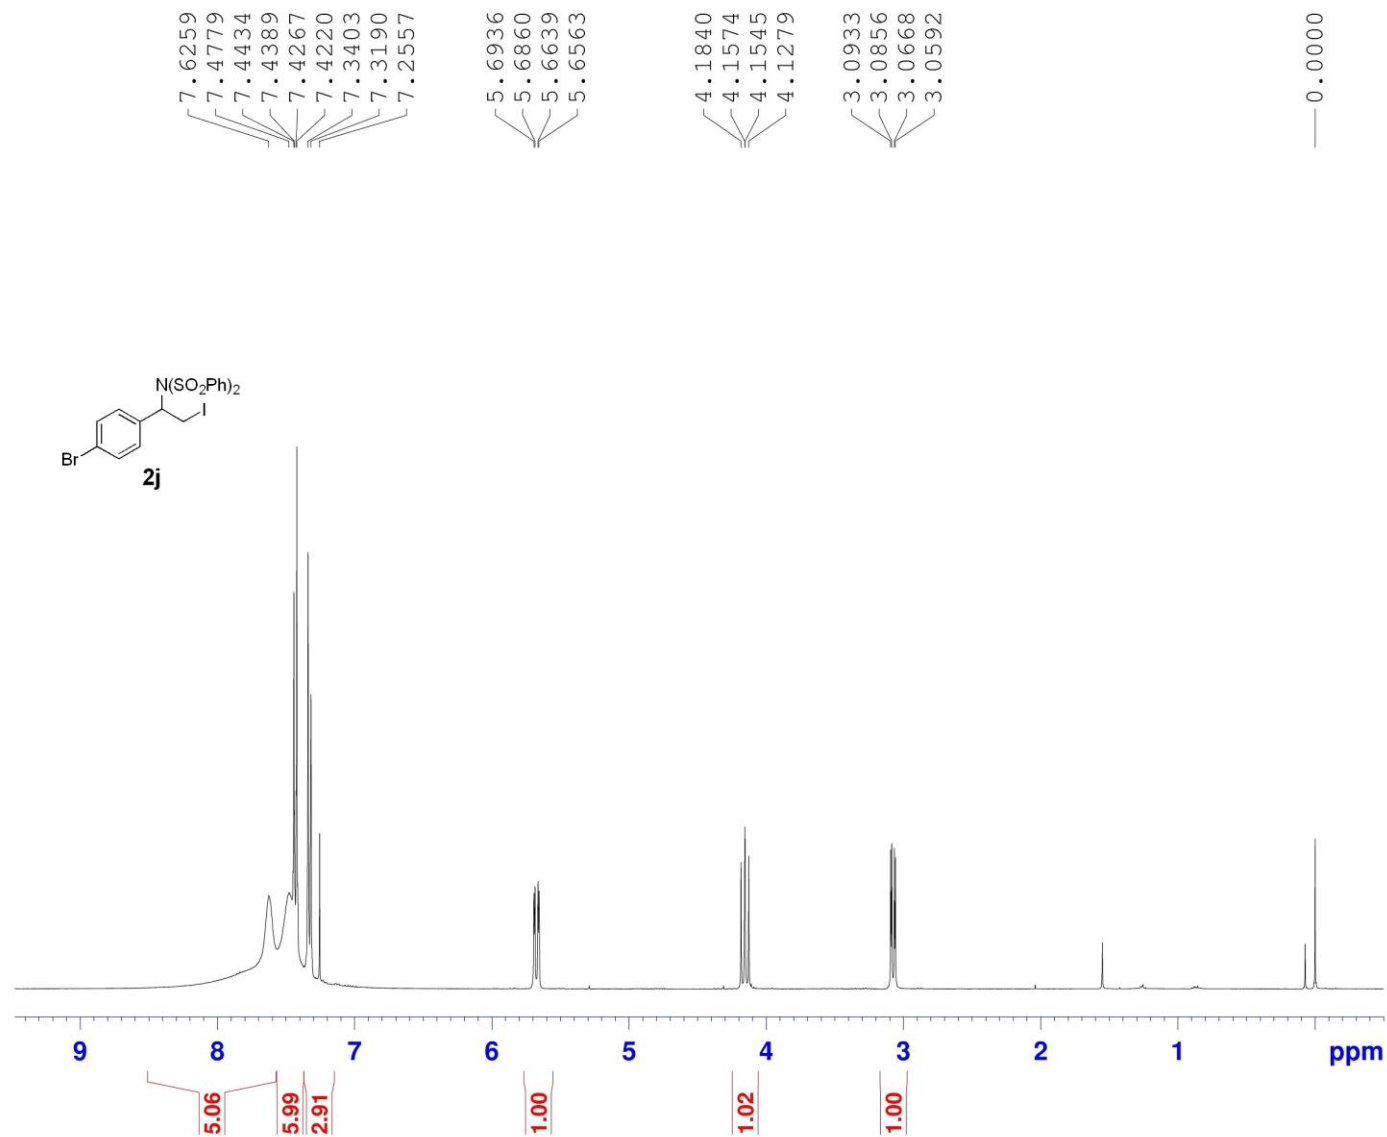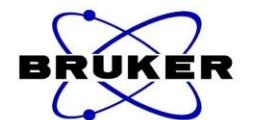

```

NAME      CLJ-WL-L232
EXPNO     1
PROCNO    1
Date_     20180418
Time      23.47
INSTRUM   spect
PROBHD    5 mm PABBO BB/
PULPROG   zg30
TD        65536
SOLVENT   CDCl3
NS         12
DS         0
SWH        8012.820 Hz
FIDRES     0.122266 Hz
AQ         4.0894966 sec
RG         63
DW         62.400 usec
DE         6.50 usec
TE         300.0 K
D1         1.00000000 sec
TD0        1
  
```

```

===== CHANNEL f1 =====
SF01      400.1324710 MHz
NUC1       1H
P1         8.04 usec
S1         65536
SF         400.1300114 MHz
WDW        EM
SSB        0
LB         0.30 Hz
GB         0
PC         1.00
  
```

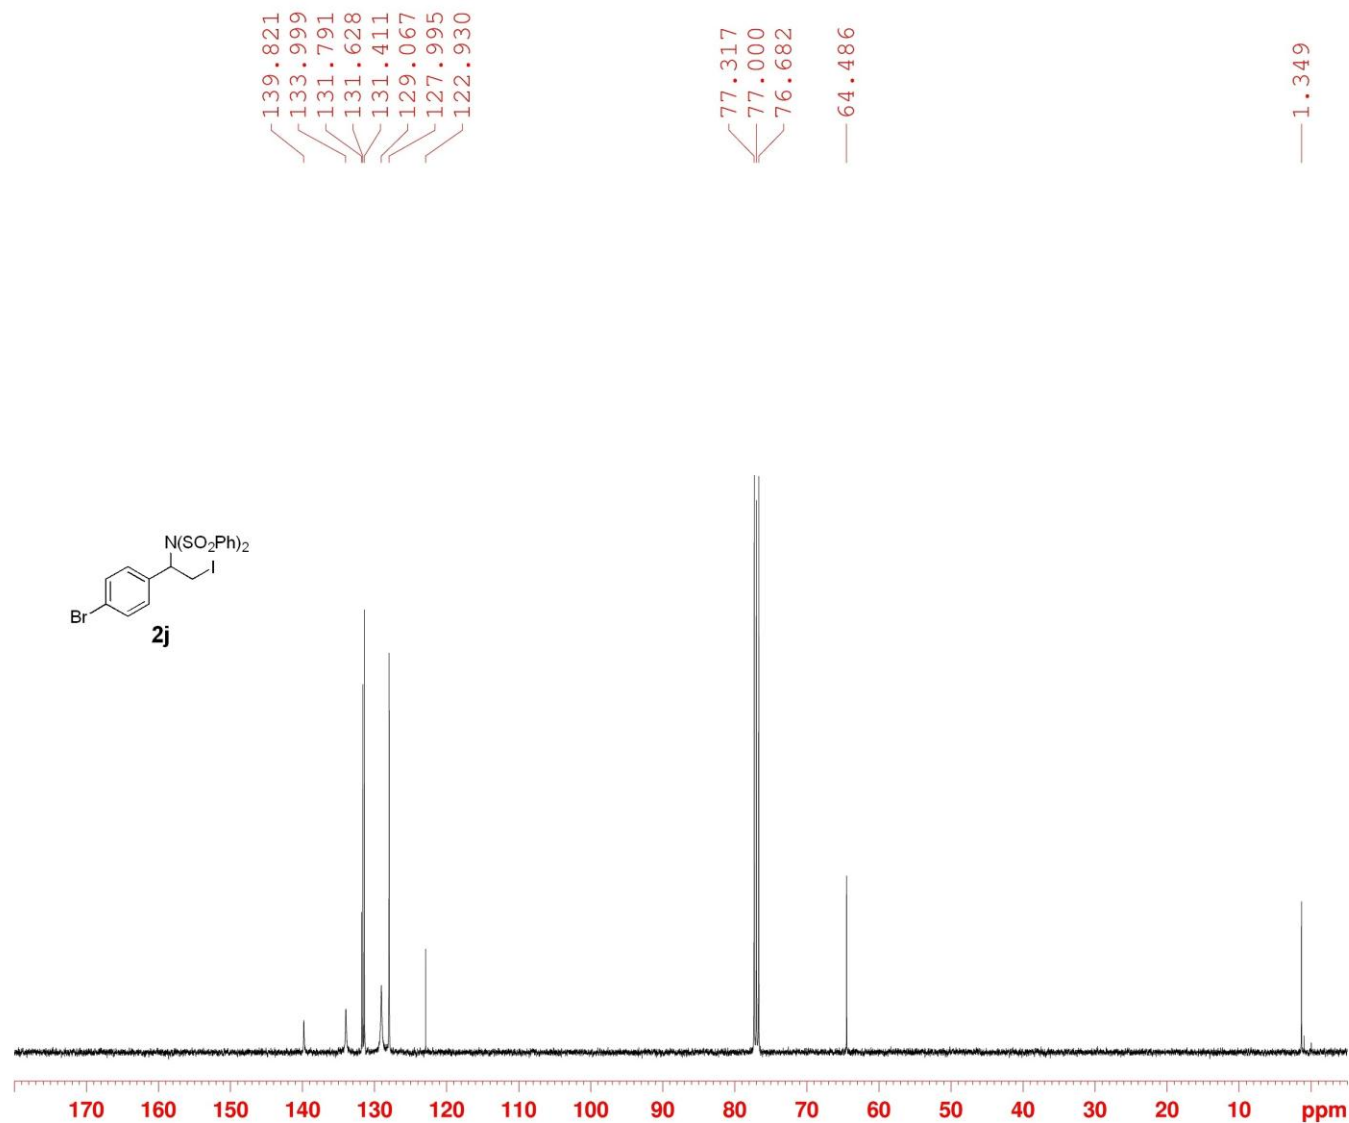

```

NAME      CLJ-WL-L232
EXPNO     2
PROCNO    1
Date_     20180419
Time      0.17
INSTRUM   spect
PROBHD    5 mm PABBO BB/
PULPROG   zgpg30
TD        65536
SOLVENT   CDCl3
NS        512
DS        0
SWH       24038.461 Hz
FIDRES    0.366798 Hz
AQ        1.3631988 sec
RG        194.26
DW        20.800 usec
DE        6.50 usec
TE        300.0 K
D1        2.00000000 sec
D11       0.03000000 sec
TD0       1
  
```

```

===== CHANNEL f1 =====
SFO1     100.6228293 MHz
NUC1      13C
P1        8.54 usec
SI        32768
SF        100.6127728 MHz
WDW       EM
SSB       0
LB        1.00 Hz
GB        0
PC        1.40
  
```



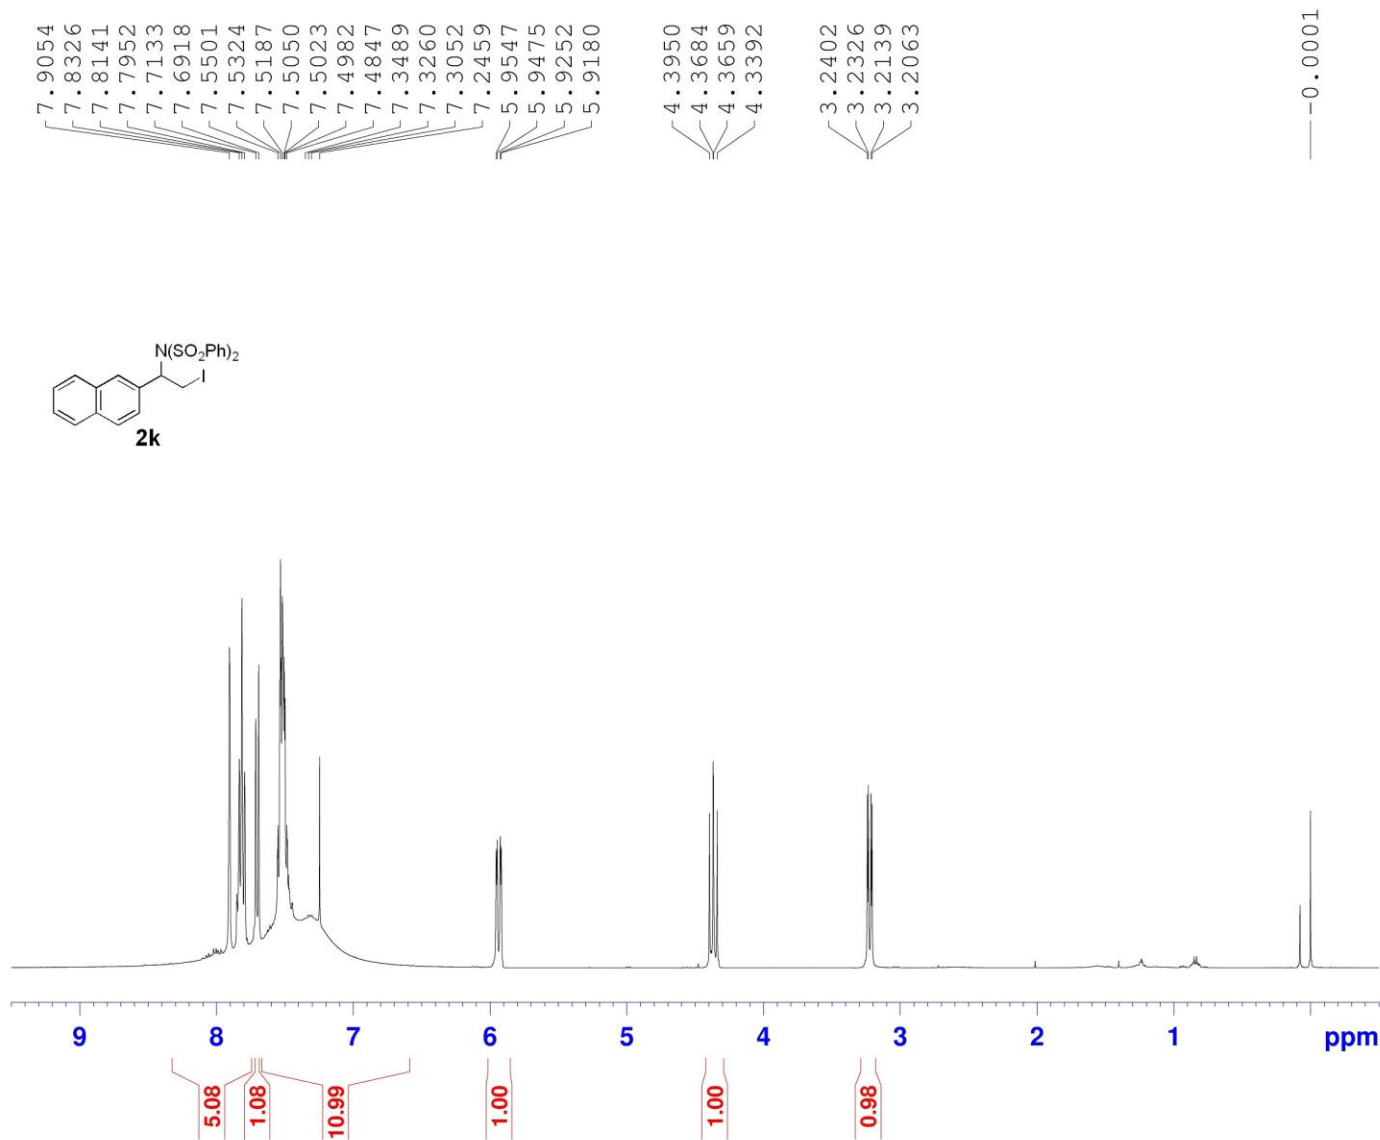

**BRUKER**

```

NAME      CLJ-WL-L261
EXPNO     1
PROCNO    1
Date_     20180512
Time      23.34
INSTRUM   spect
PROBHD    5 mm PABBO BB/
PULPROG   zg30
TD        65536
SOLVENT   CDC13
NS        12
DS        0
SWH       8012.820 H
FIDRES    0.122266 H
AQ        4.0894966 s
RG        51.19
DW        62.400 u
DE        6.50 u
TE        300.0 K
D1        1.00000000 s
TD0       1

===== CHANNEL f1 =====
SFO1      400.1324710 M
NUC1      1H
P1        8.04 u
SI        65536
SF        400.1300153 M
WDW       EM
SSB       0
LB        0.30 H
GB        0
PC        1.00

```

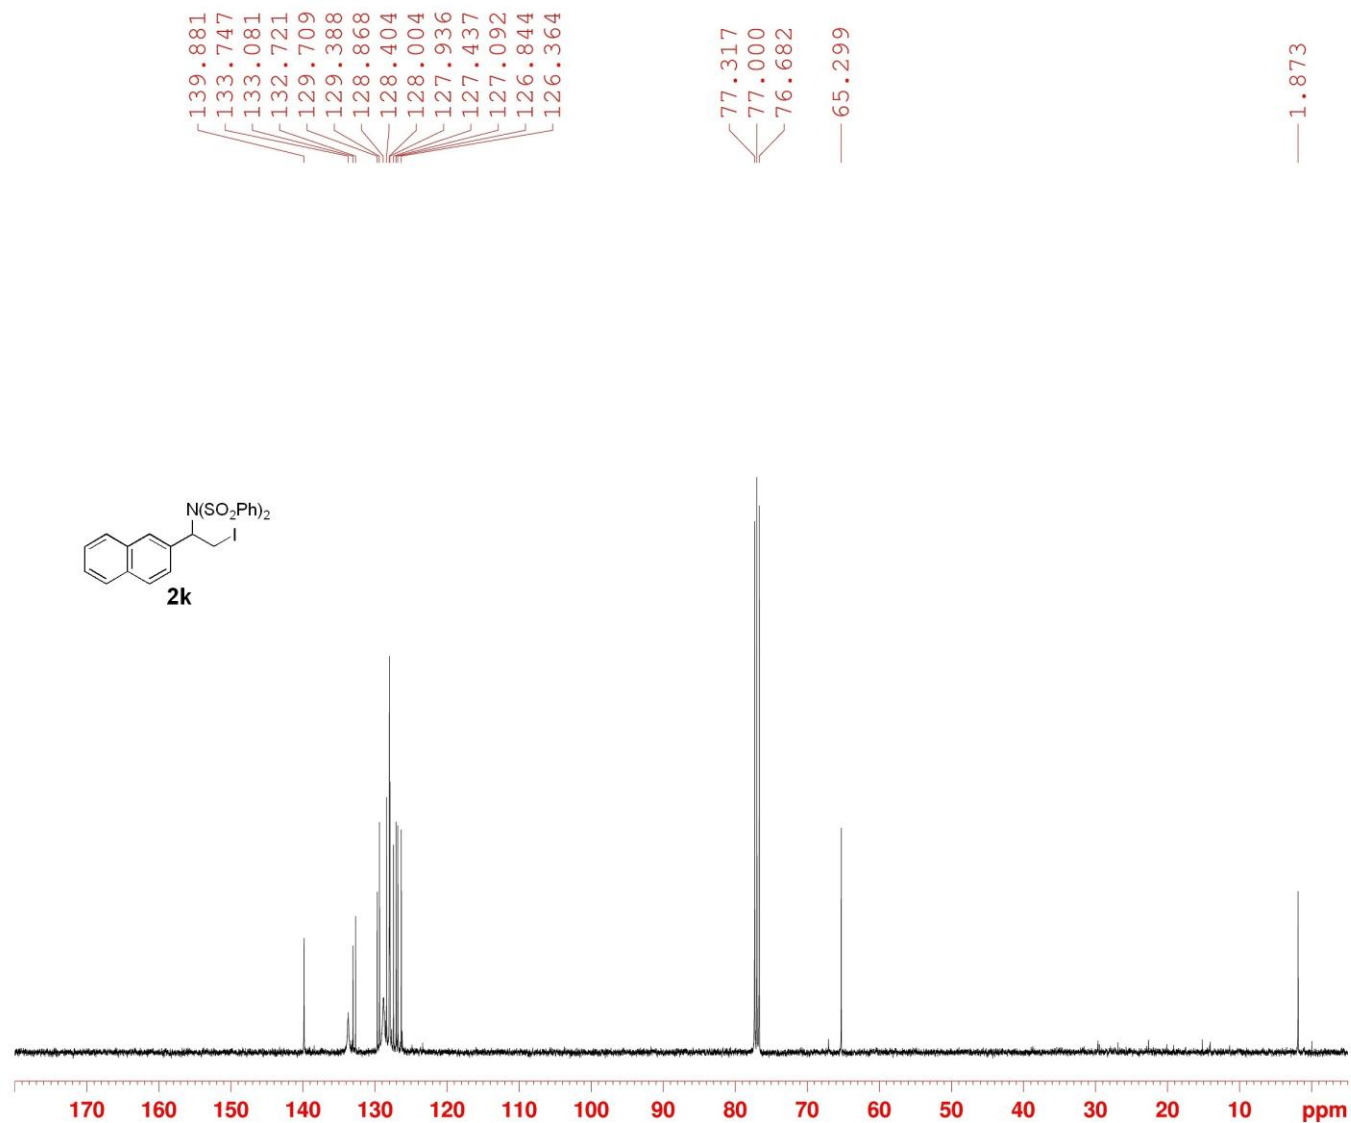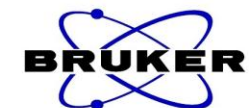

```

NAME      CLJ-WL-L261
EXPNO     2
PROCNO    1
Date_     20180513
Time      0.04
INSTRUM   spect
PROBHD    5 mm PABBO BB/
PULPROG   zgpg30
TD        65536
SOLVENT   CDCl3
NS        512
DS        0
SWH       24038.461 Hz
FIDRES    0.366798 Hz
AQ        1.3631988 sec
RG        194.26
DW        20.800 usec
DE        6.50 usec
TE        300.0 K
D1        2.00000000 sec
D11       0.03000000 sec
TD0       1
  
```

```

===== CHANNEL f1 =====
SFO1      100.6228293 MHz
NUC1      13C
P1        8.54 usec
SI        32768
SF        100.6127746 MHz
WDW       EM
SSB       0
LB        1.00 Hz
GB        0
PC        1.40
  
```

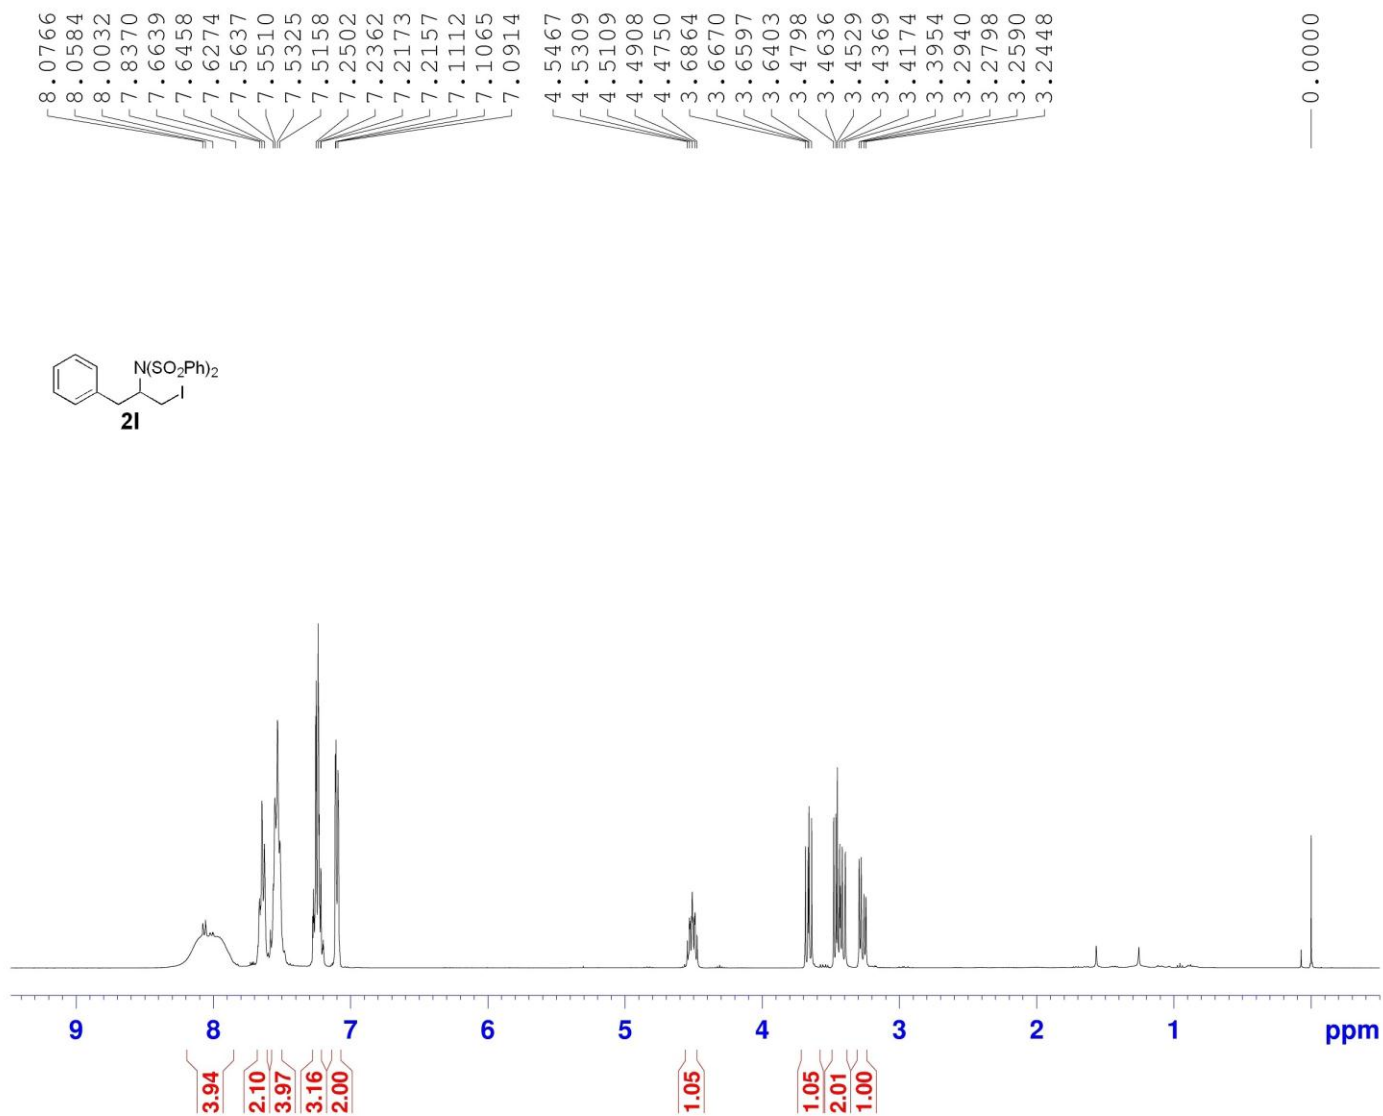

NAME CLJ-WL-L307  
 EXPNO 1  
 PROCNO 1  
 Date\_ 20180620  
 Time 4.00  
 INSTRUM spect  
 PROBHD 5 mm PABBO BB/  
 PULPROG zg30  
 TD 65536  
 SOLVENT CDCl3  
 NS 12  
 DS 0  
 SWH 8012.820 Hz  
 FIDRES 0.122266 Hz  
 AQ 4.0894966 sec  
 RG 51.19  
 DW 62.400 usec  
 DE 6.50 usec  
 TE 300.0 K  
 D1 1.00000000 sec  
 TDO 1

===== CHANNEL f1 =====  
 SF01 400.1324710 MHz  
 NUC1 1H  
 P1 8.04 usec  
 S1 65536  
 SF 400.1300135 MHz  
 WDW EM  
 SSB 0  
 LB 0.30 Hz  
 GB 0  
 PC 1.00

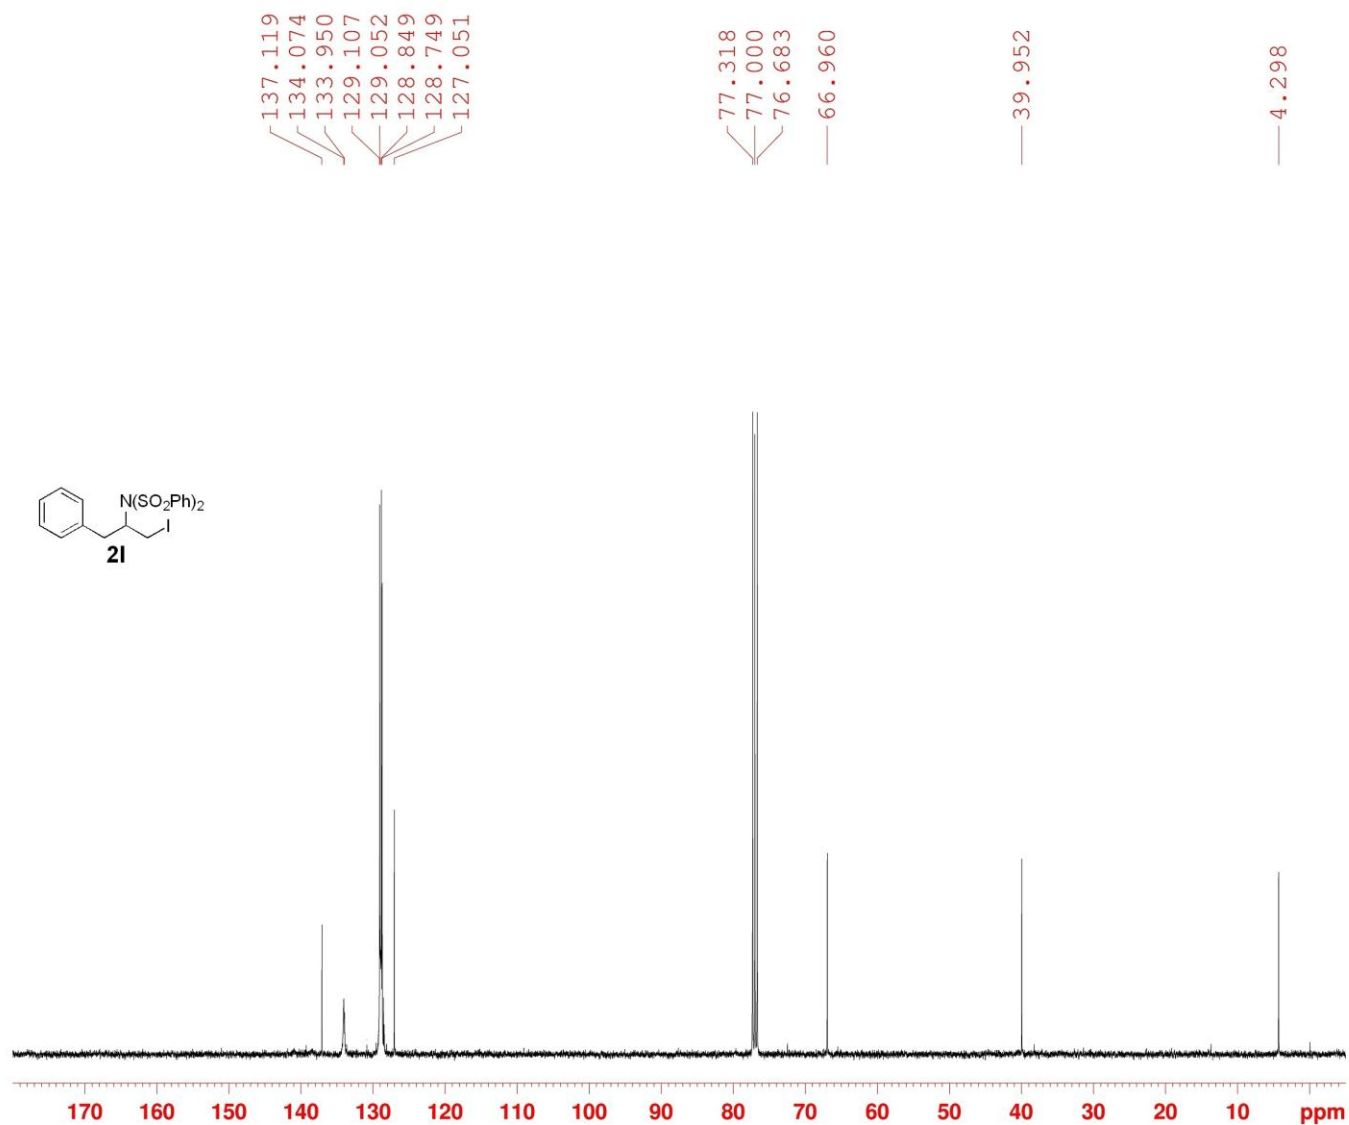

```

NAME      CLJ-WL-L307
EXPNO     2
PROCNO    1
Date_     20180620
Time      4.30
INSTRUM   spect
PROBHD    5 mm PABBO BB/
PULPROG   zgpg30
TD        65536
SOLVENT   CDCl3
NS        512
DS        0
SWH       24038.461 Hz
FIDRES    0.366798 Hz
AQ        1.3631988 sec
RG        194.26
DW        20.800 usec
DE        6.50 usec
TE        300.0 K
D1        2.00000000 sec
D11       0.03000000 sec
TD0       1
  
```

```

===== CHANNEL f1 =====
SFO1     100.6228293 MHz
NUC1     13C
P1       8.54 usec
SI       32768
SF       100.6127749 MHz
WDW      EM
SSB      0
LB       1.00 Hz
GB       0
PC       1.40
  
```

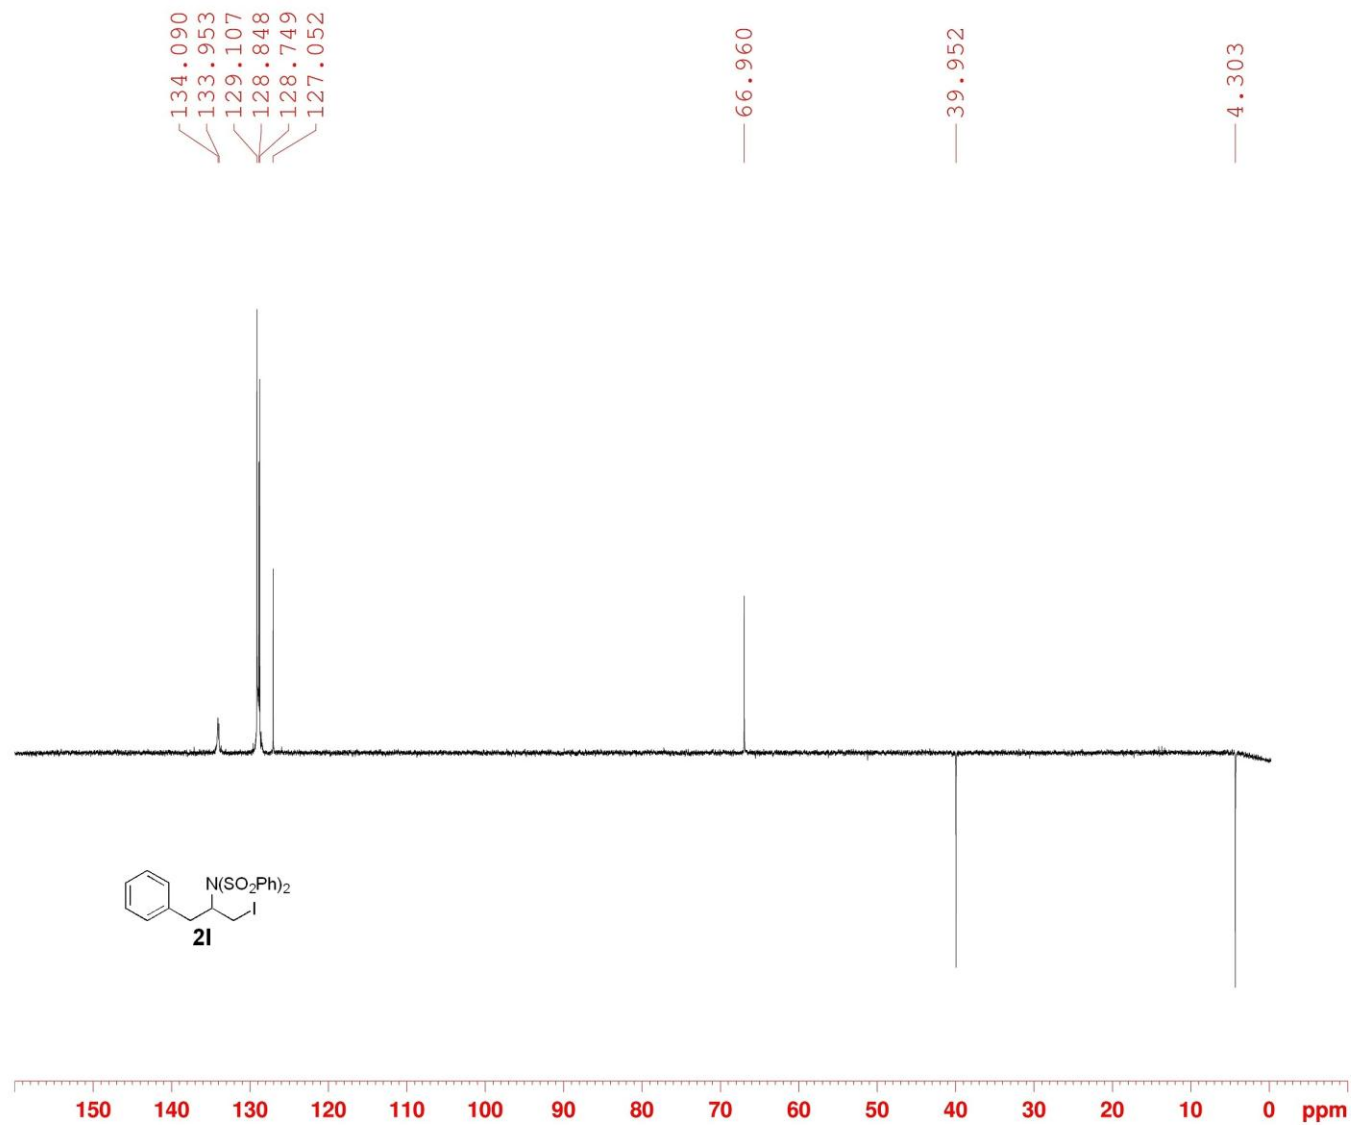

```

NAME      CLJ-WL-L319
EXPNO     1
PROCNO    1
Date_     20180622
Time      3.29
INSTRUM    spect
PROBHD     5 mm PABBO BB/
PULPROG    deptsp135
TD         65536
SOLVENT    CDCl3
NS         256
DS         4
SWH        16129.032 Hz
FIDRES     0.246110 Hz
AQ         2.0316660 sec
RG         194.26
DW         31.000 usec
DE         6.50 usec
TE         300.1 K
CNST2      145.0000000
D1         2.00000000 sec
D2         0.00344828 sec
D12        0.00002000 sec
TD0        1
  
```

```

===== CHANNEL f1 =====
SFO1      100.6208171 MHz
NUC1       13C
P1         8.54 usec
P13        2000.00 usec
SI         32768
SF         100.6127752 MHz
WDW        EM
SSB        0
LB         1.00 Hz
GB         0
PC         1.40
  
```

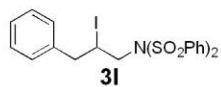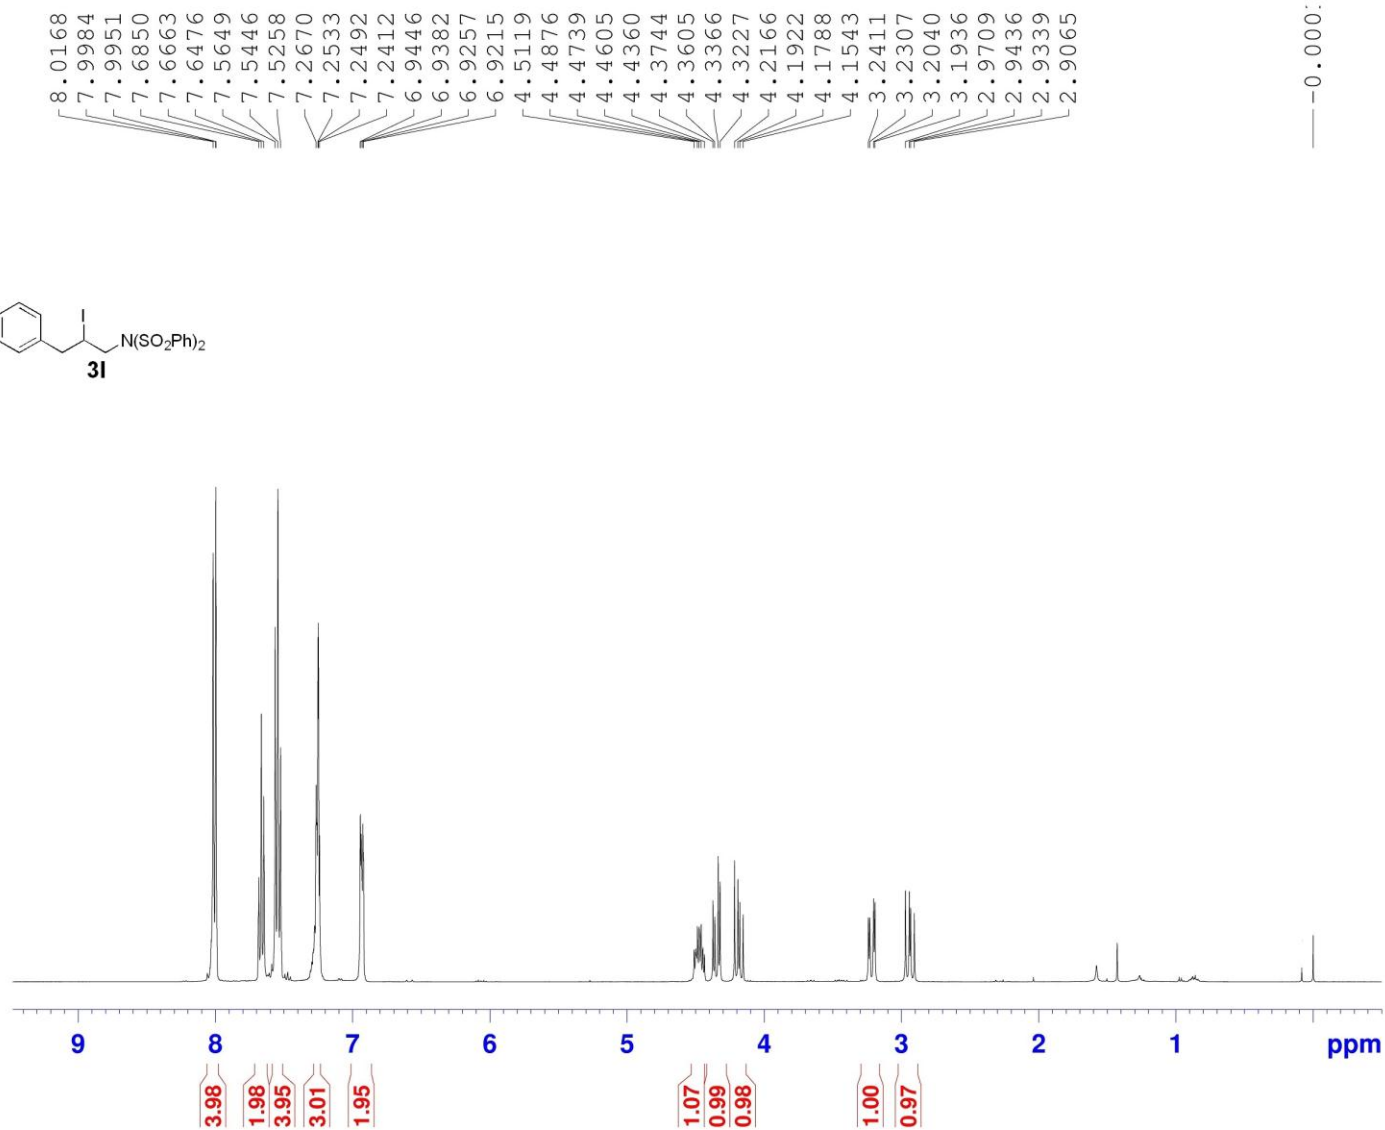

NAME CLJ-WL-L265  
EXPNO 1  
PROCNO 1  
Date\_ 20180513  
Time 1.18  
INSTRUM spect  
PROBHD 5 mm PABBO BB/  
PULPROG zg30  
TD 65536  
SOLVENT CDCl3  
NS 12  
DS 0  
SWH 8012.820 Hz  
FIDRES 0.122266 Hz  
AQ 4.0894966 sec  
RG 26.24  
DW 62.400 usec  
DE 6.50 usec  
TE 300.0 K  
D1 1.00000000 sec  
TD0 1

===== CHANNEL f1 =====  
SFO1 400.1324710 MHz  
NUC1 1H  
P1 8.04 usec  
SI 65536  
SF 400.1300173 MHz  
WDW EM  
SSB 0  
LB 0.30 Hz  
GB 0  
PC 1.00

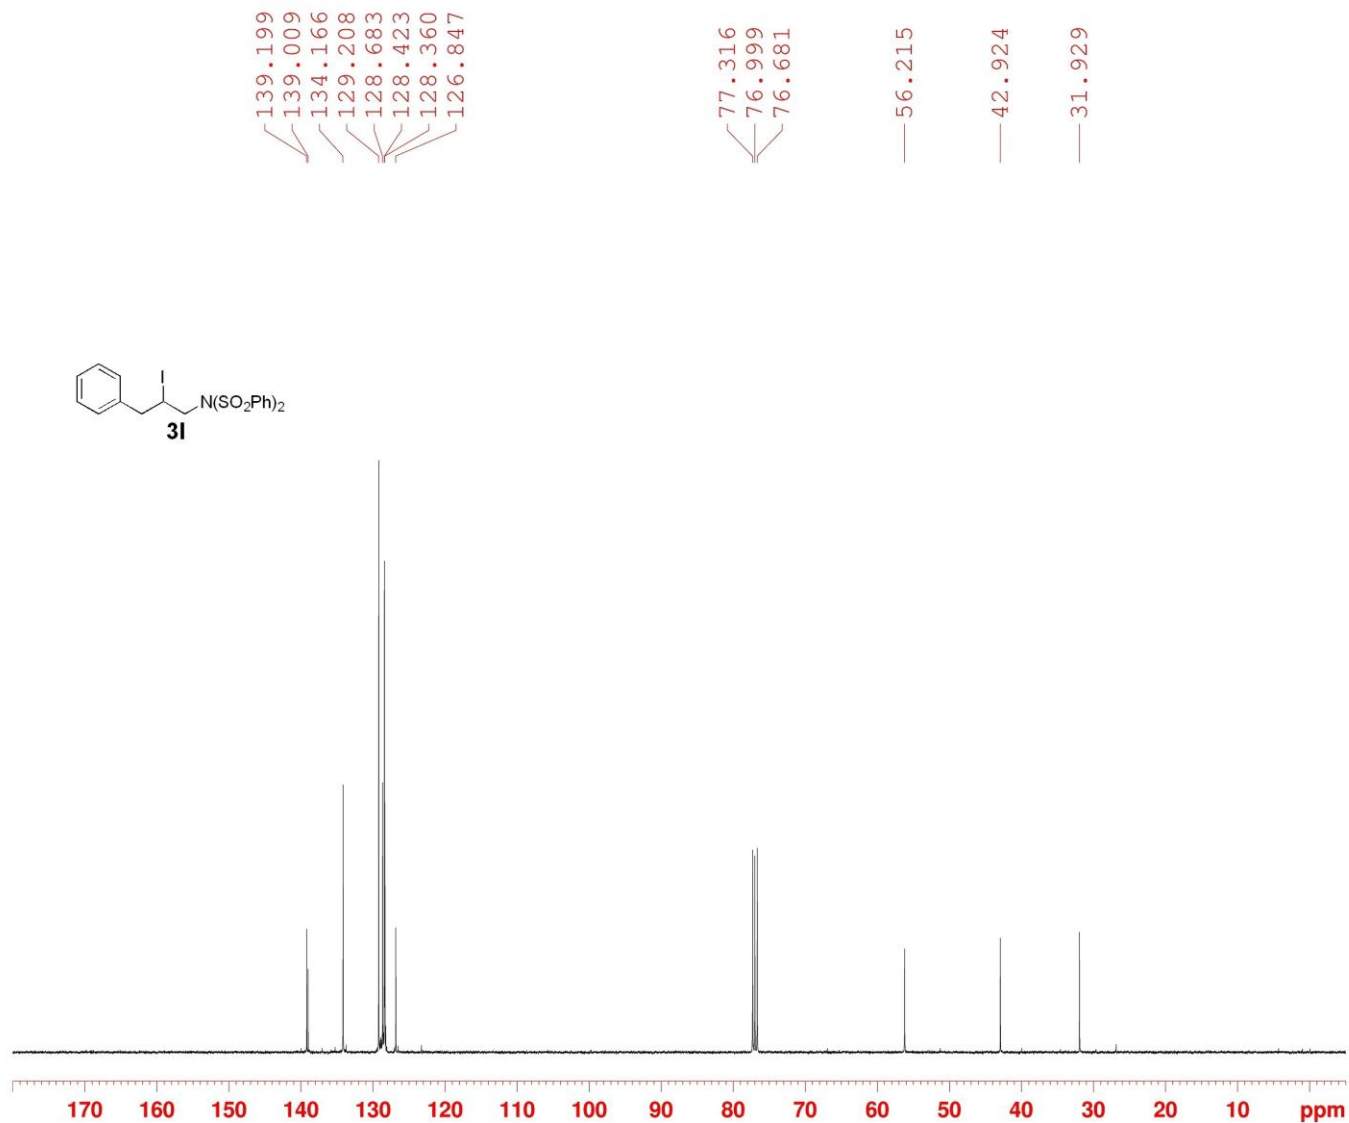

```

NAME      CLJ-WL-L265
EXPNO     2
PROCNO    1
Date_     20180513
Time      1.48
INSTRUM   spect
PROBHD    5 mm PABBO BB/
PULPROG   zgpg30
TD        65536
SOLVENT   CDCl3
NS        512
DS        0
SWH       24038.461 Hz
FIDRES    0.366798 Hz
AQ        1.3631988 sec
RG        194.26
DW        20.800 usec
DE        6.50 usec
TE        300.0 K
D1        2.00000000 sec
D11       0.03000000 sec
TD0       1
  
```

```

===== CHANNEL f1 =====
SFO1     100.6228293 MHz
NUC1     13C
P1       8.54 usec
SI       32768
SF       100.6127773 MHz
WDW      EM
SSB      0
LB       1.00 Hz
GB       0
PC       1.40
  
```

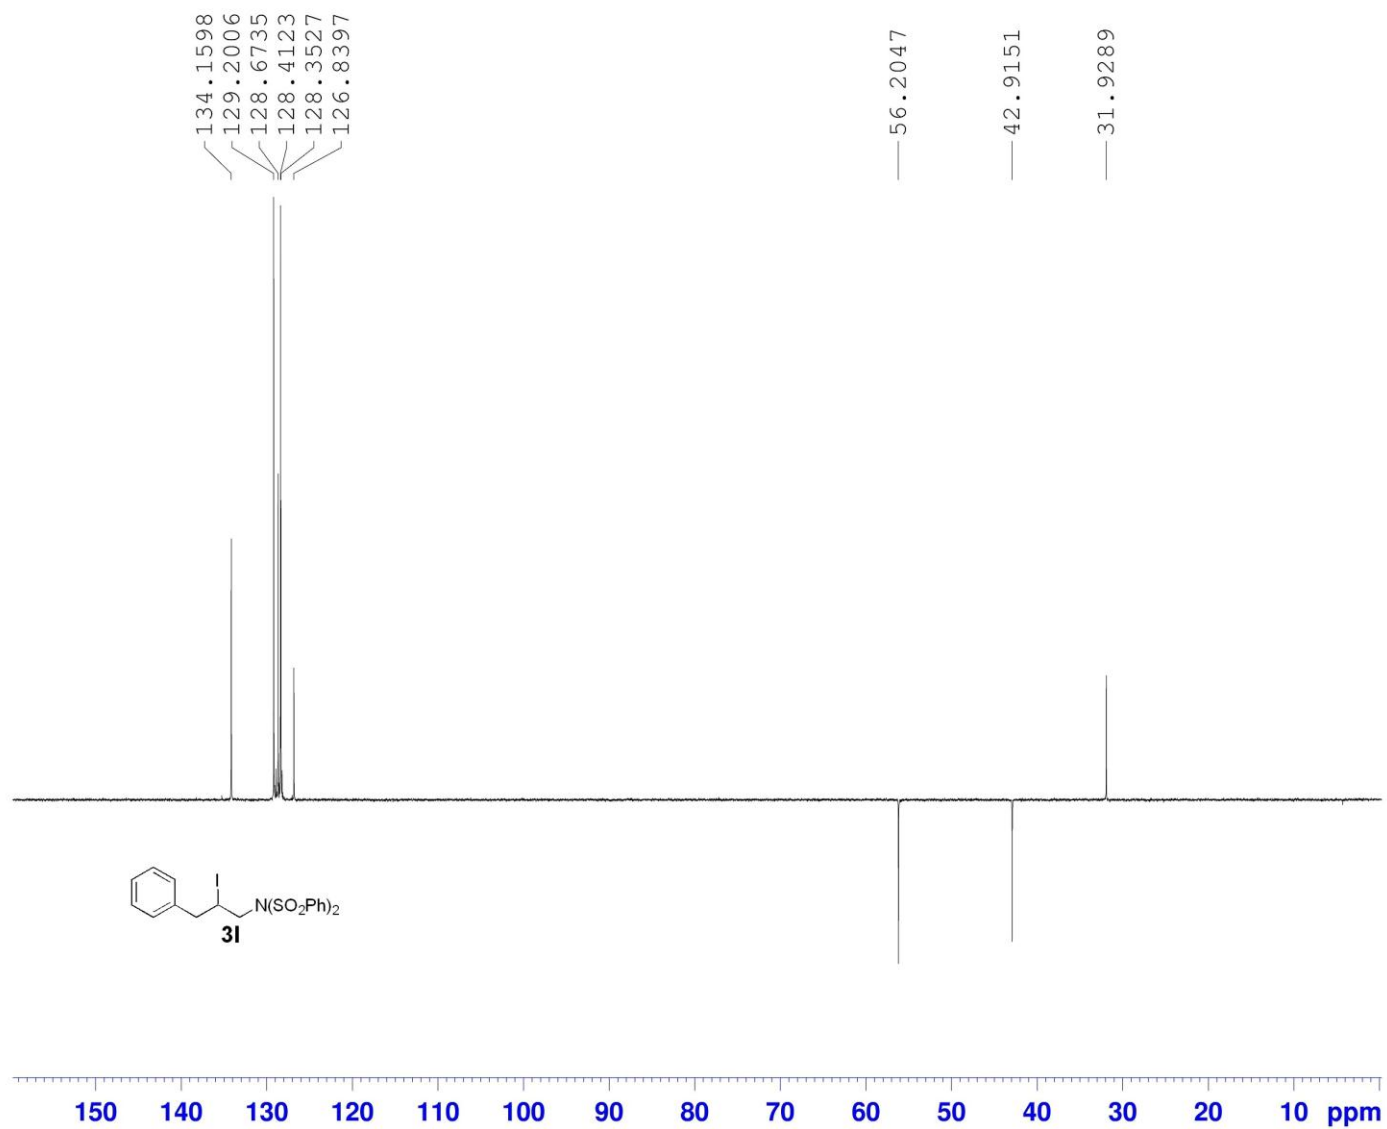

```

NAME      CLJ-WL-L268
EXPNO     1
PROCNO    1
Date_     20180516
Time      9.14
INSTRUM   spect
PROBHD    5 mm PABBO BB/
PULPROG   deptsp135
TD        65536
SOLVENT   CDCl3
NS        256
DS        4
SWH       16129.032 Hz
FIDRES    0.246110 Hz
AQ        2.0316660 sec
RG        194.26
DW        31.000 usec
DE        6.50 usec
TE        300.0 K
CNST2     145.0000000
D1        2.00000000 sec
D2        0.00344828 sec
D12       0.00002000 sec
TD0       1
  
```

```

===== CHANNEL f1 =====
SFO1     100.6208171 MHz
NUC1      13C
P1        8.54 usec
P13       2000.00 usec
SI        32768
SF        100.6127786 MHz
WDW       EM
SSB       0
LB        1.00 Hz
GB        0
PC        1.40
  
```



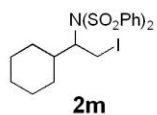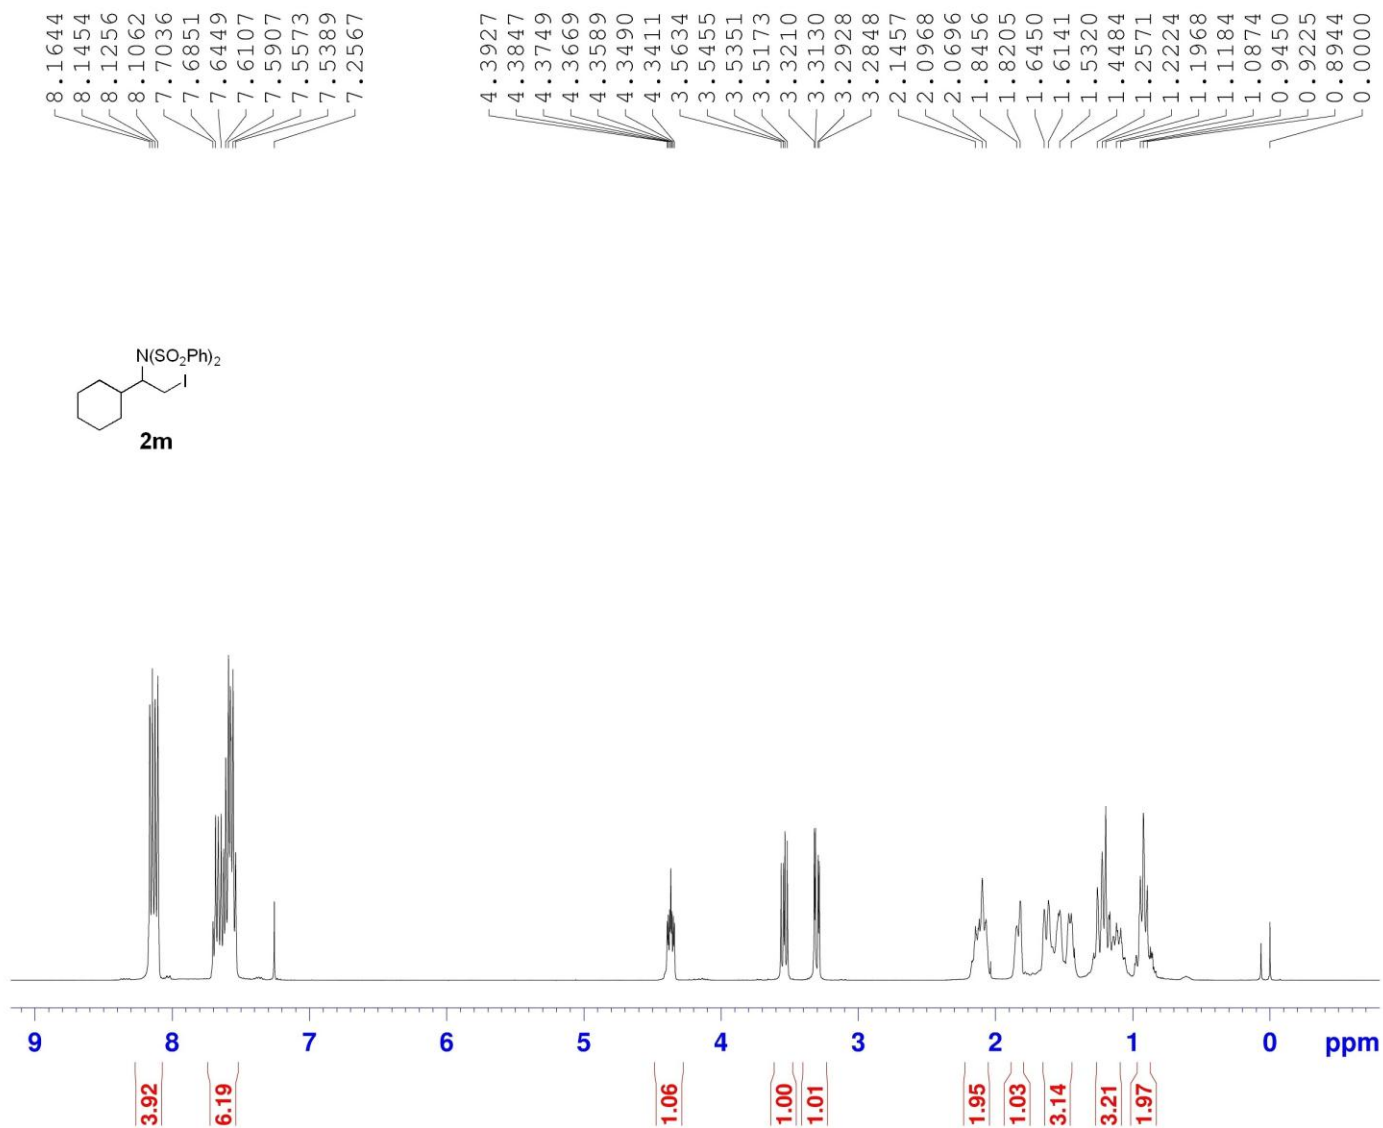

NAME CLJ-WL-L258  
 EXPNO 1  
 PROCNO 1  
 Date\_ 20180512  
 Time 6.23  
 INSTRUM spect  
 PROBHD 5 mm PABBO BB/  
 PULPROG zg30  
 TD 65536  
 SOLVENT CDCl3  
 NS 12  
 DS 0  
 SWH 8012.820 Hz  
 FIDRES 0.122266 Hz  
 AQ 4.0894966 sec  
 RG 23.9  
 DW 62.400 usec  
 DE 6.50 usec  
 TE 300.0 K  
 D1 1.00000000 sec  
 TD0 1

===== CHANNEL f1 =====  
 SF01 400.1324710 MHz  
 NUC1 1H  
 P1 8.04 usec  
 S1 65536  
 SF 400.1300111 MHz  
 WDW EM  
 SSB 0  
 LB 0.30 Hz  
 GB 0  
 PC 1.00

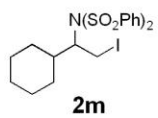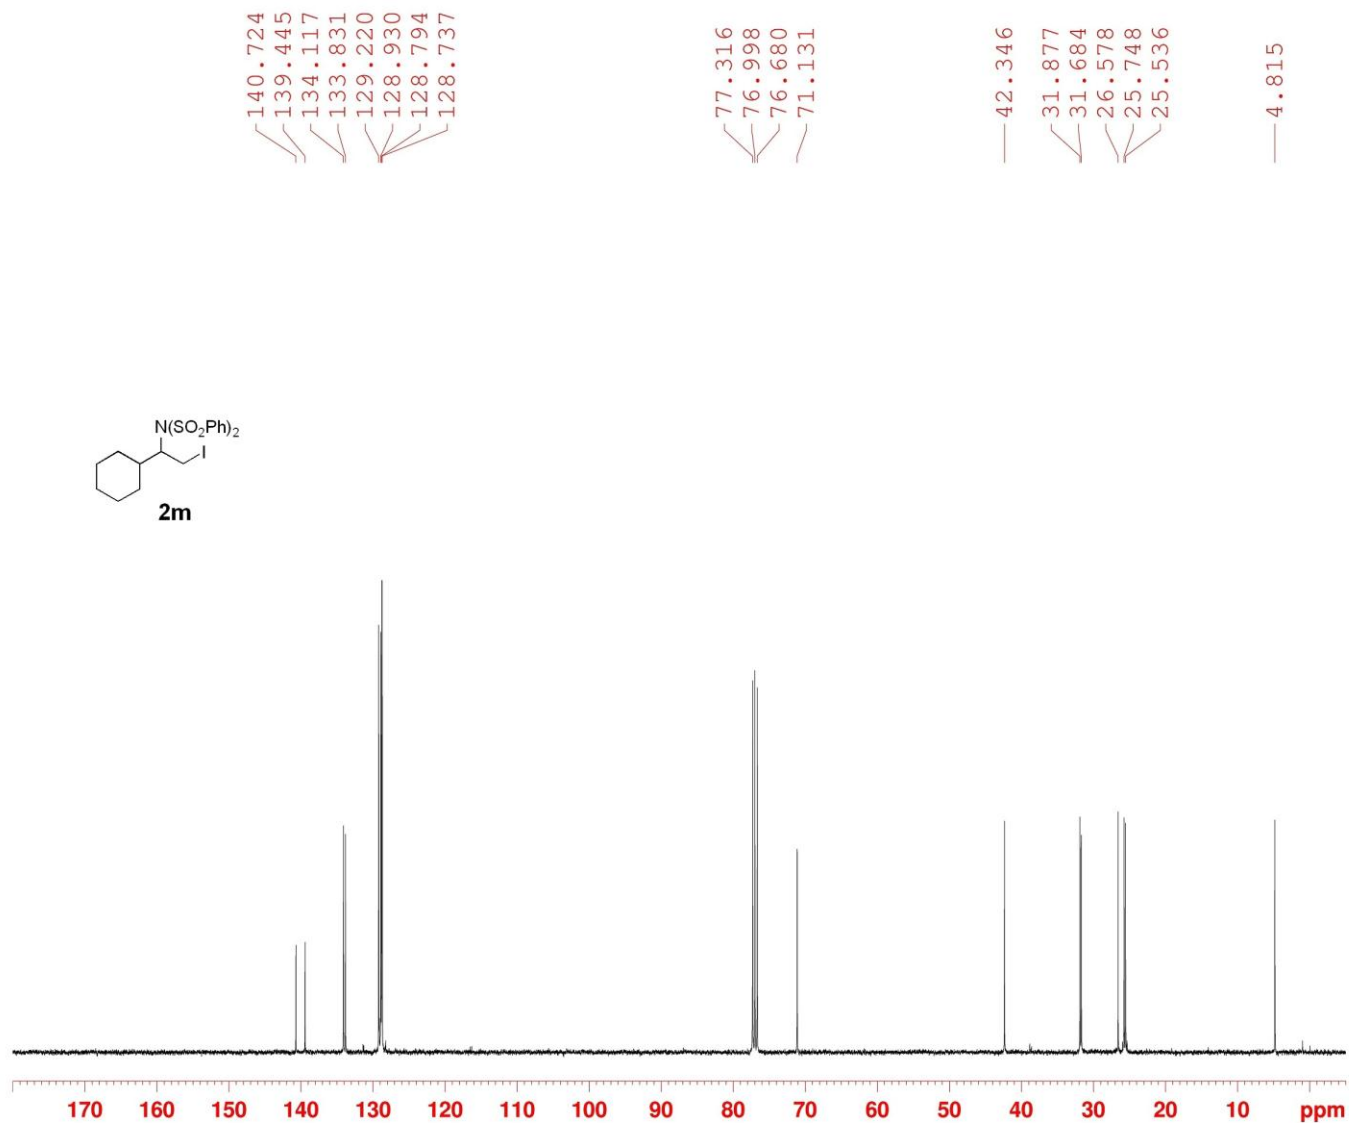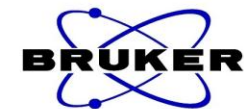

NAME CLJ-WL-L258  
 EXPNO 2  
 PROCNO 1  
 Date\_ 20180512  
 Time 6.53  
 INSTRUM spect  
 PROBHD 5 mm PABBO BB/  
 PULPROG zgpg30  
 TD 65536  
 SOLVENT CDCl3  
 NS 512  
 DS 0  
 SWH 24038.461 Hz  
 FIDRES 0.366798 Hz  
 AQ 1.3631988 sec  
 RG 194.26  
 DW 20.800 usec  
 DE 6.50 usec  
 TE 300.0 K  
 D1 2.00000000 sec  
 D11 0.03000000 sec  
 TD0 1

===== CHANNEL f1 =====  
 SFO1 100.6228293 MHz  
 NUC1 13C  
 P1 8.54 usec  
 SI 32768  
 SF 100.6127757 MHz  
 WDW EM  
 SSB 0  
 LB 1.00 Hz  
 GB 0  
 PC 1.40

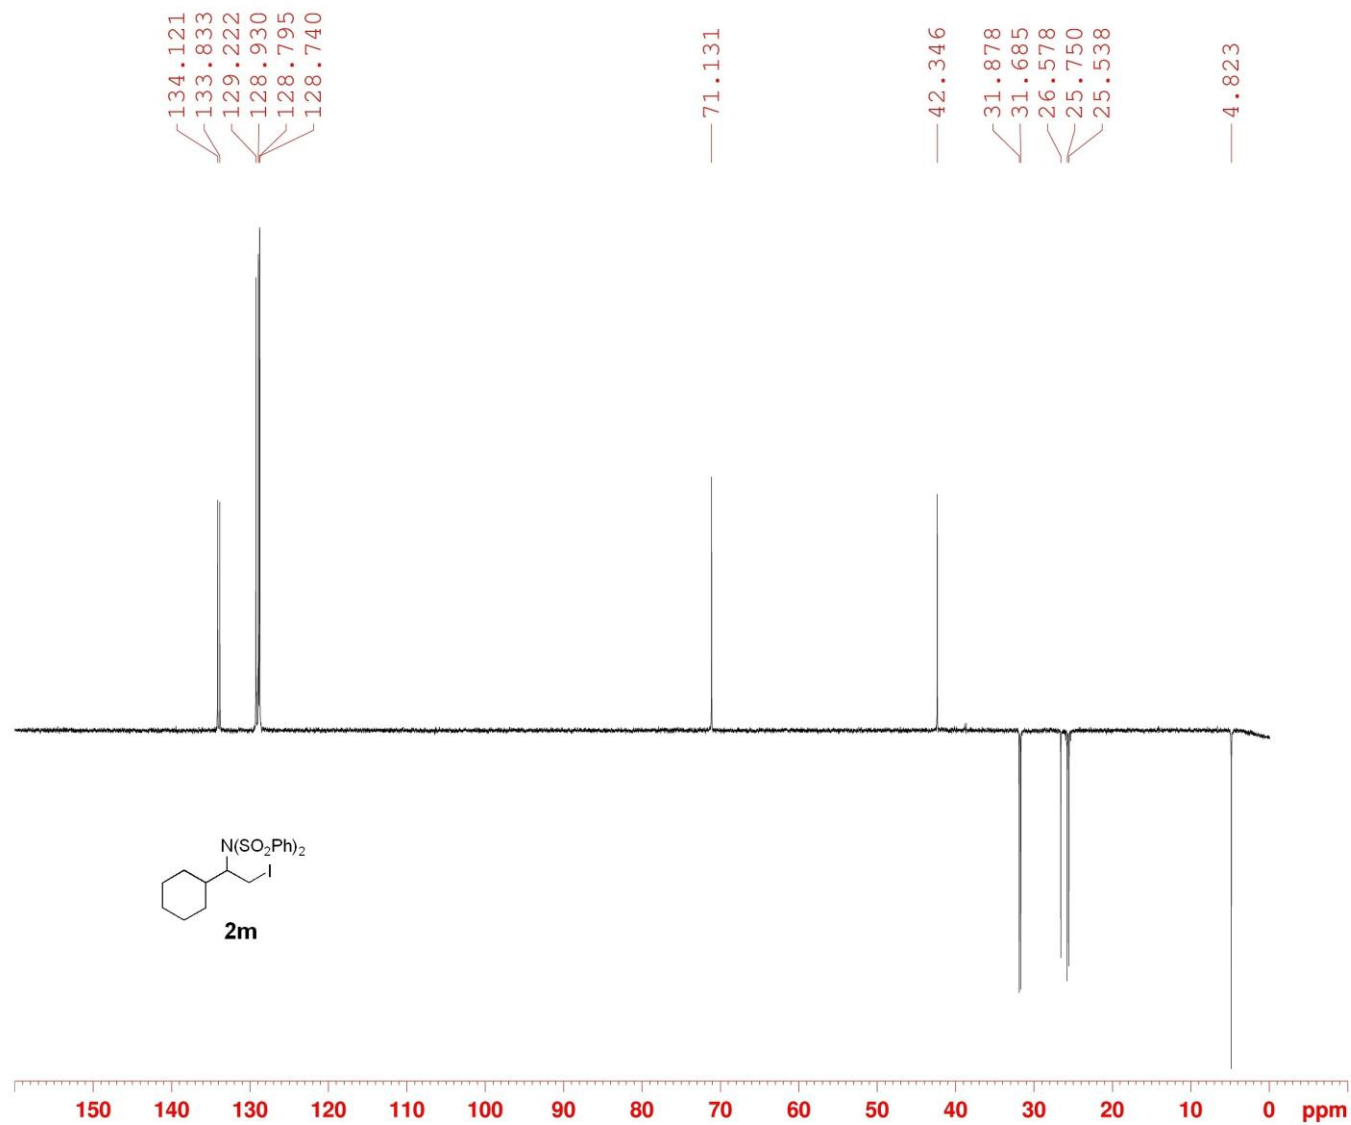

```

NAME      CLJ-WL-L266
EXPNO     1
PROCNO    1
Date_     20180515
Time      7.32
INSTRUM   spect
PROBHD    5 mm PABBO BB/
PULPROG   deptsp135
TD        65536
SOLVENT   CDCl3
NS        256
DS        4
SWH       16129.032 Hz
FIDRES    0.246110 Hz
AQ        2.0316660 sec
RG        194.26
DW        31.000 usec
DE        6.50 usec
TE        300.0 K
CNST2     145.0000000
D1        2.00000000 sec
D2        0.00344828 sec
D12       0.00002000 sec
TD0       1

```

```

===== CHANNEL f1 =====
SFO1    100.6208171 MHz
NUC1     13C
P1       8.54 usec
P13     2000.00 usec
SI       32768
SF     100.6127758 MHz
WDW      EM
SSB      0
LB       1.00 Hz
GB       0
PC       1.40

```

8.0394  
8.0206  
8.0173  
7.6840  
7.6654  
7.6467  
7.5815  
7.5614  
7.5427  
7.2558

4.4381  
4.4337  
4.4248  
4.4199  
4.4137  
4.4090  
4.4001  
4.3957  
4.2399  
4.2151  
4.2027  
4.1780  
4.1507  
4.1371  
4.1136  
4.1000  
1.8617  
1.8363  
1.8308  
1.7555  
1.7225  
1.6767  
1.6686  
1.6318  
1.6017  
1.2869  
1.2561  
1.1820  
1.1598  
1.1368  
1.0535  
1.0186  
0.6142  
0.6006  
0.5942  
0.5757  
-0.0002

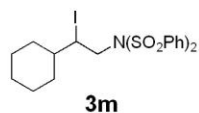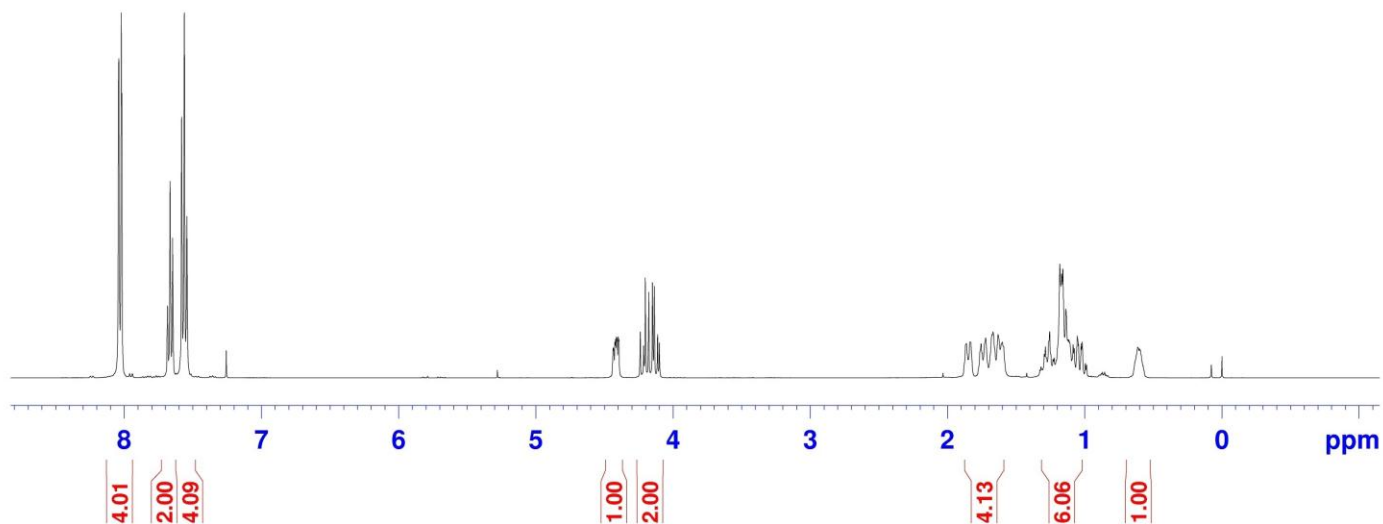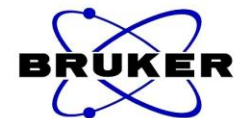

NAME CLJ-WL-L259  
EXPNO 1  
PROCNO 1  
Date\_ 20180512  
Time 6.57  
INSTRUM spect  
PROBHD 5 mm PABBO BB/  
PULPROG zg30  
TD 65536  
SOLVENT CDCl3  
NS 12  
DS 0  
SWH 8012.820 Hz  
FIDRES 0.122266 Hz  
AQ 4.0894966 sec  
RG 18.6  
DW 62.400 usec  
DE 6.50 usec  
TE 300.0 K  
D1 1.00000000 sec  
TD0 1

===== CHANNEL f1 =====  
SF01 400.1324710 MHz  
NUC1 1H  
P1 8.04 usec  
S1 65536  
SF 400.1300114 MHz  
WDW EM  
SSB 0  
LB 0.30 Hz  
GB 0  
PC 1.00

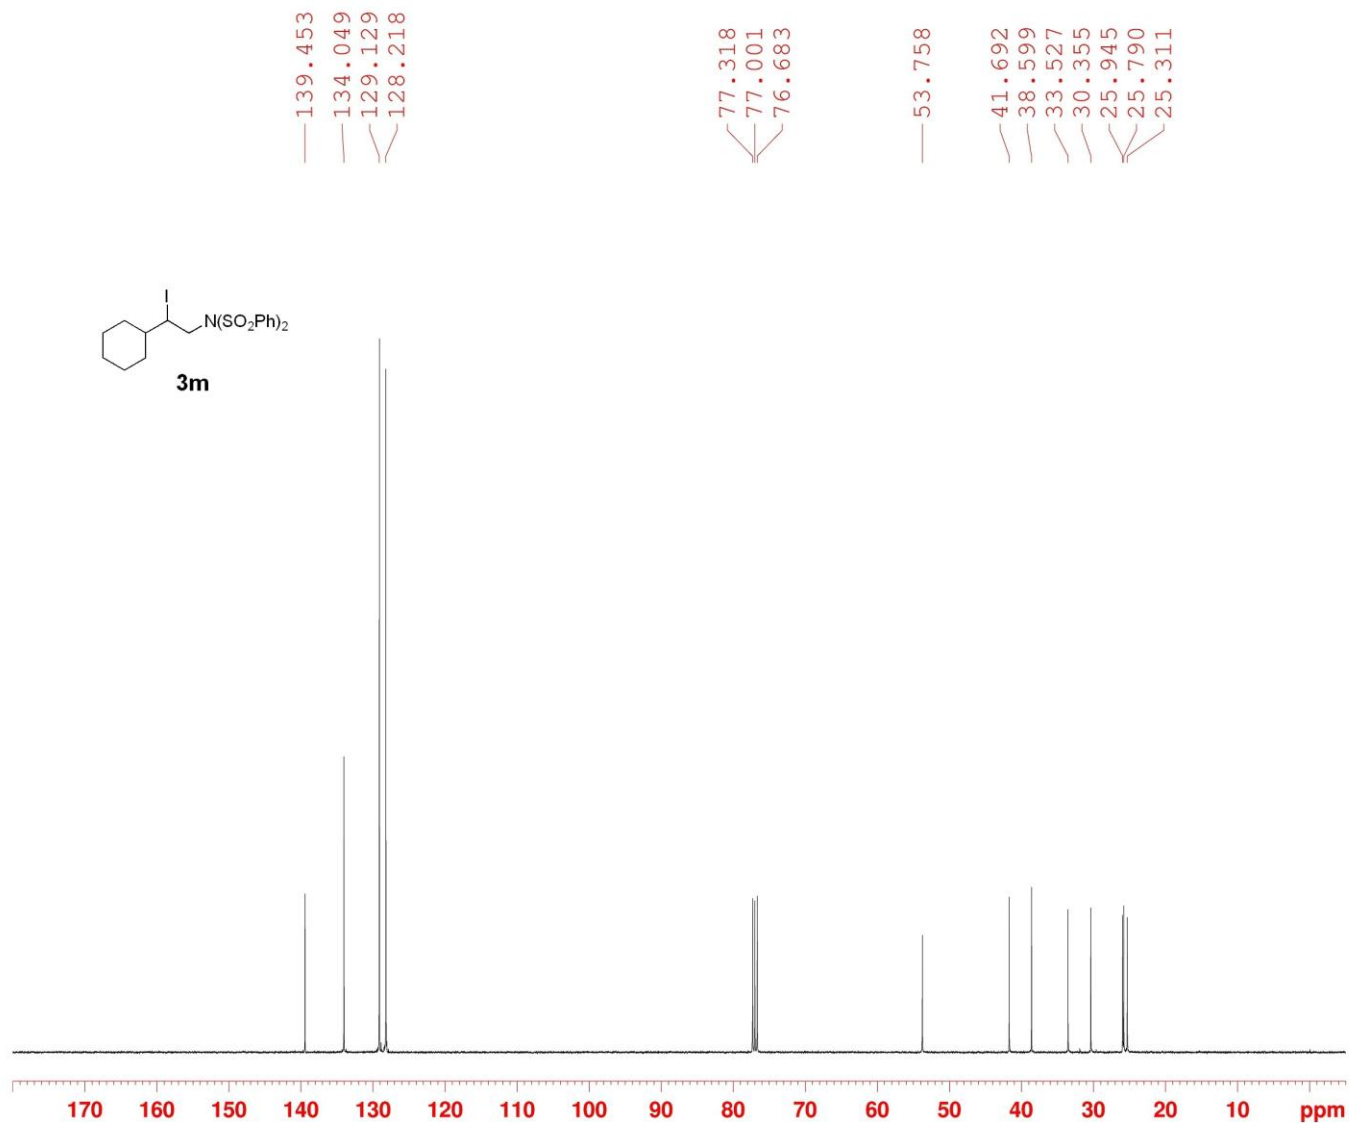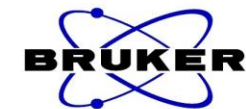

```

NAME      CLJ-WL-L259
EXPNO     2
PROCNO    1
Date_     20180512
Time      7.28
INSTRUM   spect
PROBHD    5 mm PABBO BB/
PULPROG   zgpg30
TD        65536
SOLVENT   CDCl3
NS        512
DS        0
SWH       24038.461 Hz
FIDRES    0.366798 Hz
AQ        1.3631988 sec
RG        194.26
DW        20.800 usec
DE        6.50 usec
TE        300.0 K
D1        2.00000000 sec
D11       0.03000000 sec
TD0       1
  
```

```

===== CHANNEL f1 =====
SFO1     100.6228293 MHz
NUC1      13C
P1       8.54 usec
SI       32768
SF       100.6127779 MHz
WDW      EM
SSB      0
LB       1.00 Hz
GB       0
PC       1.40
  
```

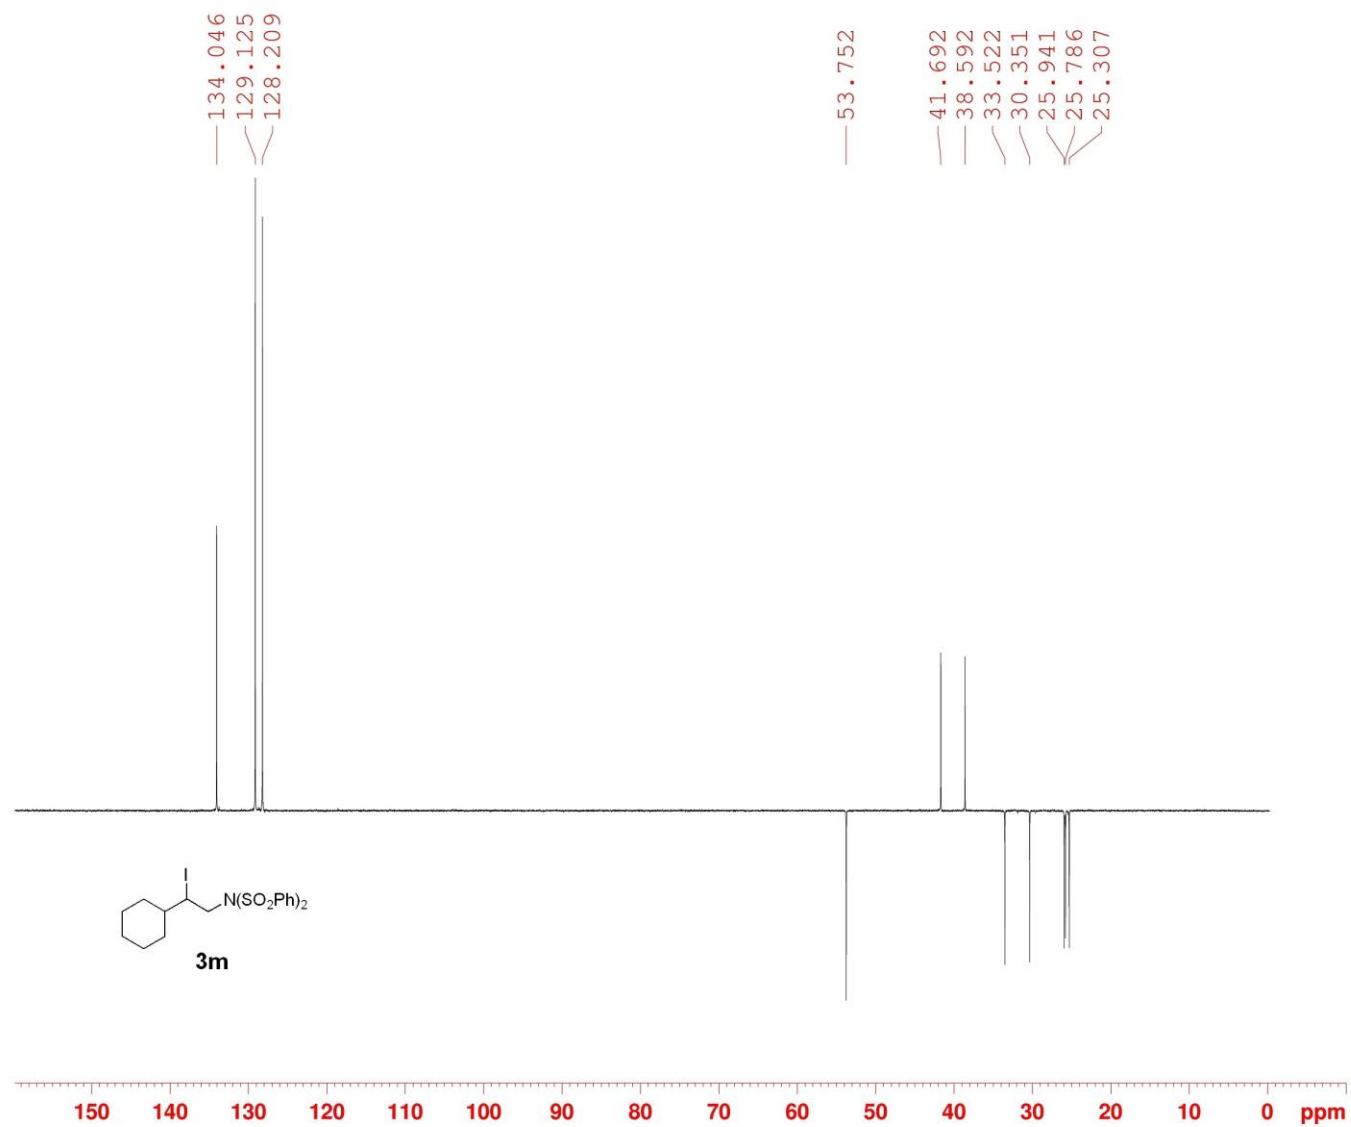

```

NAME      CLJ-WL-L267
EXPNO     1
PROCNO    1
Date_     20180515
Time      7.53
INSTRUM   spect
PROBHD    5 mm PABBO BB/
PULPROG   deptsp135
TD        65536
SOLVENT   CDC13
NS        256
DS        4
SWH       16129.032 Hz
FIDRES    0.246110 Hz
AQ        2.0316660 sec
RG        194.26
DW        31.000 usec
DE        6.50 usec
TE        300.0 K
CNST2     145.0000000
D1        2.00000000 sec
D2        0.00344828 sec
D12       0.00002000 sec
TD0       1
  
```

```

===== CHANNEL f1 =====
SFO1     100.6208171 MHz
NUC1     13C
P1       8.54 usec
P13      2000.00 usec
SI       32768
SF       100.6127787 MHz
WDW      EM
SSB      0
LB       1.00 Hz
GB       0
PC       1.40
  
```

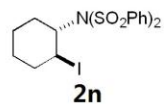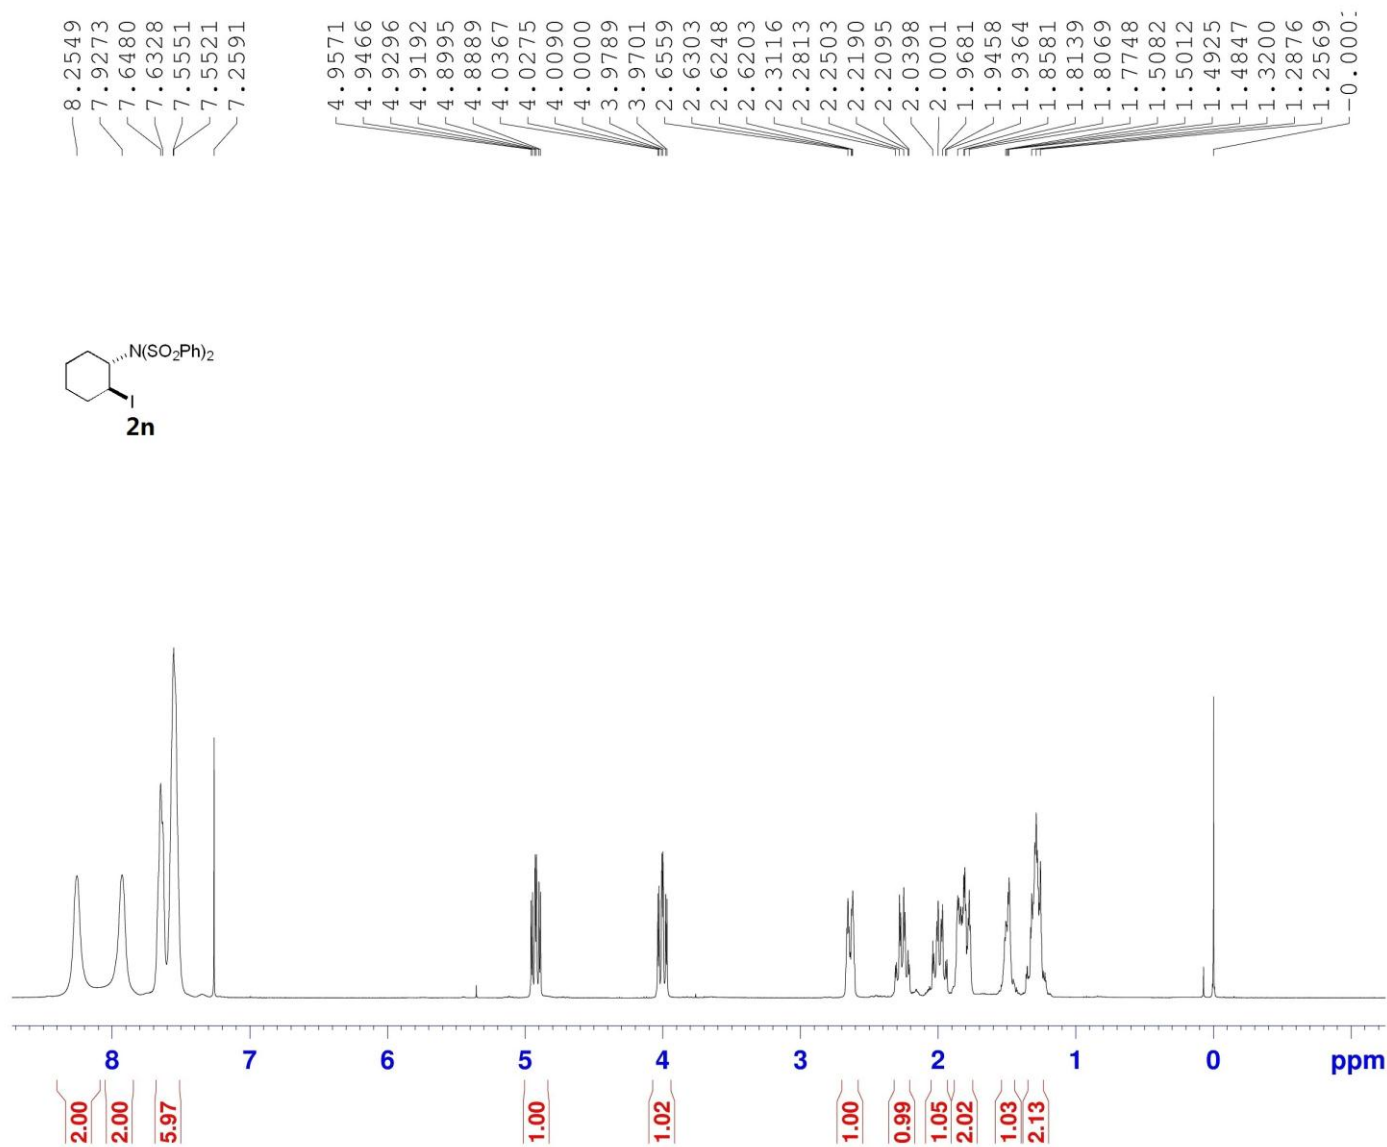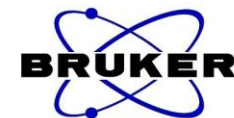

```

NAME      CLJ-WL-L219
EXPNO     1
PROCNO    1
Date_     20180410
Time      6.56
INSTRUM   spect
PROBHD    5 mm PABBO BB/
PULPROG   zg30
TD        65536
SOLVENT   CDCl3
NS         12
DS         0
SWH        8012.820 Hz
FIDRES     0.122266 Hz
AQ         4.0894966 sec
RG         57.79
DW         62.400 usec
DE         6.50 usec
TE         300.0 K
D1         1.00000000 sec
TD0        1
  
```

```

===== CHANNEL f1 =====
SFO1      400.1324710 MHz
NUC1       1H
P1         8.04 usec
SI         65536
SF         400.1300101 MHz
WDW        EM
SSB        0
LB         0.30 Hz
GB         0
PC         1.00
  
```

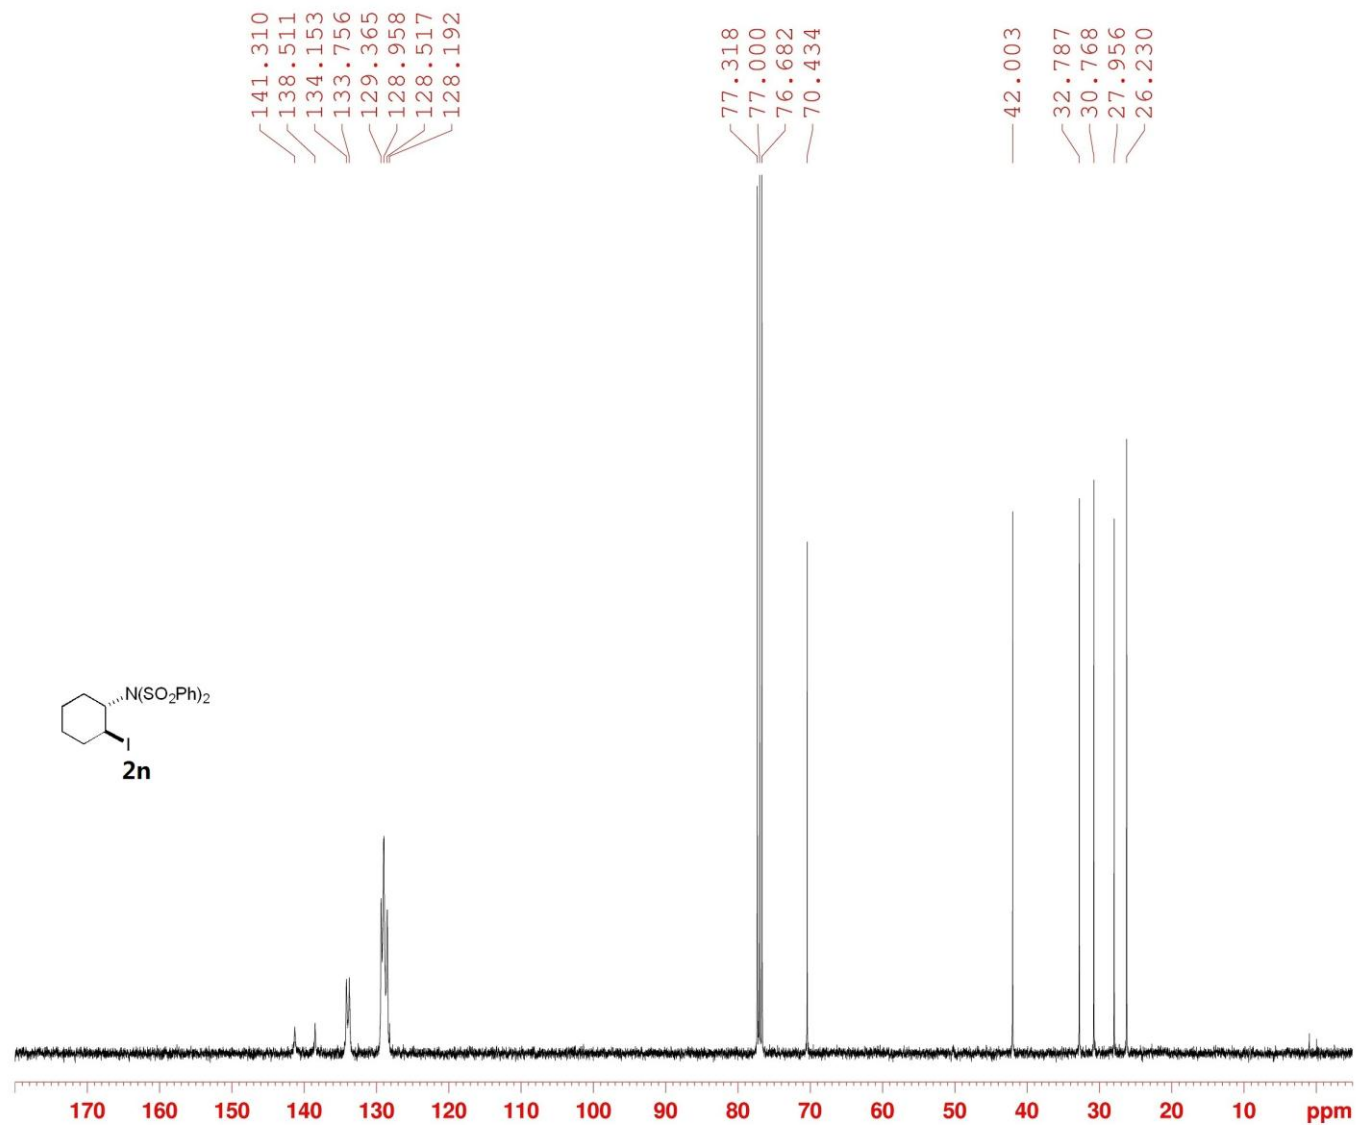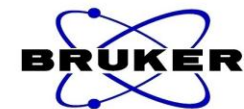

```

NAME      CLJ-WL-L253
EXPNO     2
PROCNO    1
Date_     20180509
Time      7.08
INSTRUM   spect
PROBHD    5 mm PABBO BB/
PULPROG   zgpg30
TD        65536
SOLVENT   CDCl3
NS        512
DS        0
SWH       24038.461 Hz
FIDRES    0.366798 Hz
AQ        1.3631988 sec
RG        194.26
DW        20.800 usec
DE        6.50 usec
TE        300.0 K
D1        2.00000000 sec
D11       0.03000000 sec
TD0       1
  
```

```

===== CHANNEL f1 =====
SFO1    100.6228293 MHz
NUC1     13C
P1       8.54 usec
SI      32768
SF      100.6127761 MHz
WDW      EM
SSB      0
LB       1.00 Hz
GB       0
PC       1.40
  
```



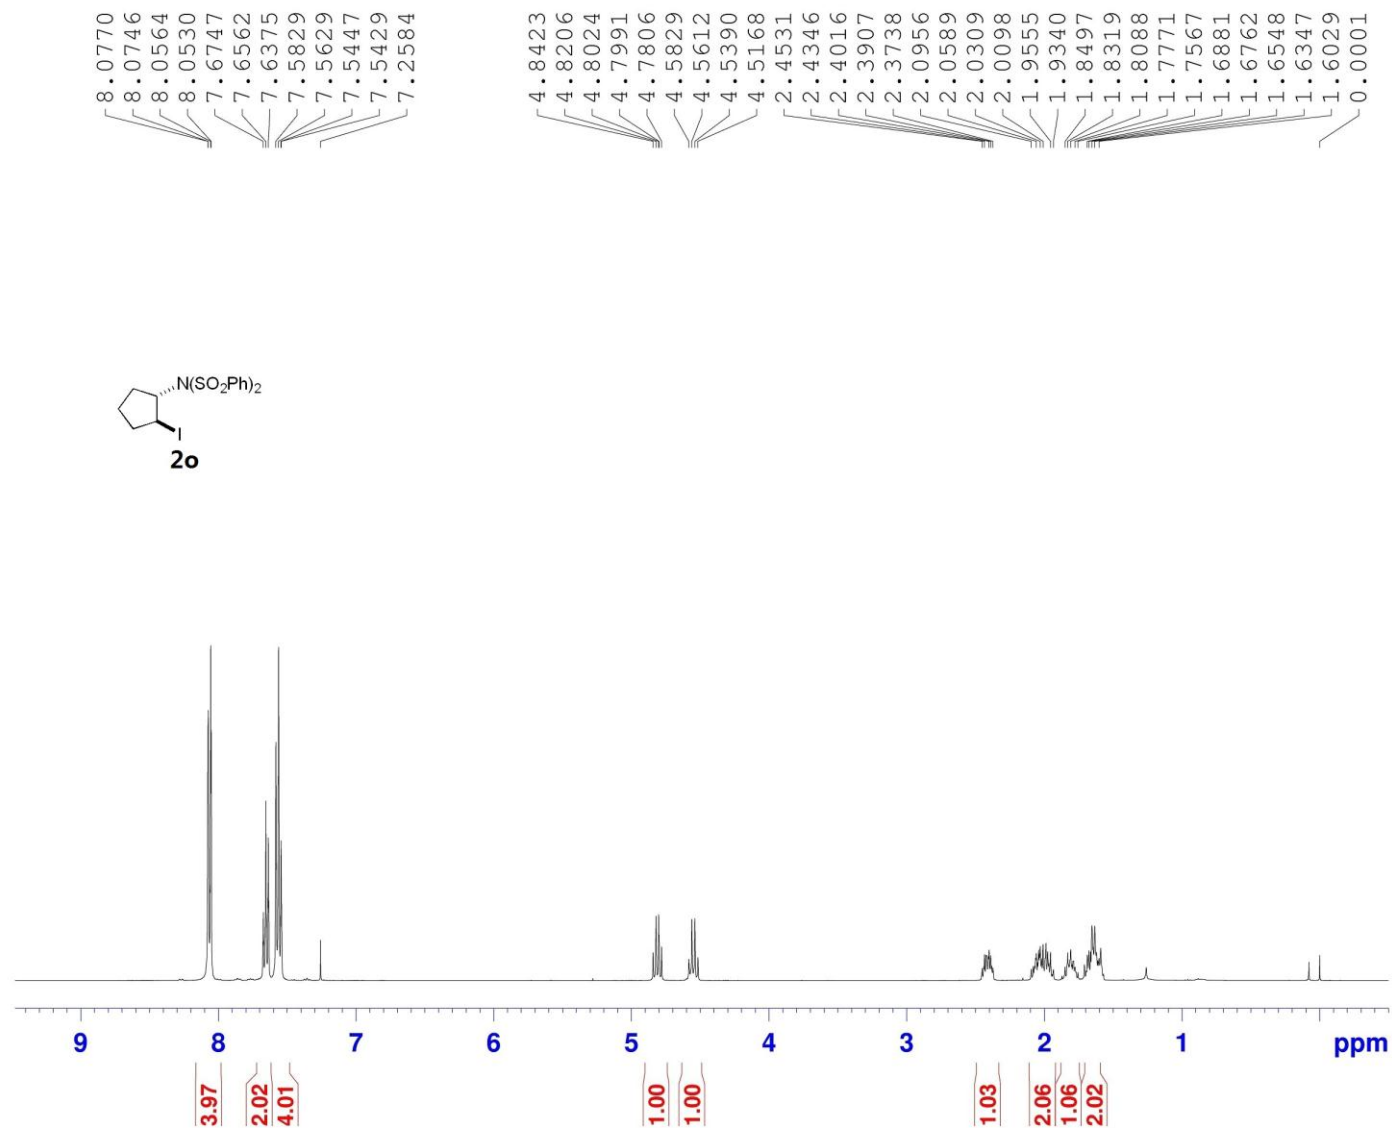

```

NAME      CLJ-WL-L250
EXPNO     1
PROCNO    1
Date_     20180505
Time      22.43
INSTRUM   spect
PROBHD    5 mm PABBO BB/
PULPROG   zg30
TD        65536
SOLVENT   CDCl3
NS        12
DS        0
SWH       8012.820 Hz
FIDRES    0.122266 Hz
AQ        4.0894966 sec
RG        41.07
DW        62.400 usec
DE        6.50 usec
TE        300.0 K
D1        1.00000000 sec
TD0       1
  
```

```

===== CHANNEL f1 =====
SFO1     400.1324710 MHz
NUC1      1H
P1       8.04 usec
SI       65536
SF       400.1300105 MHz
WDW      EM
SSB      0
LB       0.30 Hz
GB       0
PC       1.00
  
```

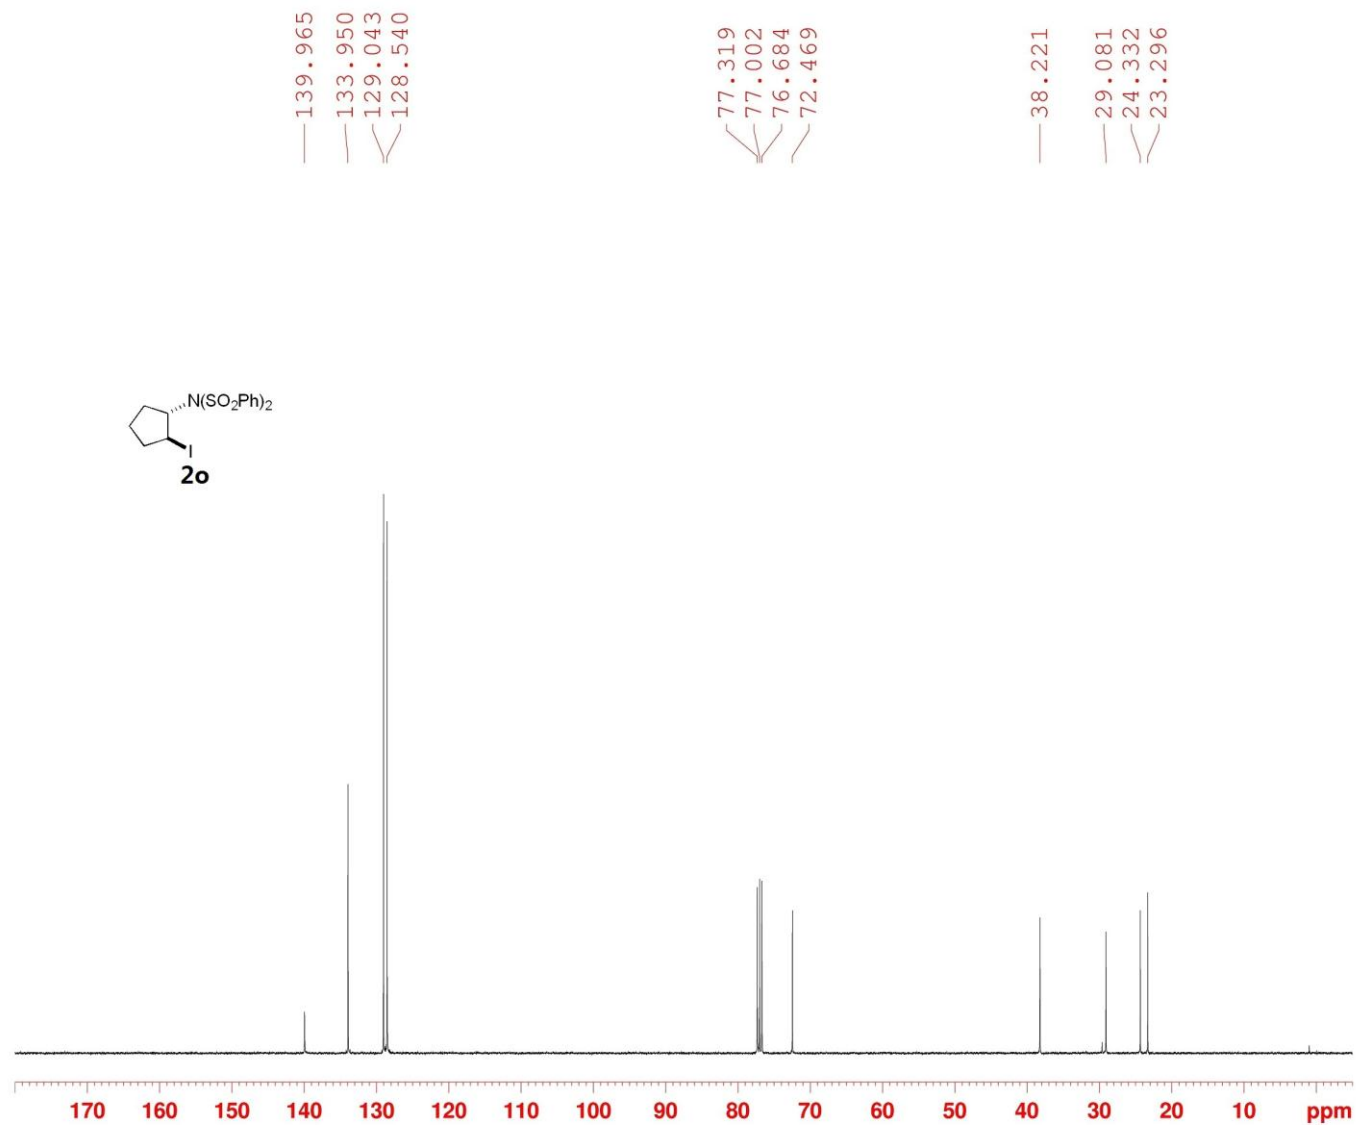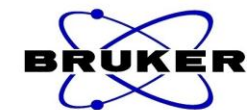

NAME CLJ-WL-L250  
 EXPNO 2  
 PROCNO 1  
 Date\_ 20180505  
 Time 23.13  
 INSTRUM spect  
 PROBHD 5 mm PABBO BB/  
 PULPROG zgpg30  
 TD 65536  
 SOLVENT CDCl3  
 NS 512  
 DS 0  
 SWH 24038.461 Hz  
 FIDRES 0.366798 Hz  
 AQ 1.3631988 sec  
 RG 194.26  
 DW 20.800 usec  
 DE 6.50 usec  
 TE 300.0 K  
 D1 2.00000000 sec  
 D11 0.03000000 sec  
 TD0 1

===== CHANNEL f1 =====  
 SFO1 100.6228293 MHz  
 NUC1 13C  
 P1 8.54 usec  
 SI 32768  
 SF 100.6127765 MHz  
 WDW EM  
 SSB 0  
 LB 1.00 Hz  
 GB 0  
 PC 1.40

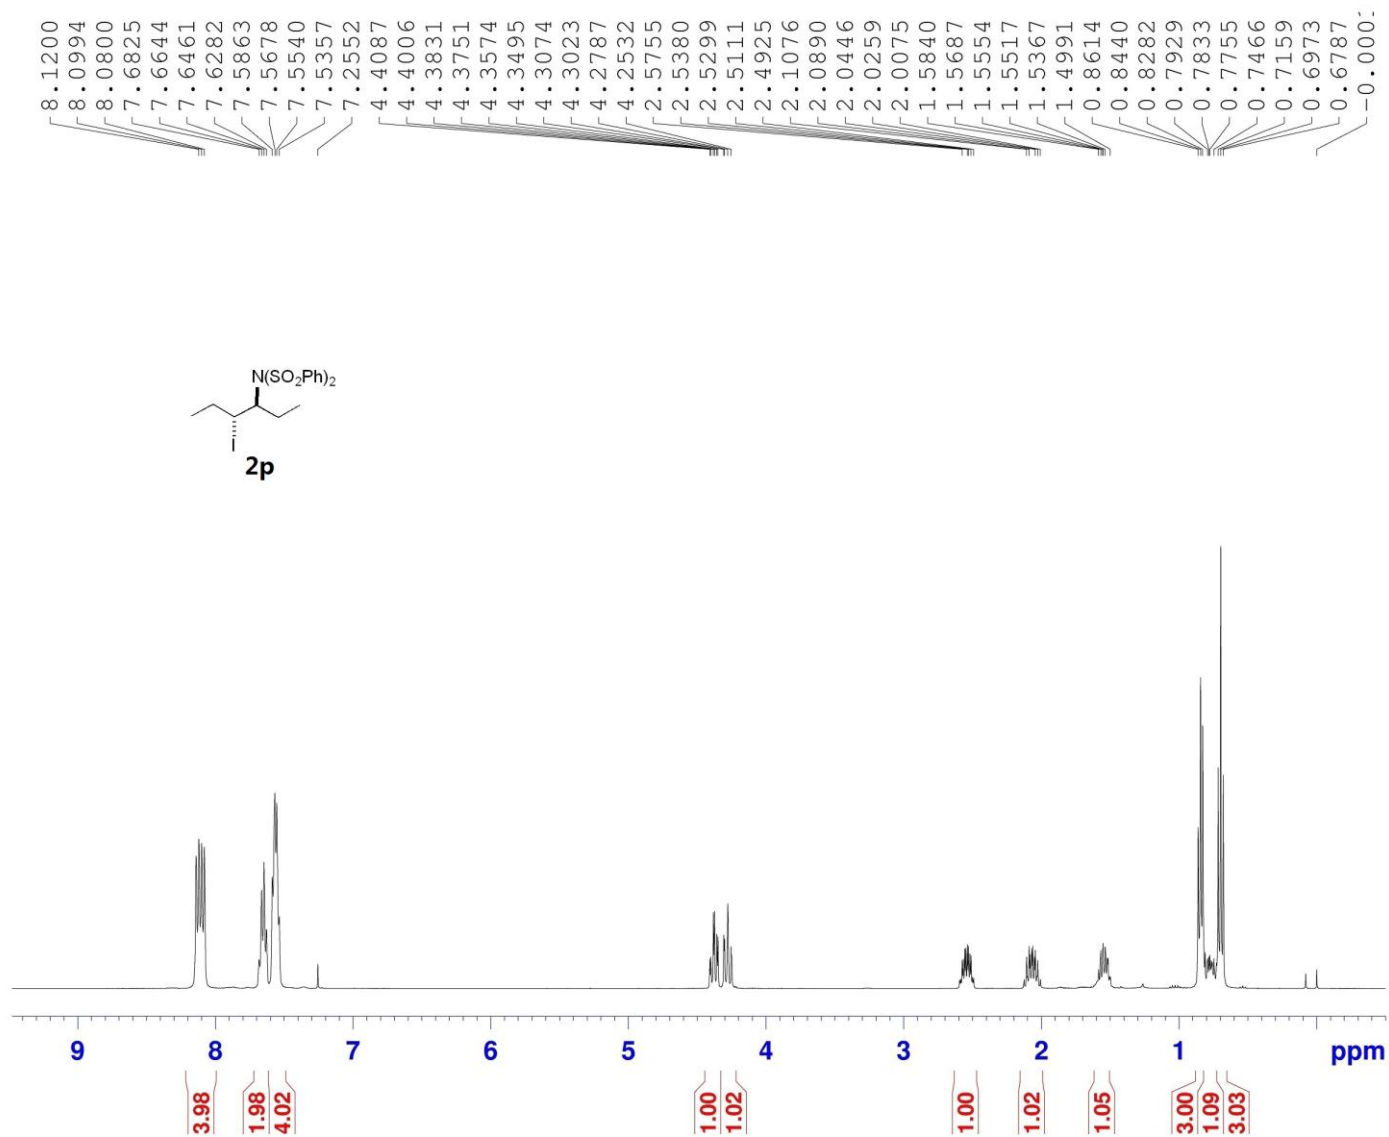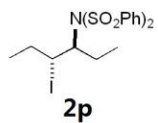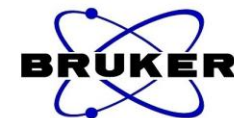

NAME CLJ-WL-L246  
 EXPNO 1  
 PROCNO 1  
 Date\_ 20180429  
 Time 11.18  
 INSTRUM spect  
 PROBHD 5 mm PABBO BB/  
 PULPROG zg30  
 TD 65536  
 SOLVENT CDC13  
 NS 12  
 DS 0  
 SWH 8012.820 Hz  
 FIDRES 0.122266 Hz  
 AQ 4.0894966 sec  
 RG 16.03  
 DW 62.400 usec  
 DE 6.50 usec  
 TE 299.9 K  
 D1 1.00000000 sec  
 TD0 1

===== CHANNEL f1 =====  
 SFO1 400.1324710 MHz  
 NUC1 1H  
 P1 8.04 usec  
 SI 65536  
 SF 400.1300117 MHz  
 WDW EM  
 SSB 0  
 LB 0.30 Hz  
 GB 0  
 PC 1.00

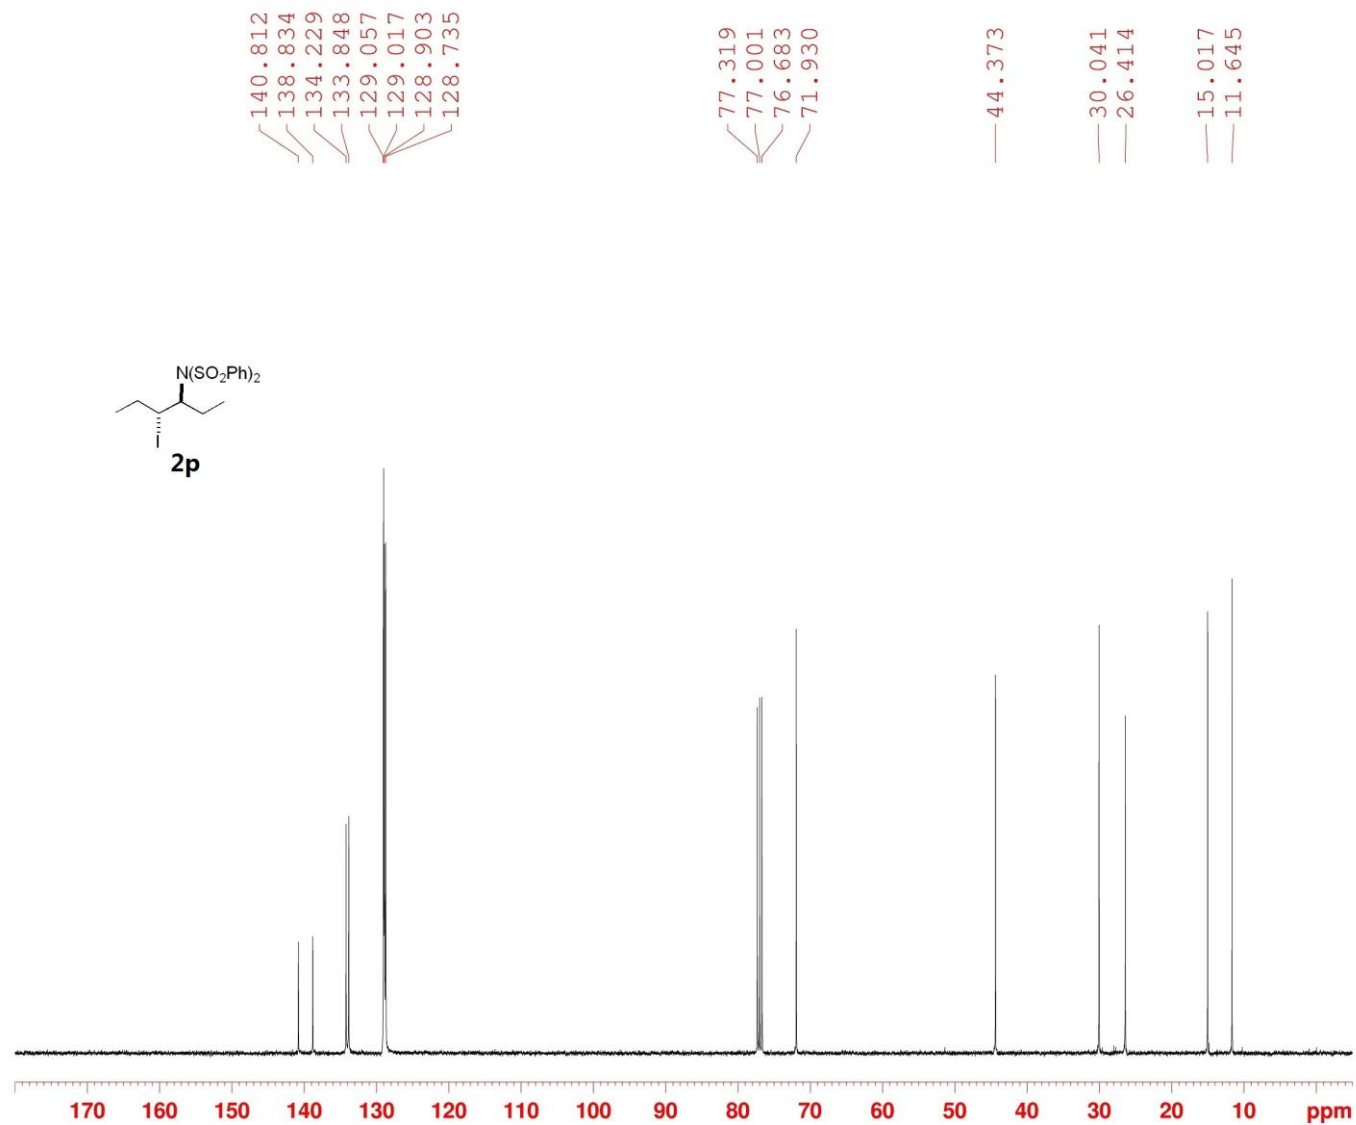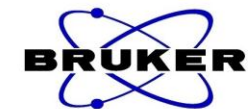

```

NAME      CLJ-WL-L246
EXPNO     2
PROCNO    1
Date_     20180429
Time      11.48
INSTRUM   spect
PROBHD    5 mm PABBO BB/
PULPROG   zgpg30
TD        65536
SOLVENT   CDCl3
NS        512
DS        0
SWH       24038.461 Hz
FIDRES    0.366798 Hz
AQ        1.3631988 sec
RG        194.26
DW        20.800 usec
DE        6.50 usec
TE        300.0 K
D1        2.00000000 sec
D11       0.03000000 sec
TD0       1
  
```

```

===== CHANNEL f1 =====
SFO1    100.6228293 MHz
NUC1     13C
P1       8.54 usec
SI      32768
SF      100.6127787 MHz
WDW      EM
SSB      0
LB       1.00 Hz
GB       0
PC       1.40
  
```

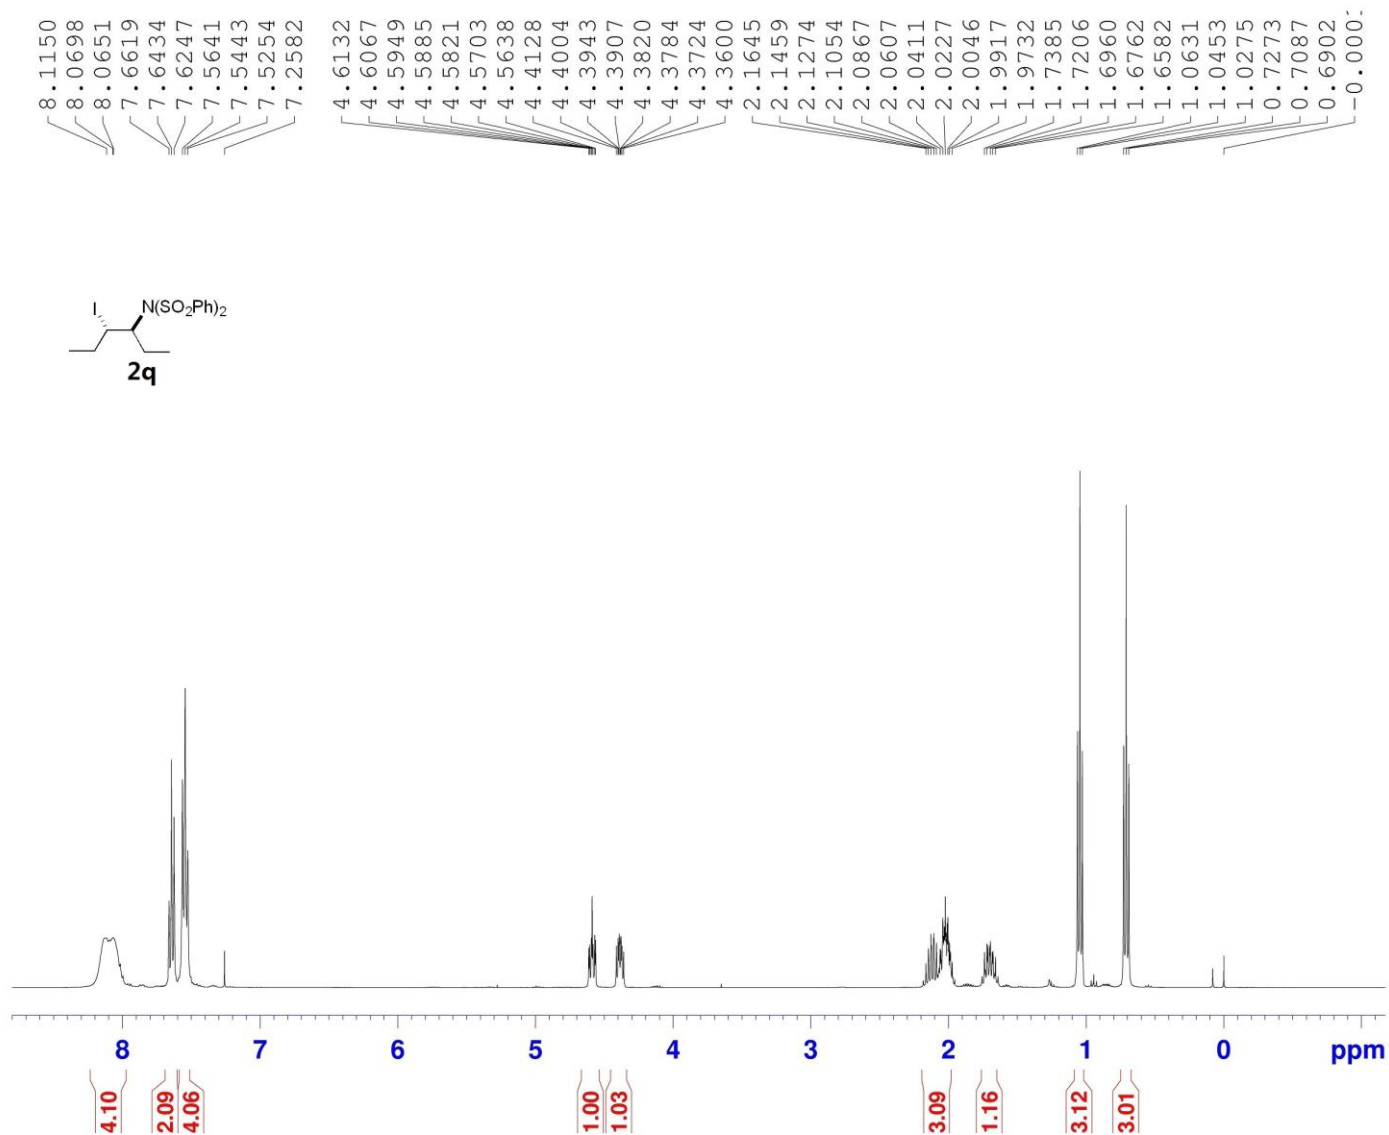

NAME CLJ-WL-L249  
 EXPNO 1  
 PROCNO 1  
 Date\_ 20180505  
 Time 23.17  
 INSTRUM spect  
 PROBHD 5 mm PABBO BB/  
 PULPROG zg30  
 TD 65536  
 SOLVENT CDCl<sub>3</sub>  
 NS 12  
 DS 0  
 SWH 8012.820 Hz  
 FIDRES 0.122266 Hz  
 AQ 4.0894966 sec  
 RG 18.6  
 DW 62.400 usec  
 DE 6.50 usec  
 TE 300.0 K  
 D1 1.00000000 sec  
 TD0 1

===== CHANNEL f1 =====  
 SFO1 400.1324710 MHz  
 NUC1 1H  
 P1 8.04 usec  
 SI 65536  
 SF 400.1300105 MHz  
 WDW EM  
 SSB 0  
 LB 0.30 Hz  
 GB 0  
 PC 1.00

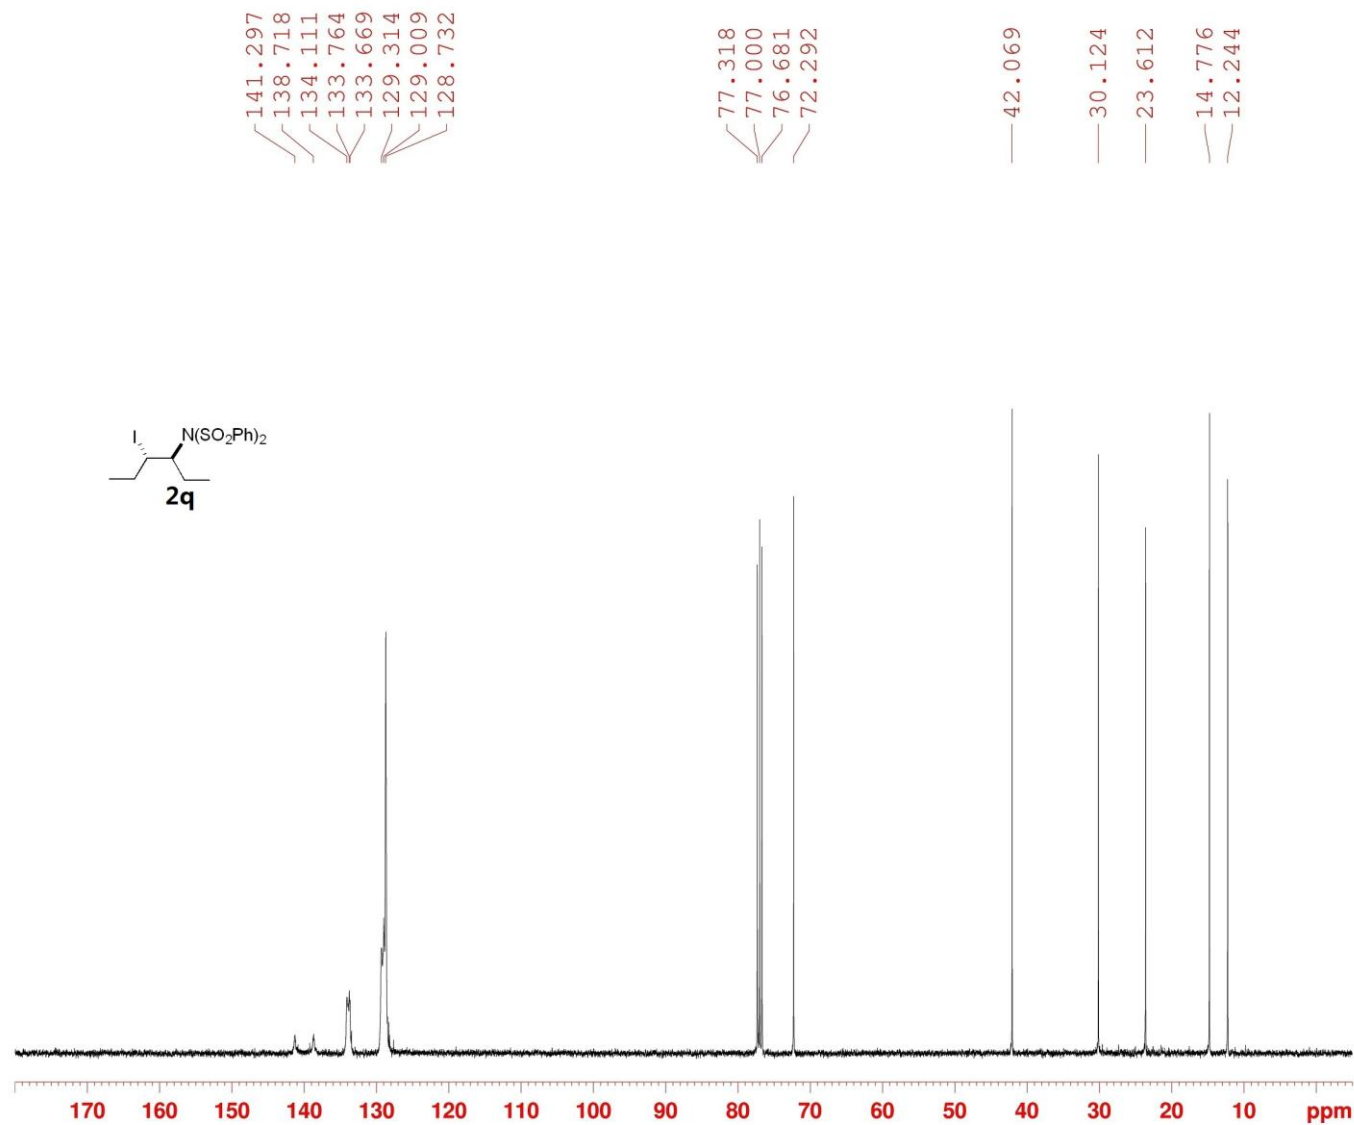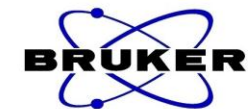

```

NAME      CLJ-WL-L249
EXPNO     2
PROCNO    1
Date_     20180505
Time      23.47
INSTRUM   spect
PROBHD    5 mm PABBO BB/
PULPROG   zgpg30
TD        65536
SOLVENT   CDCl3
NS        512
DS        0
SWH       24038.461 Hz
FIDRES    0.366798 Hz
AQ        1.3631988 sec
RG        194.26
DW        20.800 usec
DE        6.50 usec
TE        300.0 K
D1        2.00000000 sec
D11       0.03000000 sec
TD0       1
  
```

```

===== CHANNEL f1 =====
SFO1      100.6228293 MHz
NUC1      13C
P1        8.54 usec
SI        32768
SF        100.6127797 MHz
WDW       EM
SSB       0
LB        1.00 Hz
GB        0
PC        1.40
  
```

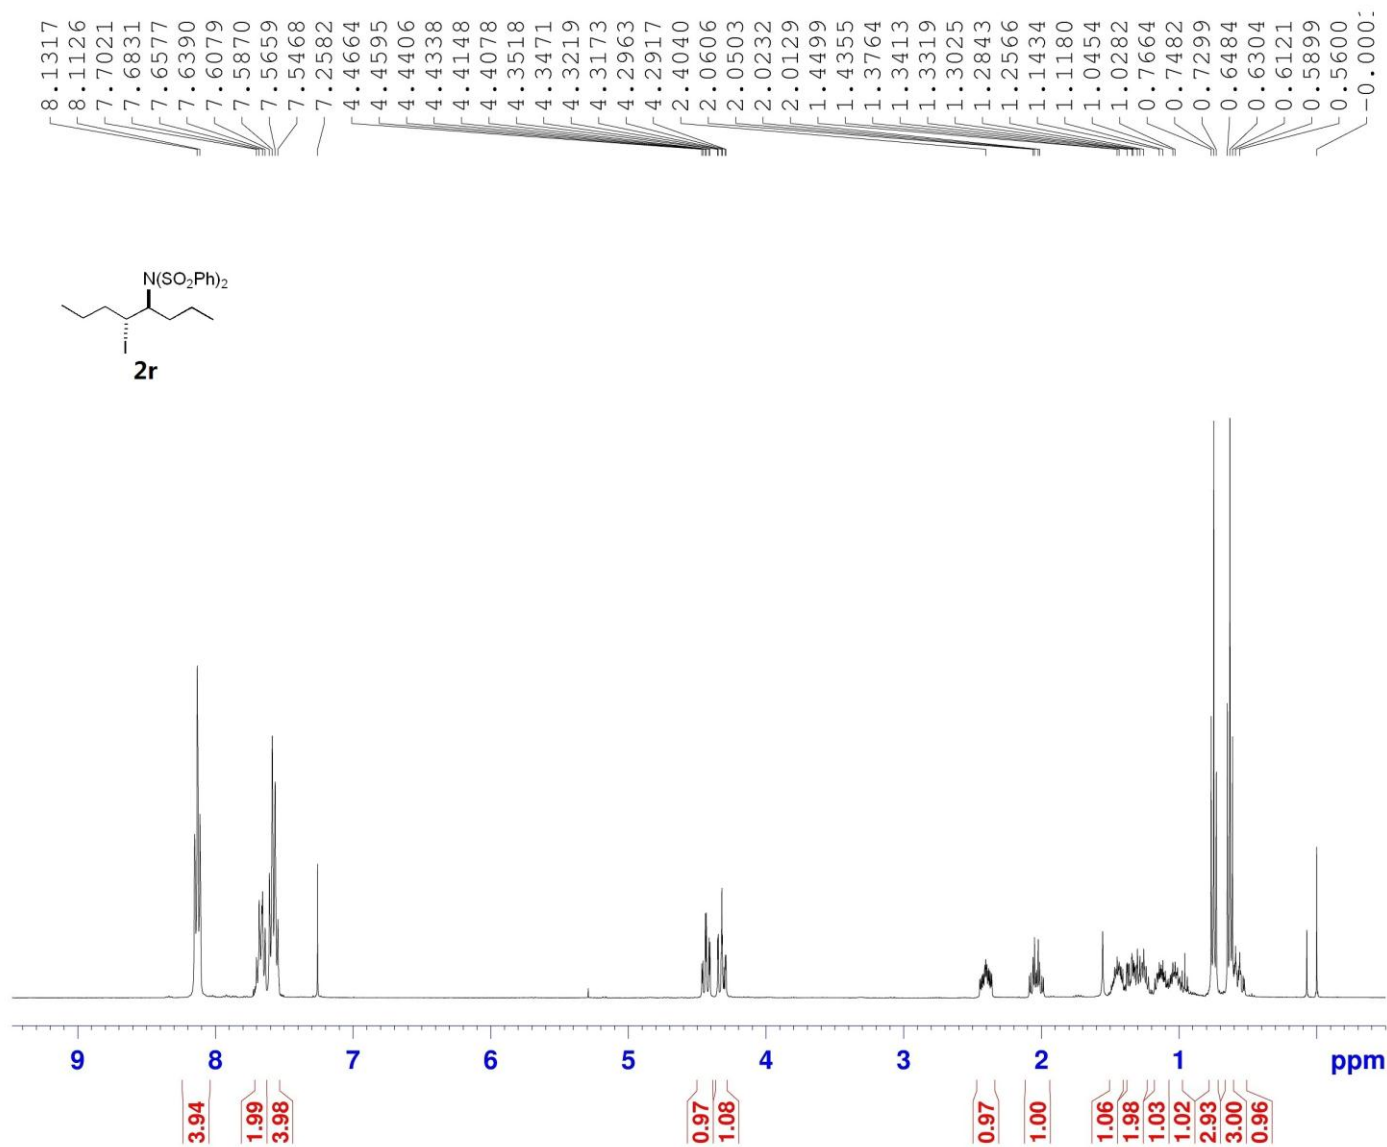

```

NAME      CLJ-WL-L223
EXPNO     1
PROCNO    1
Date_     20180412
Time      7.44
INSTRUM   spect
PROBHD    5 mm PABBO BB/
PULPROG   zg30
TD         65536
SOLVENT   CDCl3
NS         12
DS         0
SWH        8012.820 Hz
FIDRES     0.122266 Hz
AQ         4.0894966 sec
RG         51.19
DW         62.400 usec
DE         6.50 usec
TE         300.0 K
D1         1.00000000 sec
TD0        1
  
```

```

===== CHANNEL f1 =====
SFO1      400.1324710 MHz
NUC1      1H
P1         8.04 usec
SI         65536
SF         400.1300105 MHz
WDW        EM
SSB        0
LB         0.30 Hz
GB         0
PC         1.00
  
```

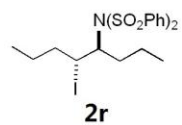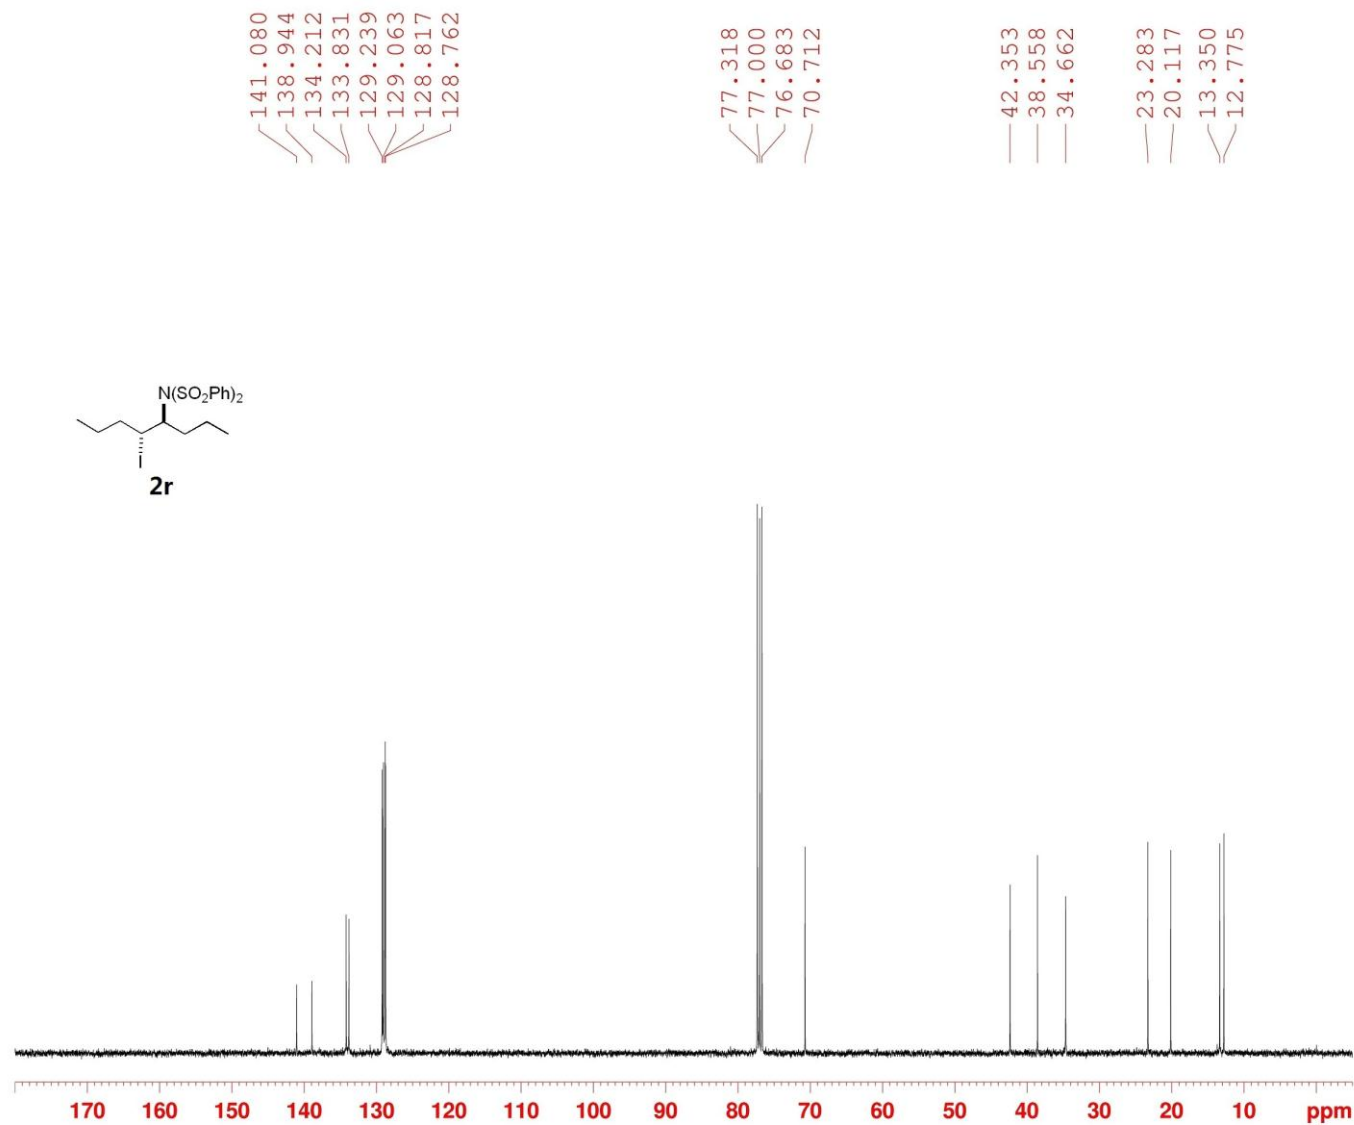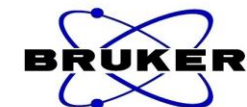

NAME CLJ-WL-L223  
 EXPNO 2  
 PROCNO 1  
 Date\_ 20180412  
 Time 8.14  
 INSTRUM spect  
 PROBHD 5 mm PABBO BB/  
 PULPROG zgpg30  
 TD 65536  
 SOLVENT CDCl3  
 NS 512  
 DS 0  
 SWH 24038.461 Hz  
 FIDRES 0.366798 Hz  
 AQ 1.3631988 sec  
 RG 194.26  
 DW 20.800 usec  
 DE 6.50 usec  
 TE 300.0 K  
 D1 2.00000000 sec  
 D11 0.03000000 sec  
 TD0 1

===== CHANNEL f1 =====  
 SFO1 100.6228293 MHz  
 NUC1 13C  
 P1 8.54 usec  
 SI 32768  
 SF 100.6127720 MHz  
 WDW EM  
 SSB 0  
 LB 1.00 Hz  
 GB 0  
 PC 1.40



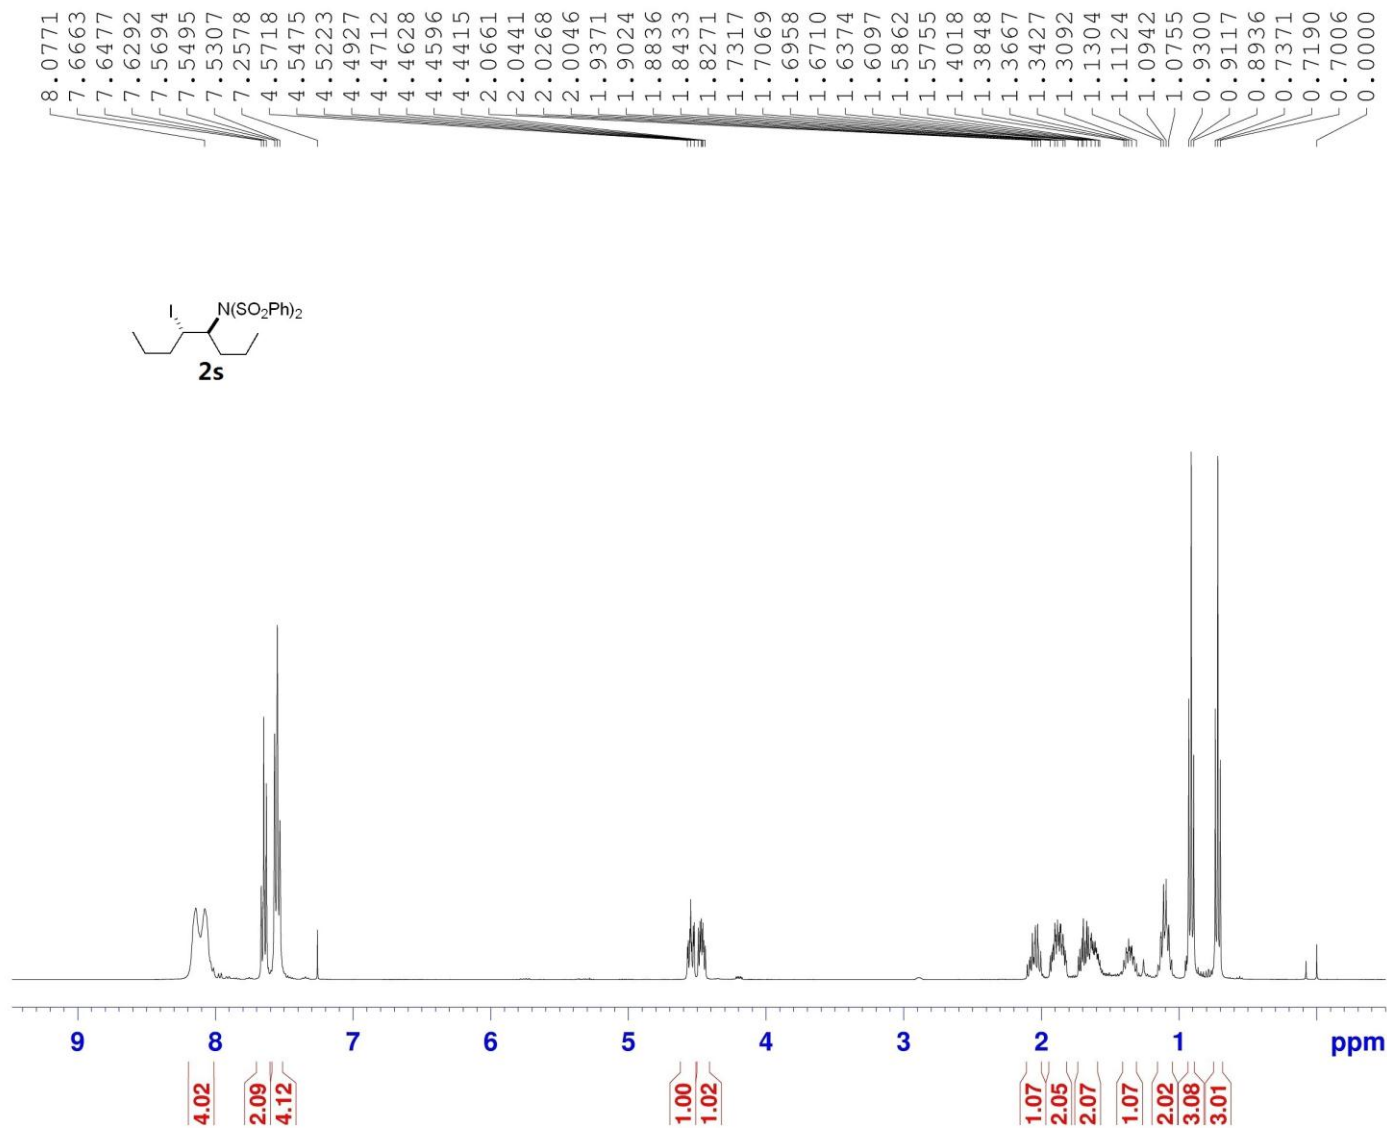

```

NAME      CLJ-WL-L235
EXPNO     2
PROCNO    1
Date_     20180420
Time      7.04
INSTRUM   spect
PROBHD    5 mm PABBO BB/
PULPROG   zg30
TD        65536
SOLVENT   CDCl3
NS         12
DS         0
SWH        8012.820 Hz
FIDRES     0.122266 Hz
AQ         4.0894966 sec
RG         29.13
DW         62.400 usec
DE         6.50 usec
TE         299.9 K
D1         1.00000000 sec
TD0        1
  
```

```

===== CHANNEL f1 =====
SFO1      400.1324710 MHz
NUC1       1H
P1         8.04 usec
SI         65536
SF         400.1300107 MHz
WDW        EM
SSB        0
LB         0.30 Hz
GB         0
PC         1.00
  
```

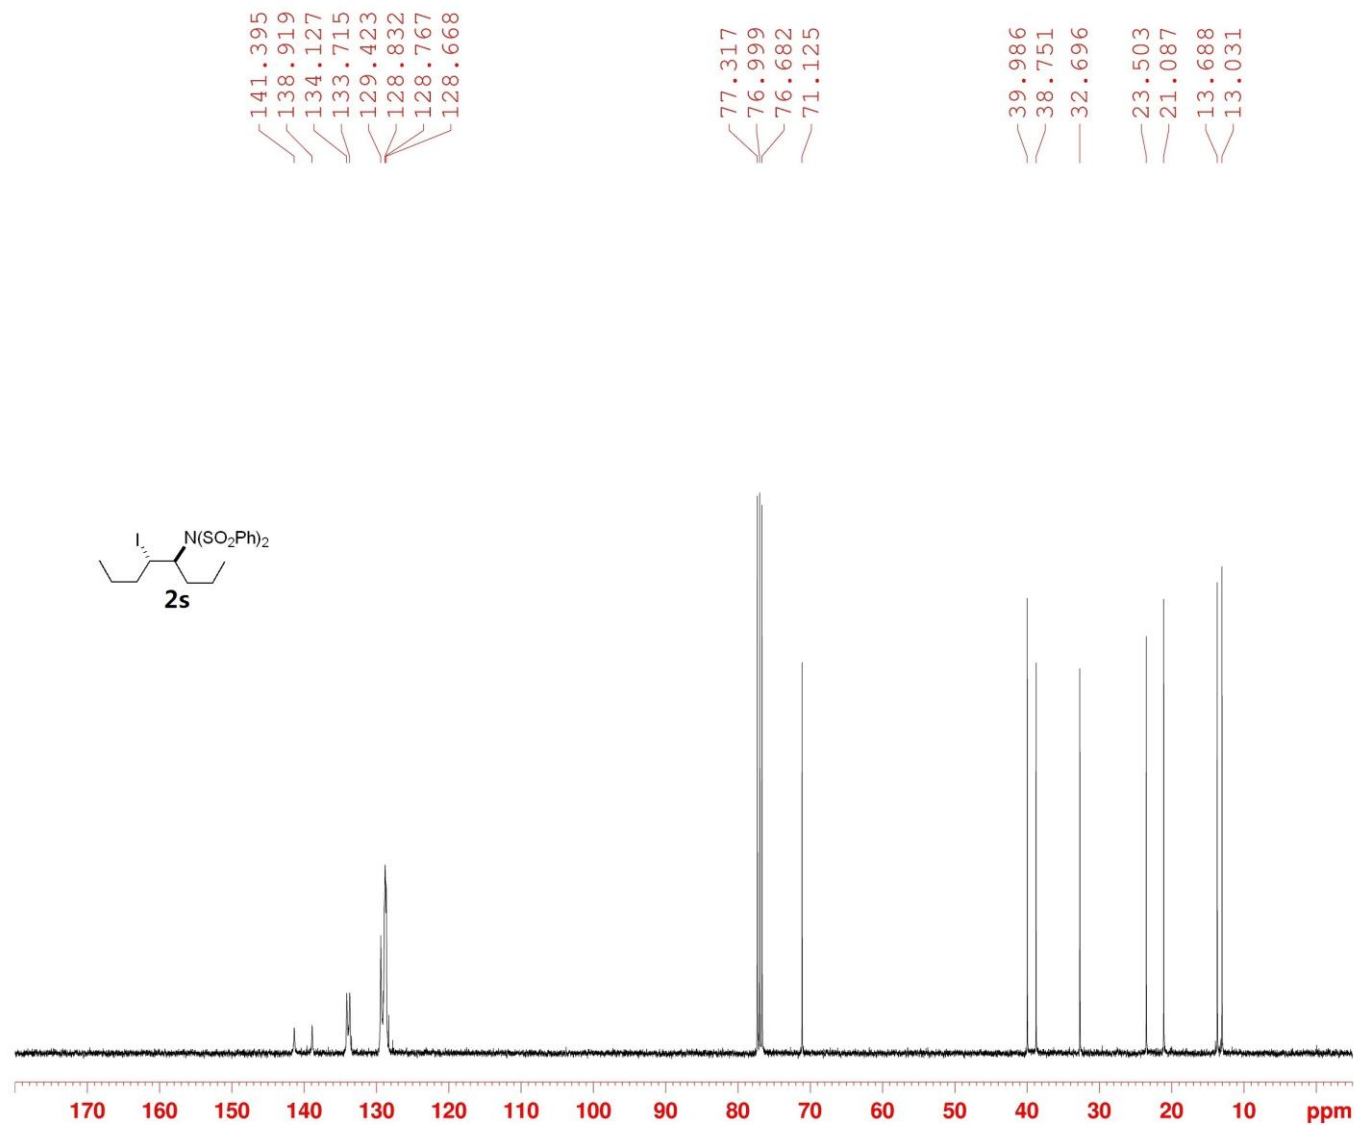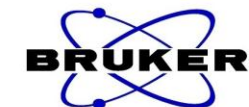

```

NAME      CLJ-WL-L235
EXPNO     1
PROCNO    1
Date_     20180420
Time      7.02
INSTRUM   spect
PROBHD    5 mm PABBO BB/
PULPROG   zgpg30
TD        65536
SOLVENT   CDCl3
NS        512
DS        0
SWH       24038.461 Hz
FIDRES    0.366798 Hz
AQ        1.3631988 sec
RG        194.26
DW        20.800 usec
DE        6.50 usec
TE        300.0 K
D1        2.00000000 sec
D11       0.03000000 sec
TD0       1

```

```

===== CHANNEL f1 =====
SFO1     100.6228293 MHz
NUC1     13C
P1       8.54 usec
SI       32768
SF       100.6127764 MHz
WDW      EM
SSB      0
LB       1.00 Hz
GB       0
PC       1.40

```

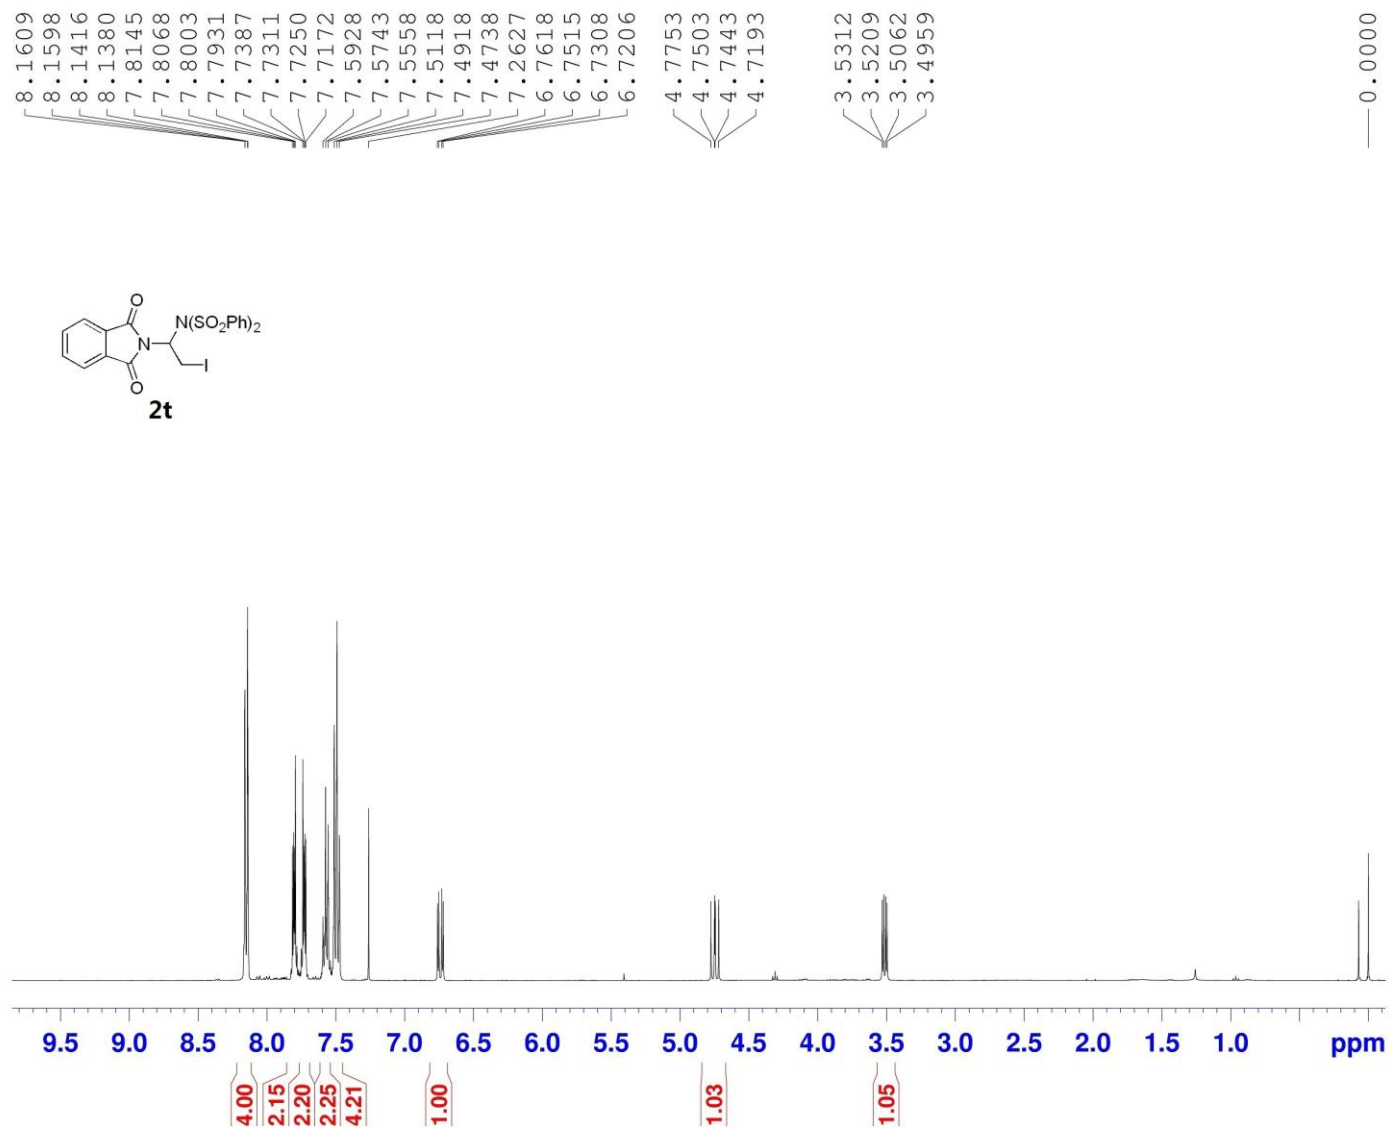

**BRUKER**

NAME 2018-05-24 leibowen-277  
 EXPNO 1  
 PROCNO 1  
 Date\_ 20180524  
 Time 15.27 h  
 INSTRUM spect  
 PROBHD Z116098\_0673 (   
 PULPROG zg30  
 TD 65536  
 SOLVENT CDCl3  
 NS 16  
 DS 2  
 SWH 8012.820 Hz  
 FIDRES 0.244532 Hz  
 AQ 4.0894966 sec  
 RG 80.75  
 DW 62.400 usec  
 DE 6.50 usec  
 TE 296.8 K  
 D1 1.00000000 sec  
 TD0 1  
 SFO1 400.1324708 MHz  
 NUC1 1H  
 P1 10.00 usec  
 SI 65536  
 SF 400.1300086 MHz  
 WDW EM  
 SSB 0  
 LB 0.30 Hz  
 GB 0  
 PC 1.00

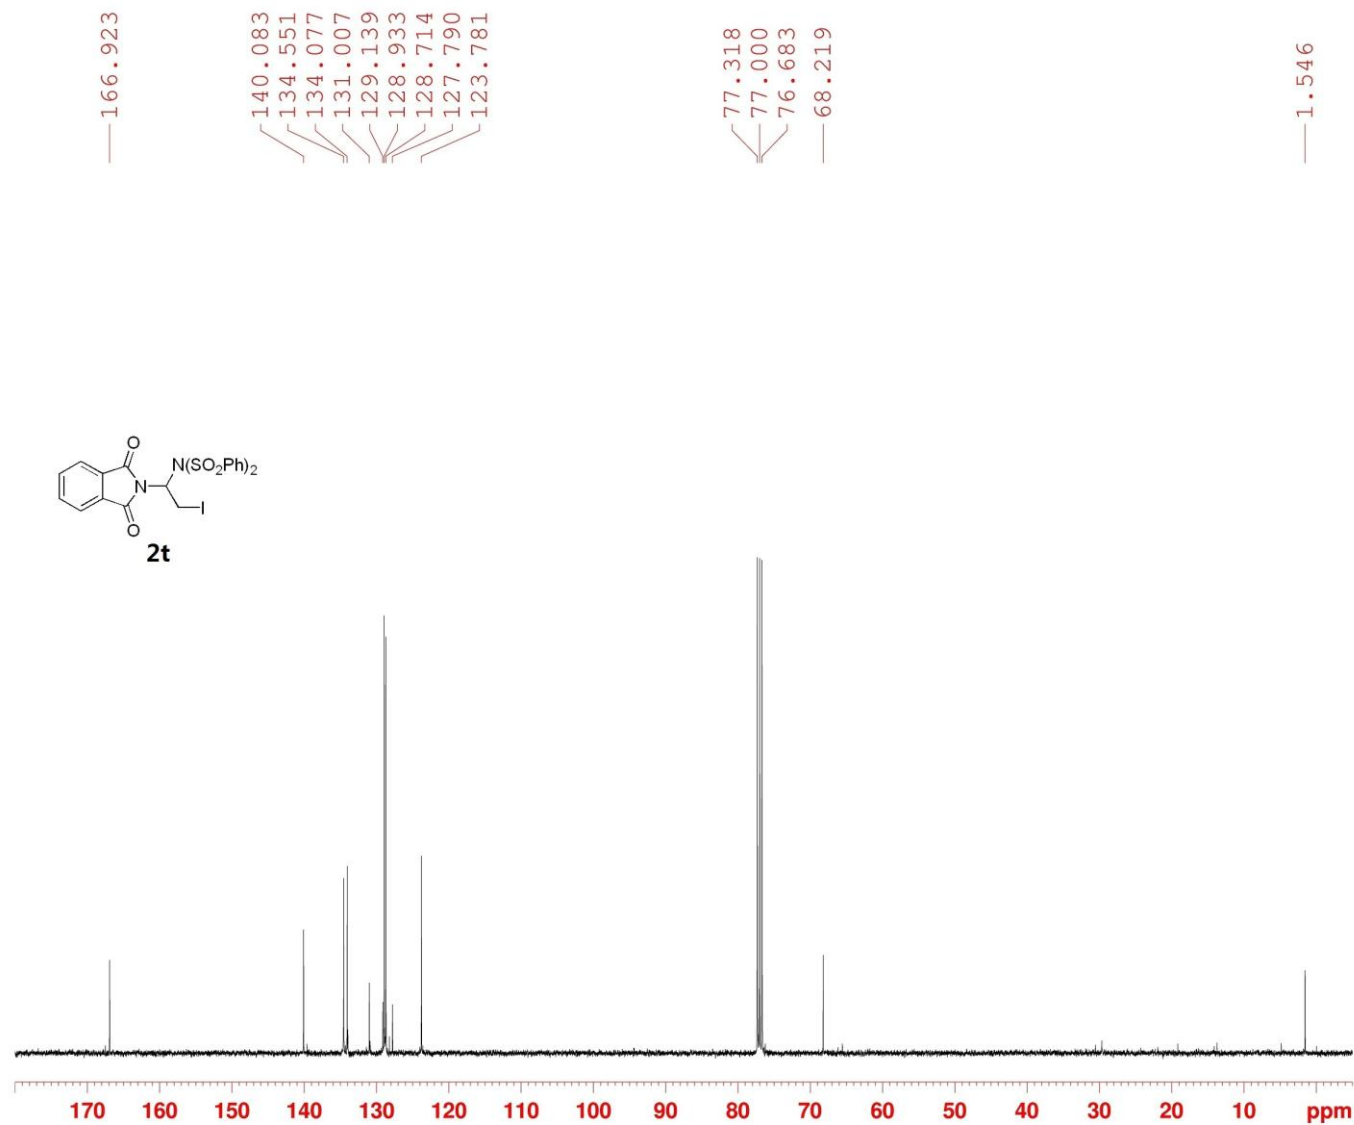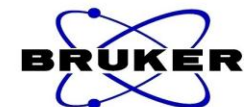

```

NAME      2018-05-29 leibowen-283
EXPNO     1
PROCNO    1
Date_     20180529
Time      17.54 h
INSTRUM   spect
PROBHD    Z116098_0673 (
PULPROG   zgpg30
TD         65536
SOLVENT   CDCl3
NS         512
DS         4
SWH        24038.461 Hz
FIDRES     0.733596 Hz
AQ         1.3631988 sec
RG         203.48
DW         20.800 usec
DE         6.50 usec
TE         297.0 K
D1         2.00000000 sec
D11        0.03000000 sec
TD0        1
SF01       100.6228298 MHz
NUC1       13C
P1         10.00 usec
SI         32768
SF         100.6127738 MHz
WDW        EM
SSB        0
LB         1.00 Hz
GB         0
PC         1.40
  
```

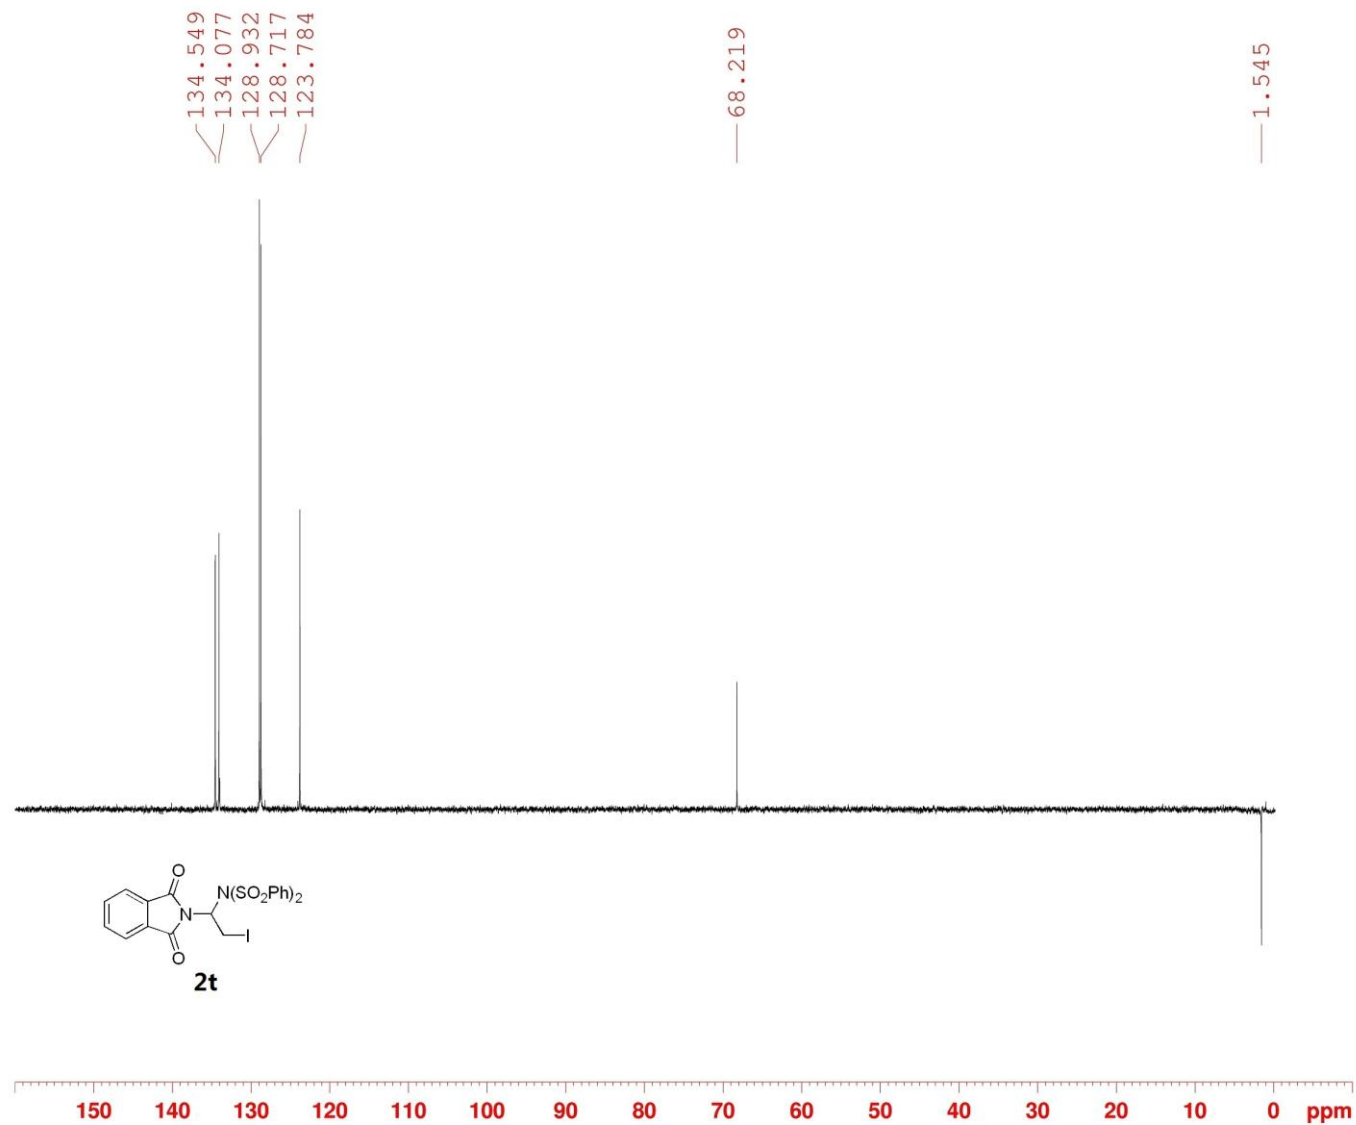

```

NAME      2018-05-30 leibowen-286
EXPNO     1
PROCNO    1
Date_     20180531
Time      3.06 h
INSTRUM   spect
PROBHD    Z116098_0673 (
PULPROG   deptsp135
TD        65536
SOLVENT   CDC13
NS        512
DS        8
SWH       16129.032 Hz
FIDRES    0.492219 Hz
AQ        2.0316660 sec
RG        203.48
DW        31.000 usec
DE        6.50 usec
TE        296.6 K
CNST2     145.0000000
D1        2.00000000 sec
D2        0.00344828 sec
D12       0.00002000 sec
TD0       1
SF01      100.6208175 MHz
NUC1      13C
P1        10.00 usec
P13       2000.00 usec
SI        32768
SF        100.6127738 MHz
WDW       EM
SSB       0
LB        1.00 Hz
GB        0
PC        1.40
  
```

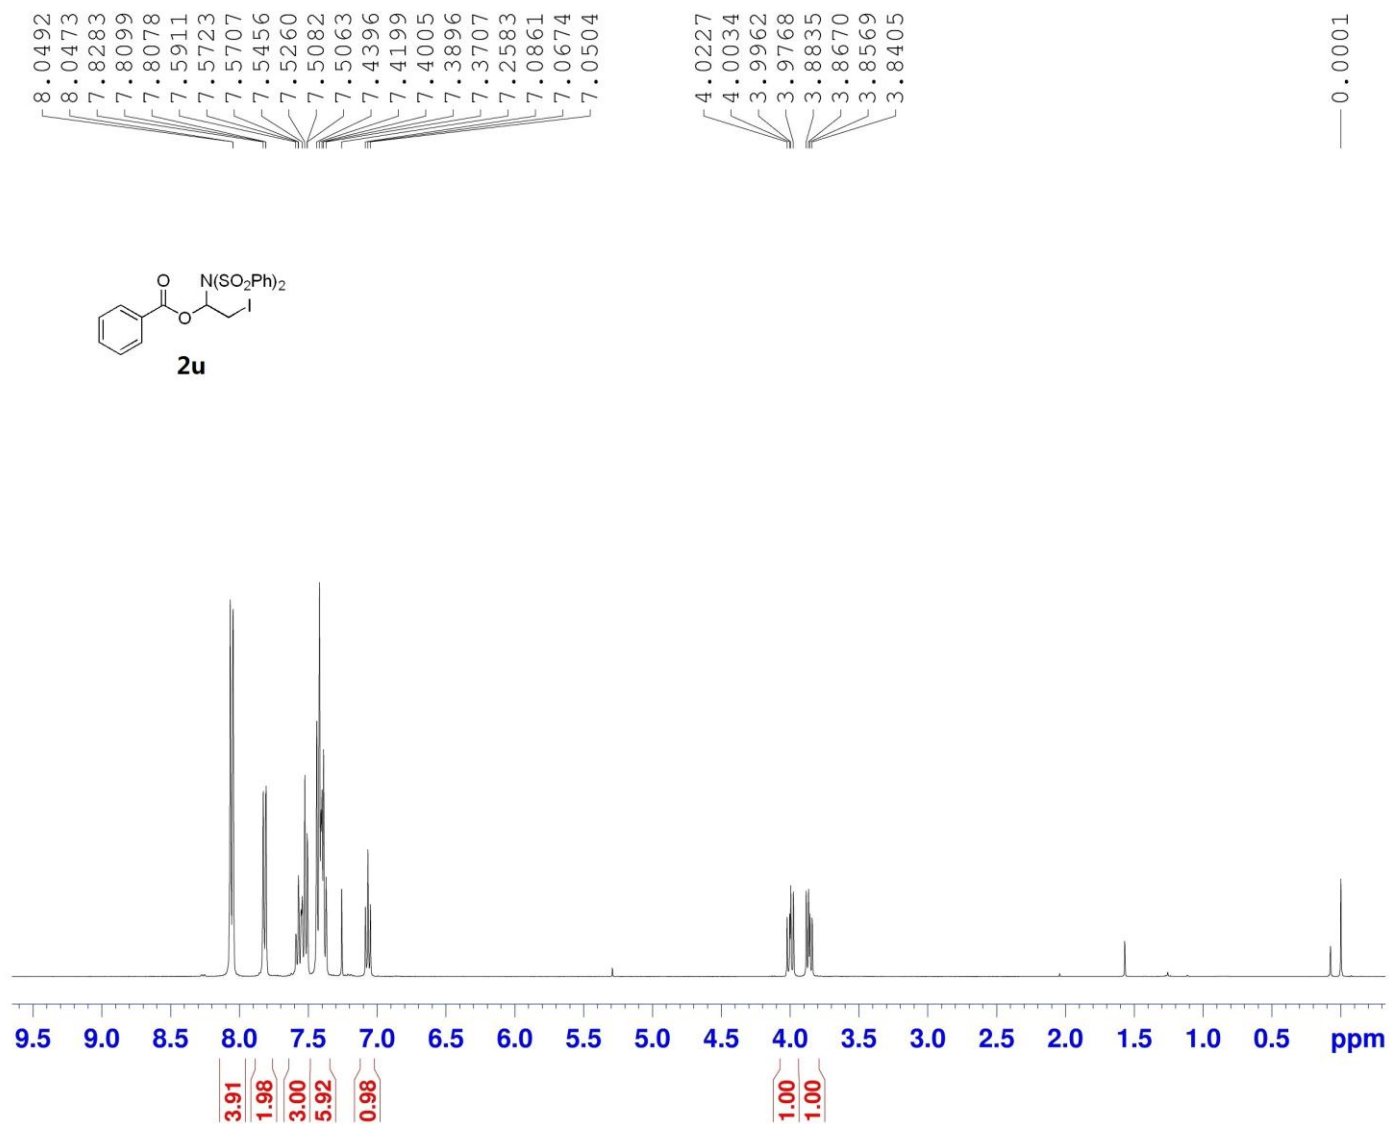

**BRUKER**

```

NAME      CLJ-WL-L273
EXPNO     1
PROCNO    1
Date_     20180519
Time      19.53
INSTRUM   spect
PROBHD    5 mm PABBO BB/
PULPROG   zg30
TD        65536
SOLVENT   CDCl3
NS         12
DS         0
SWH       8012.820 Hz
FIDRES    0.122266 Hz
AQ         4.0894966 sec
RG         70.36
DW         62.400 usec
DE         6.50 usec
TE        300.0 K
D1         1.00000000 sec
TD0        1

===== CHANNEL f1 =====
SFO1      400.1324710 MHz
NUC1       1H
P1         8.04 usec
SI         65536
SF         400.1300110 MHz
WDW        EM
SSB        0
LB         0.30 Hz
GB         0
PC         1.00
  
```

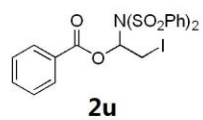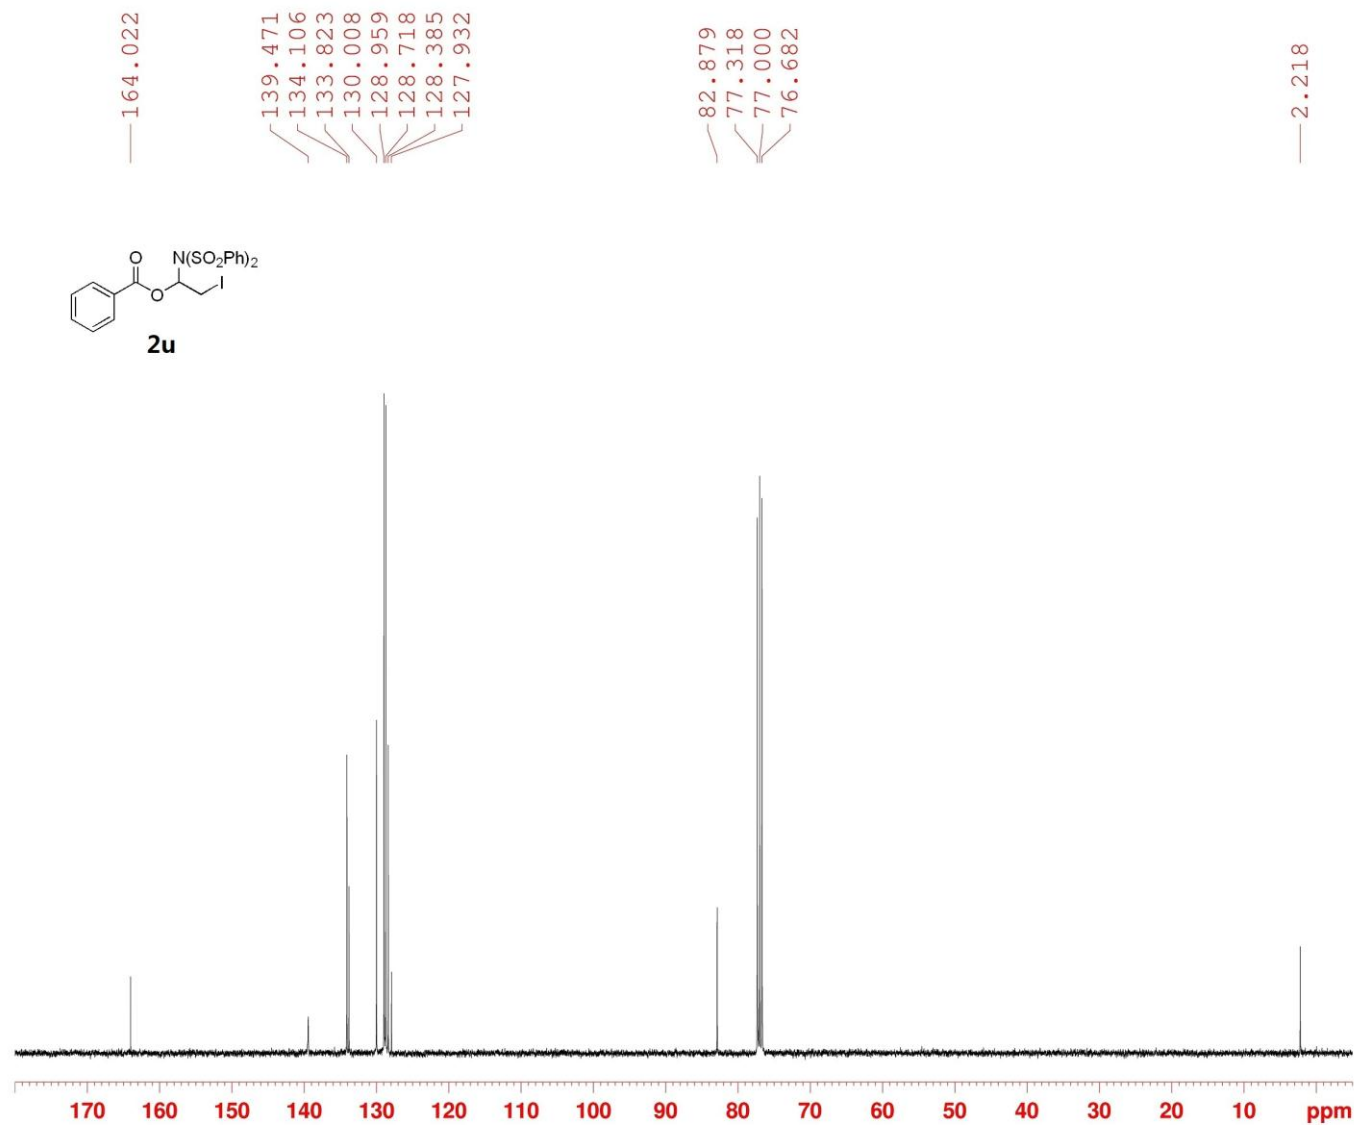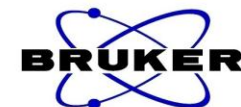

```

NAME      CLJ-WL-L273
EXPNO     2
PROCNO    1
Date_     20180519
Time      20.23
INSTRUM    spect
PROBHD     5 mm PABBO BB/
PULPROG    zgpg30
TD         65536
SOLVENT    CDCl3
NS         512
DS         0
SWH        24038.461 Hz
FIDRES     0.366798 Hz
AQ         1.3631988 sec
RG         194.26
DW         20.800 usec
DE         6.50 usec
TE         299.9 K
D1         2.00000000 sec
D11        0.03000000 sec
TD0        1
  
```

```

===== CHANNEL f1 =====
SFO1      100.6228293 MHz
NUC1      13C
P1        8.54 usec
SI        32768
SF        100.6127723 MHz
WDW        EM
SSB        0
LB         1.00 Hz
GB         0
PC         1.40
  
```

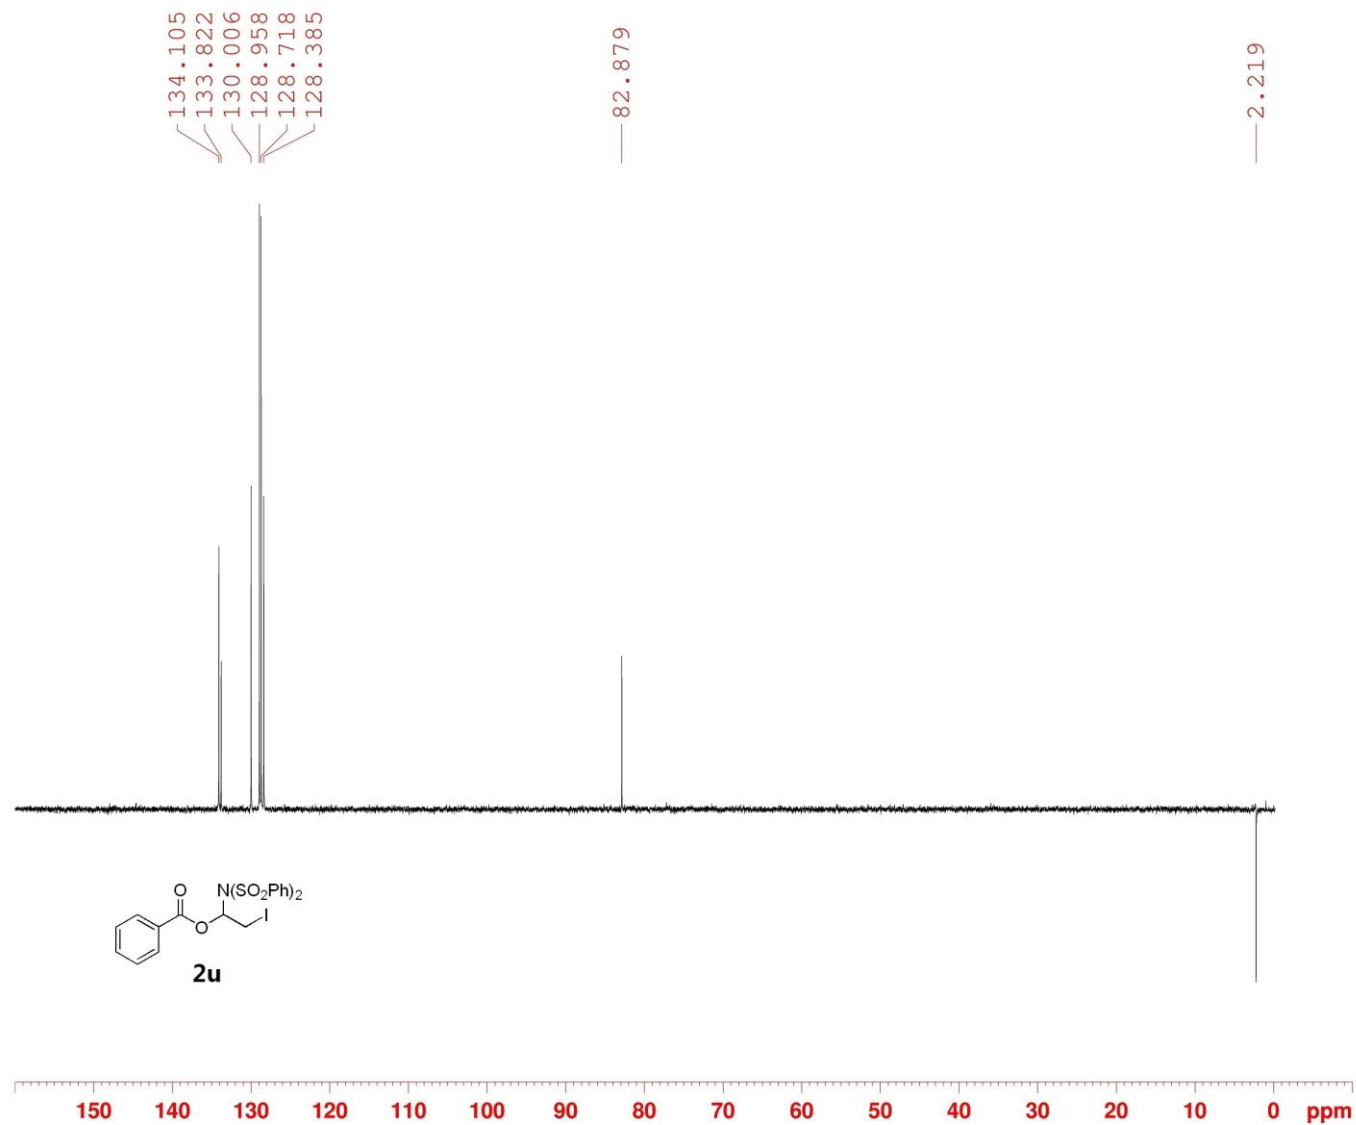

```

NAME      CLJ-WL-L274
EXPNO     1
PROCNO    1
Date_     20180518
Time      19.58
INSTRUM   spect
PROBHD    5 mm PABBO BB/
PULPROG   deptsp135
TD        65536
SOLVENT   CDCl3
NS        256
DS        4
SWH       16129.032 Hz
FIDRES    0.246110 Hz
AQ        2.0316660 sec
RG        194.26
DW        31.000 usec
DE        6.50 usec
TE        300.0 K
CNST2     145.0000000
D1        2.00000000 sec
D2        0.00344828 sec
D12       0.00002000 sec
TD0       1
  
```

```

===== CHANNEL f1 =====
SFO1     100.6208171 MHz
NUC1      13C
P1       8.54 usec
P13      2000.00 usec
SI       32768
SF       100.6127725 MHz
WDW      EM
SSB      0
LB       1.00 Hz
GB       0
PC       1.40
  
```



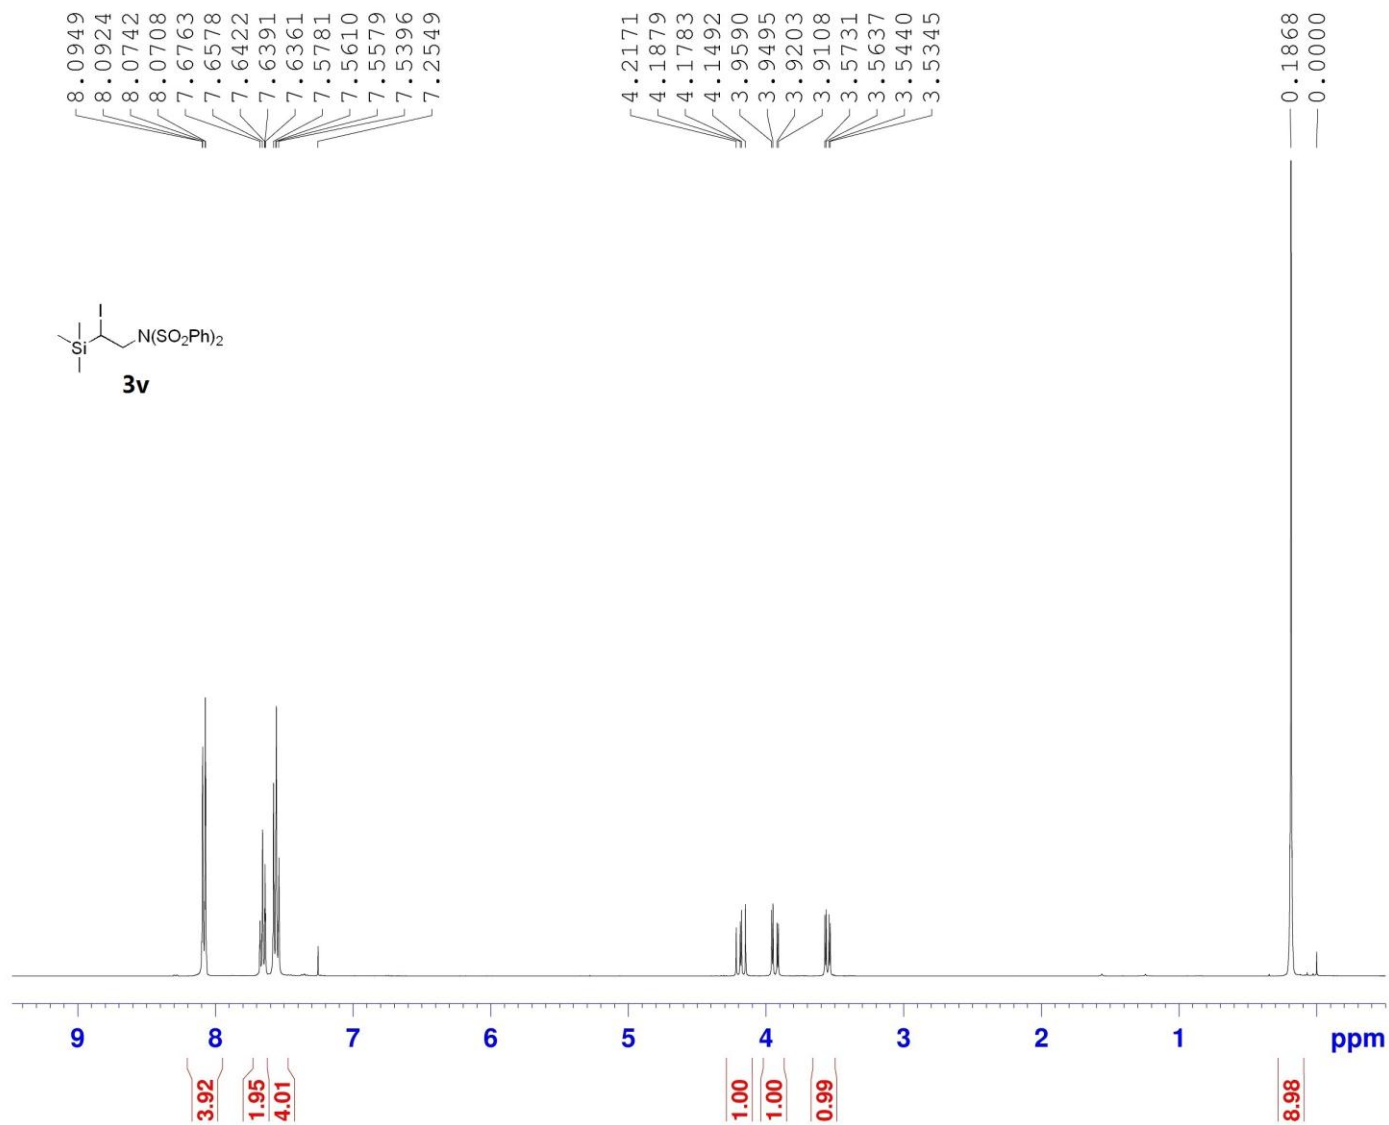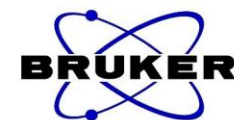

```

NAME      CLJ-WL-L247
EXPNO     1
PROCNO    1
Date_     20180502
Time      18.17
INSTRUM   spect
PROBHD    5 mm PABBO BB/
PULPROG   zg30
TD        65536
SOLVENT   CDCl3
NS         12
DS         0
SWH        8012.820 Hz
FIDRES     0.122266 Hz
AQ         4.0894966 sec
RG         21.11
DW         62.400 usec
DE         6.50 usec
TE         300.0 K
D1         1.00000000 sec
TD0        1
  
```

```

===== CHANNEL f1 =====
SFO1      400.1324710 MHz
NUC1       1H
P1         8.04 usec
SI         65536
SF         400.1300118 MHz
WDW        EM
SSB        0
LB         0.30 Hz
GB         0
PC         1.00
  
```

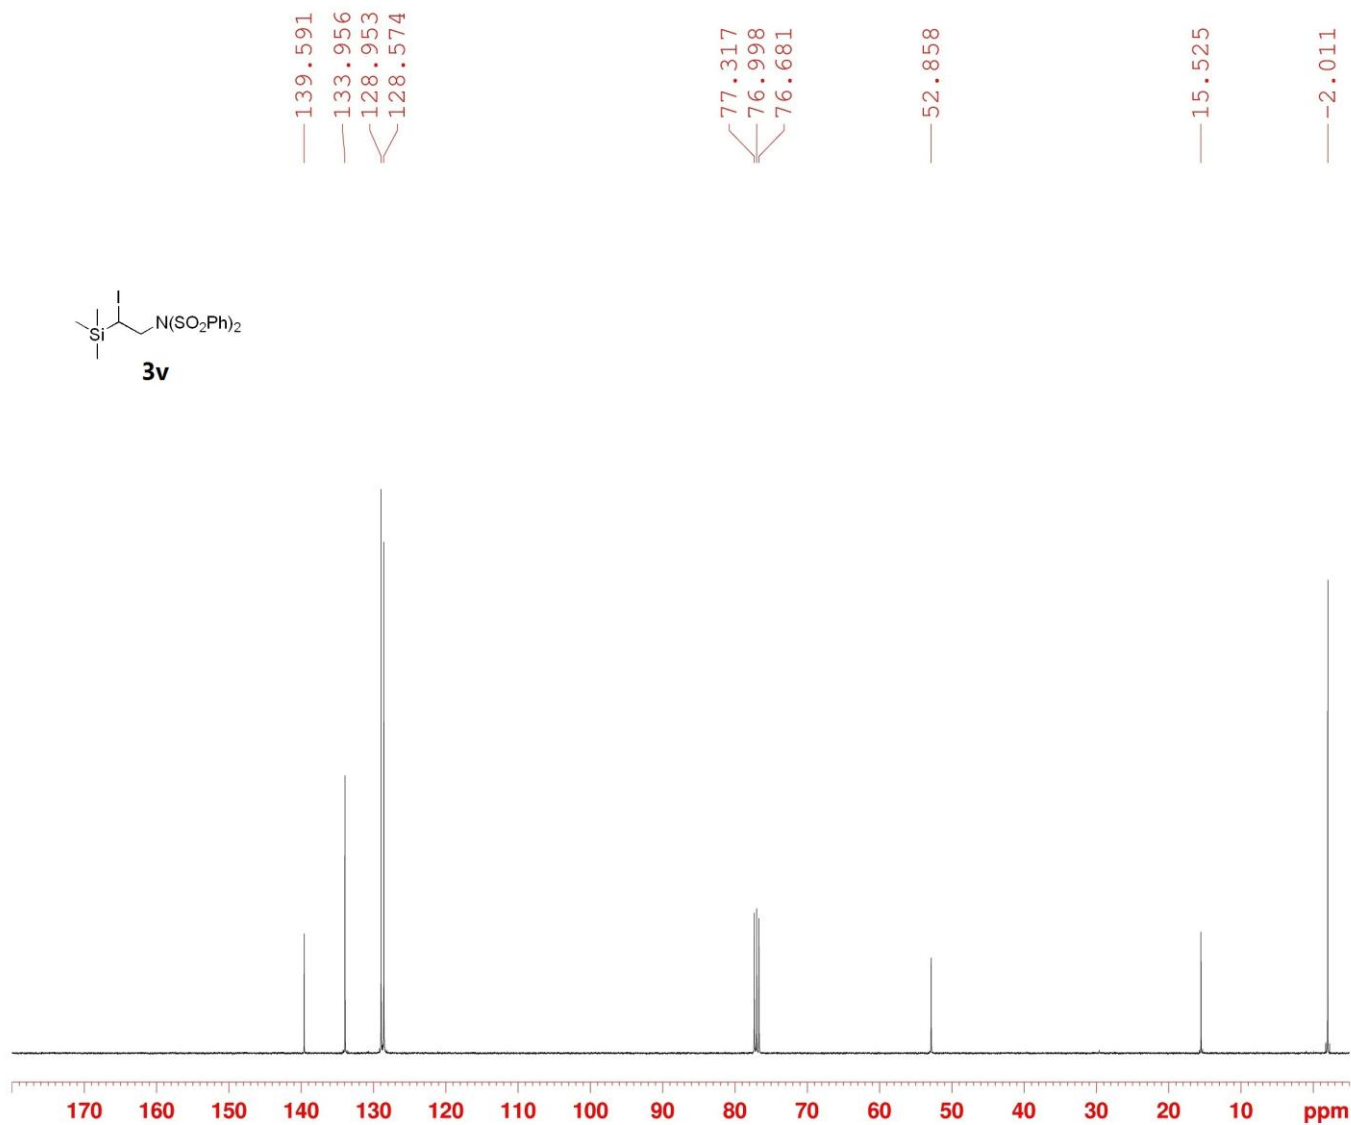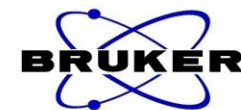

NAME CLJ-WL-L248  
 EXPNO 1  
 PROCNO 1  
 Date\_ 20180504  
 Time 22.53  
 INSTRUM spect  
 PROBHD 5 mm PABBO BB/  
 PULPROG zgpg30  
 TD 65536  
 SOLVENT CDCl3  
 NS 512  
 DS 0  
 SWH 24038.461 Hz  
 FIDRES 0.366798 Hz  
 AQ 1.3631988 sec  
 RG 194.26  
 DW 20.800 usec  
 DE 6.50 usec  
 TE 300.0 K  
 D1 2.00000000 sec  
 D11 0.03000000 sec  
 TD0 1

===== CHANNEL f1 =====  
 SFO1 100.6228293 MHz  
 NUC1 13C  
 P1 8.54 usec  
 SI 32768  
 SF 100.6127778 MHz  
 WDW EM  
 SSB 0  
 LB 1.00 Hz  
 GB 0  
 PC 1.40

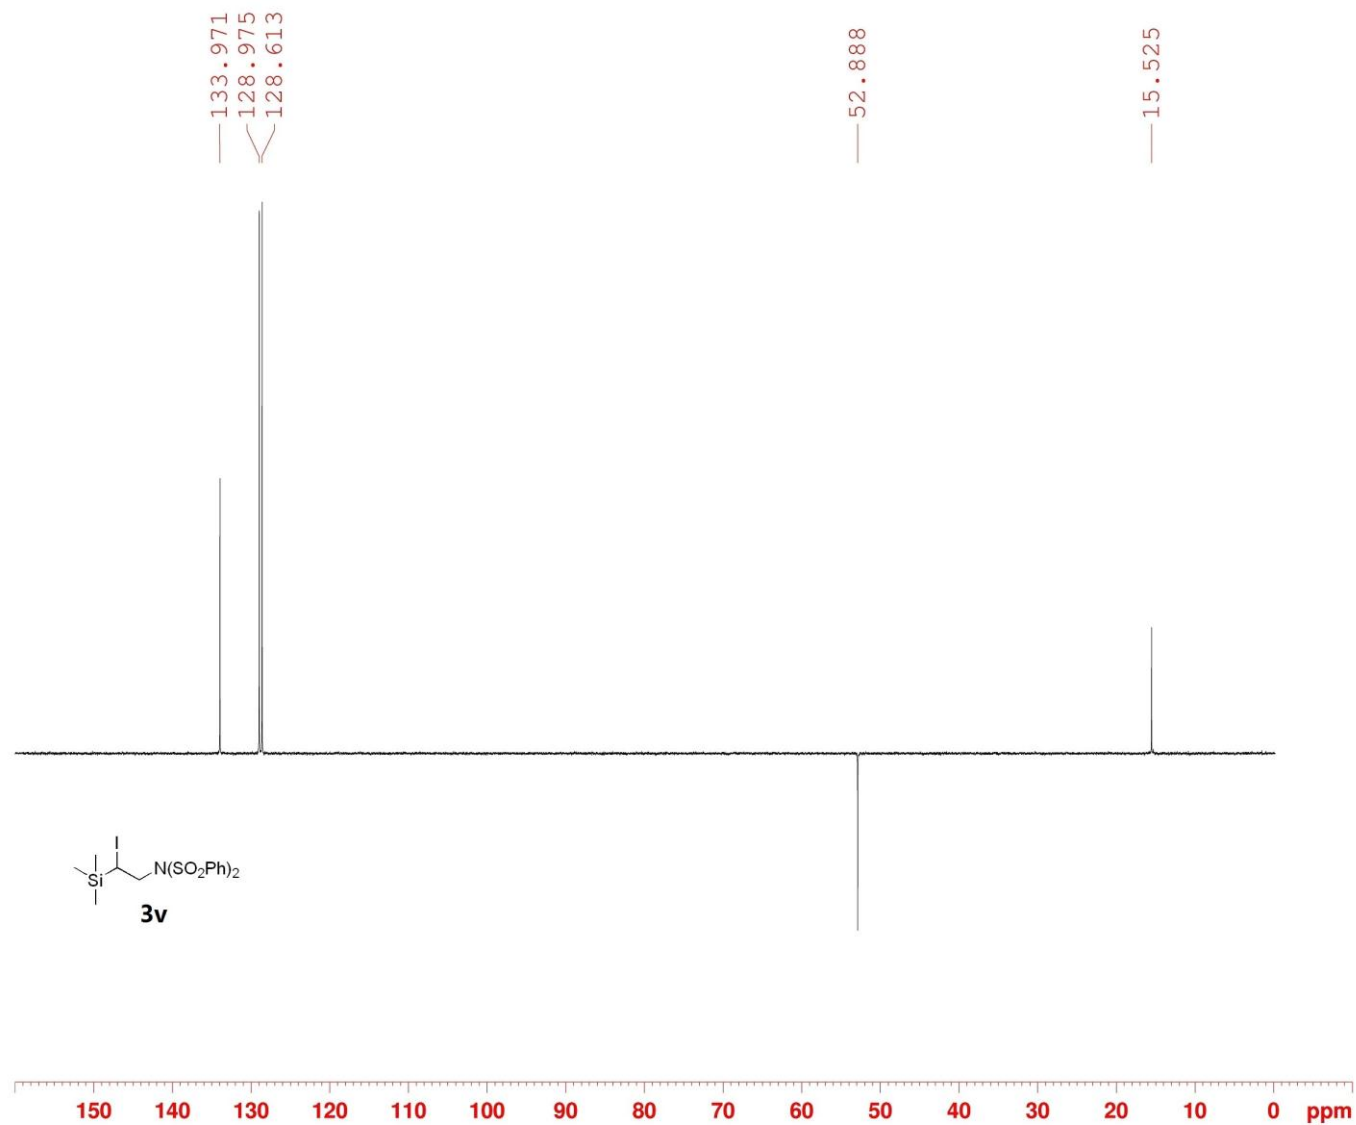

```

NAME      CLJ-WL-L272
EXPNO     1
PROCNO    1
Date_     20180517
Time      19.37
INSTRUM   spect
PROBHD    5 mm PABBO BB/
PULPROG   deptsp135
TD        65536
SOLVENT   CDCl3
NS        256
DS        4
SWH       16129.032 Hz
FIDRES    0.246110 Hz
AQ        2.0316660 sec
RG        194.26
DW        31.000 usec
DE        6.50 usec
TE        300.0 K
CNST2     145.0000000
D1        2.00000000 sec
D2        0.00344828 sec
D12       0.00002000 sec
TD0       1
  
```

```

===== CHANNEL f1 =====
SFO1     100.6208171 MHz
NUC1      13C
P1        8.54 usec
P13       2000.00 usec
SI        32768
SF        100.6127746 MHz
WDW       EM
SSB       0
LB        1.00 Hz
GB        0
PC        1.40
  
```

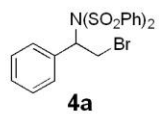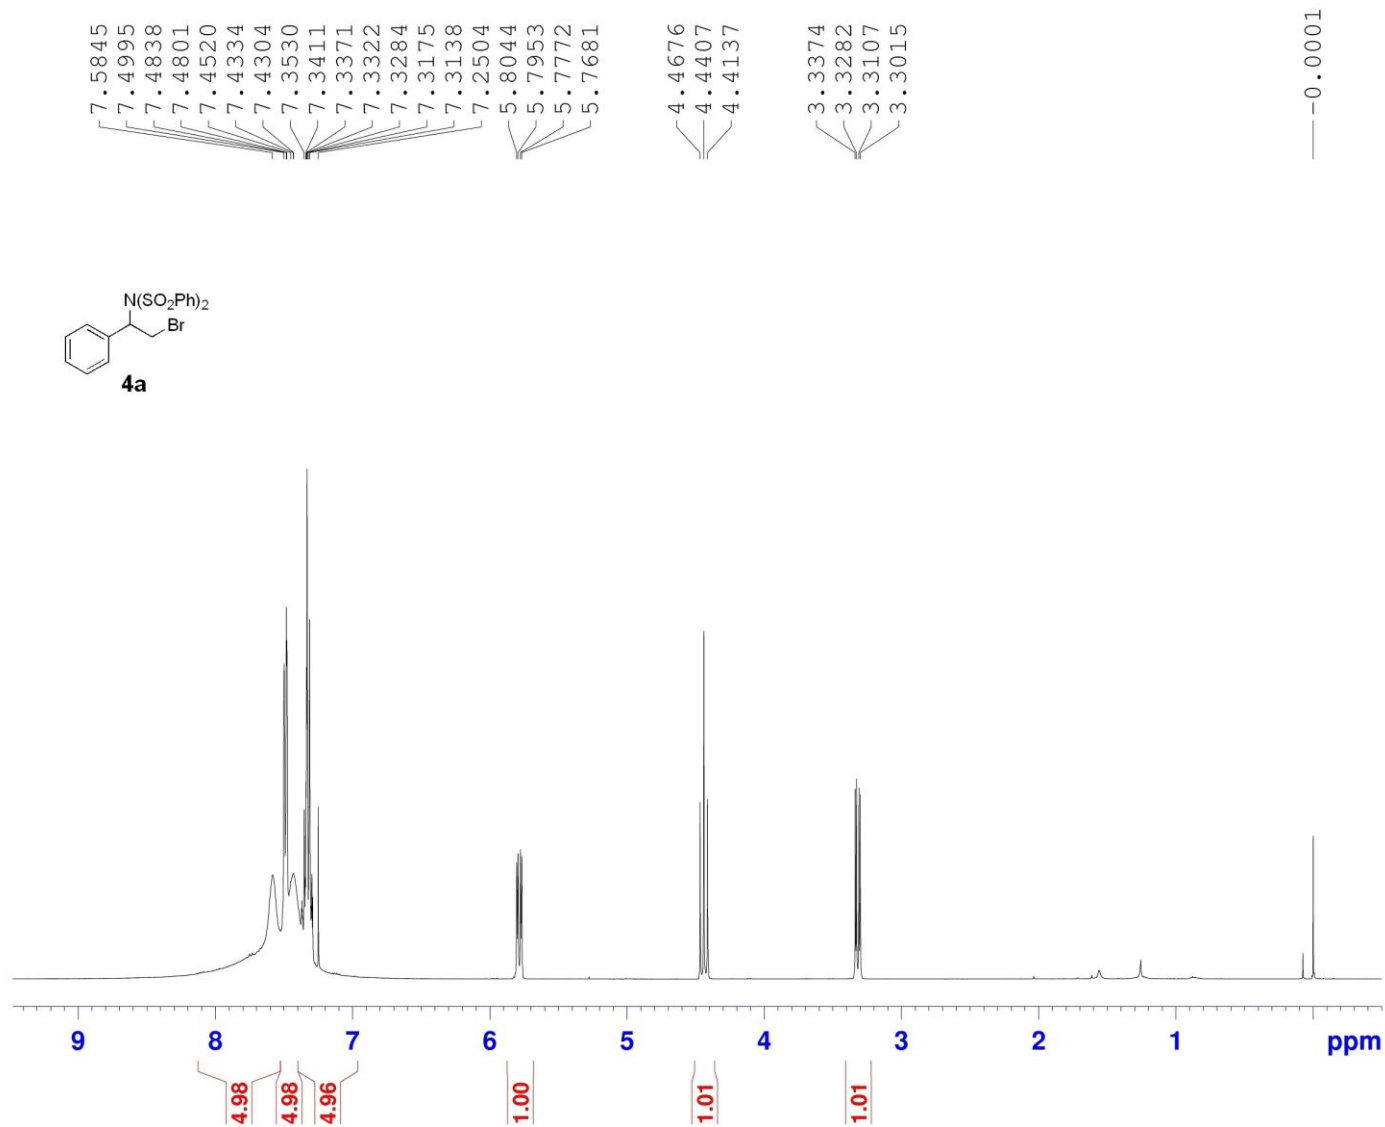

— -0.0001



NAME CLJ-WL-M071  
 EXPNO 2  
 PROCNO 1  
 Date\_ 20180621  
 Time\_ 4.11  
 INSTRUM spect  
 PROBHD 5 mm PABBO BB/  
 PULPROG zg30  
 TD 65536  
 SOLVENT CDCl3  
 NS 12  
 DS 0  
 SWH 8012.820 Hz  
 FIDRES 0.122266 Hz  
 AQ 4.0894966 sec  
 RG 51.19  
 DW 62.400 usec  
 DE 6.50 usec  
 TE 299.9 K  
 D1 1.00000000 sec  
 TD0 1

===== CHANNEL f1 =====  
 SF01 400.1324710 MHz  
 NUC1 1H  
 P1 8.04 usec  
 S1 65536  
 SF 400.1300134 MHz  
 WDW EM  
 SSB 0  
 LB 0.30 Hz  
 GB 0  
 PC 1.00

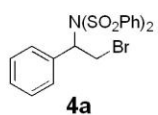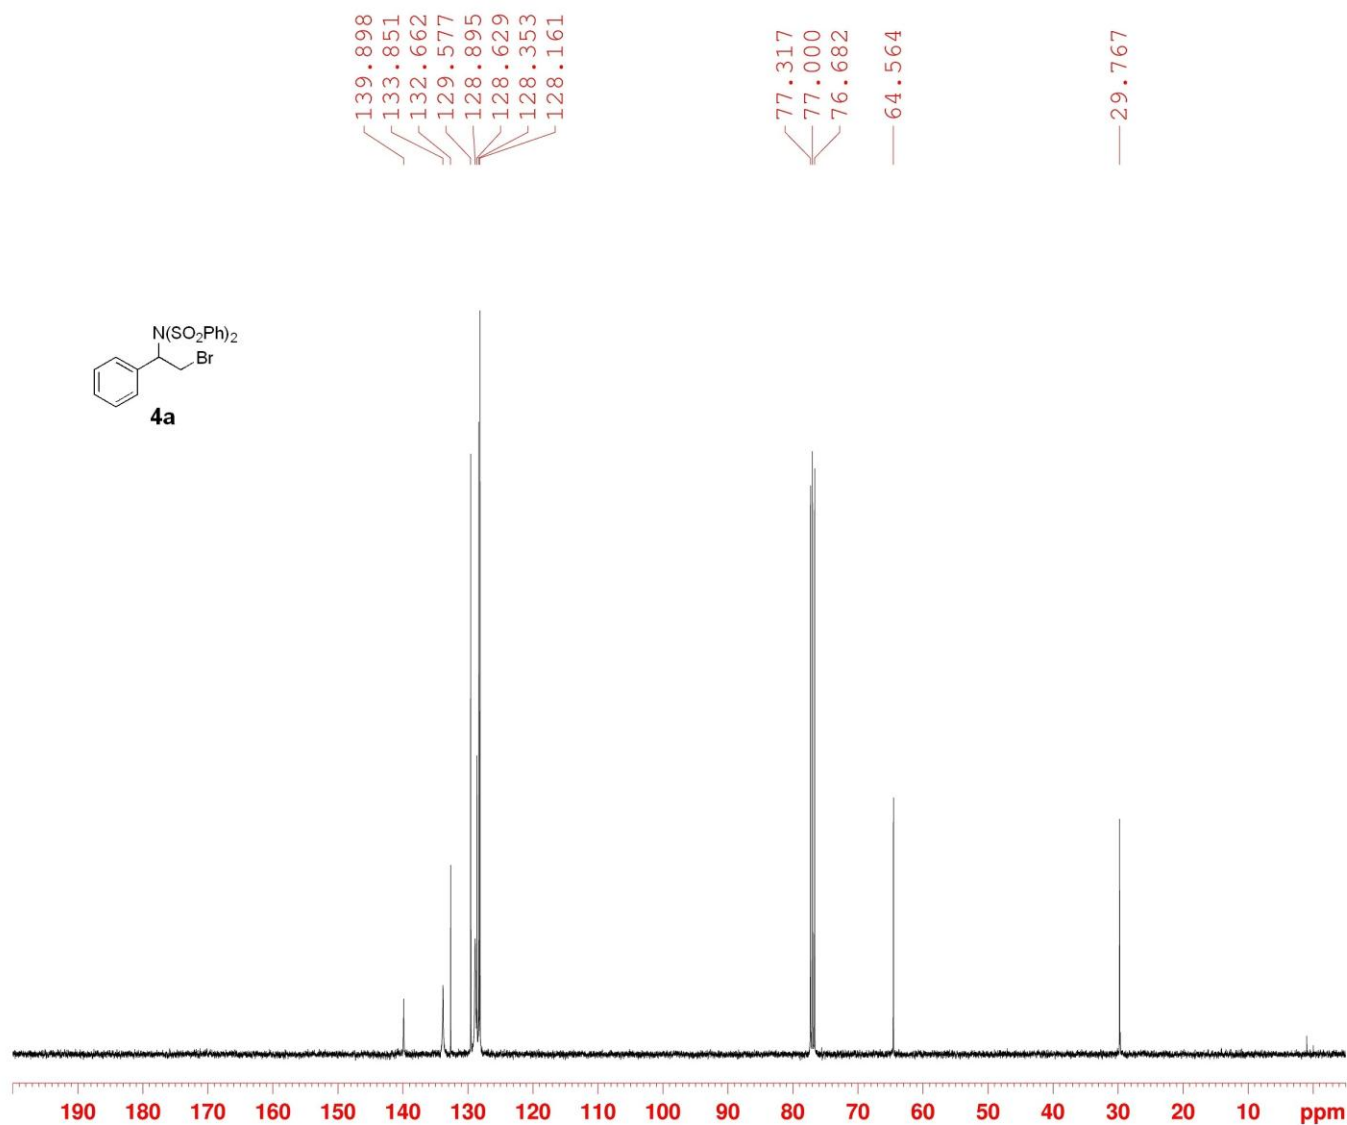

```

NAME      CLJ-WL-M071
EXPNO     1
PROCNO    1
Date_     20180621
Time      4.09
INSTRUM   spect
PROBHD    5 mm PABBO BB/
PULPROG   zgpg30
TD        65536
SOLVENT   CDCl3
NS        512
DS        0
SWH       24038.461 Hz
FIDRES    0.366798 Hz
AQ        1.3631988 sec
RG        194.26
DW        20.800 usec
DE        6.50 usec
TE        300.1 K
D1        2.00000000 sec
D11       0.03000000 sec
TD0       1
  
```

```

===== CHANNEL f1 =====
SFO1     100.6228293 MHz
NUC1      13C
P1        8.54 usec
SI        32768
SF        100.6127738 MHz
WDW       EM
SSB       0
LB        1.00 Hz
GB        0
PC        1.40
  
```

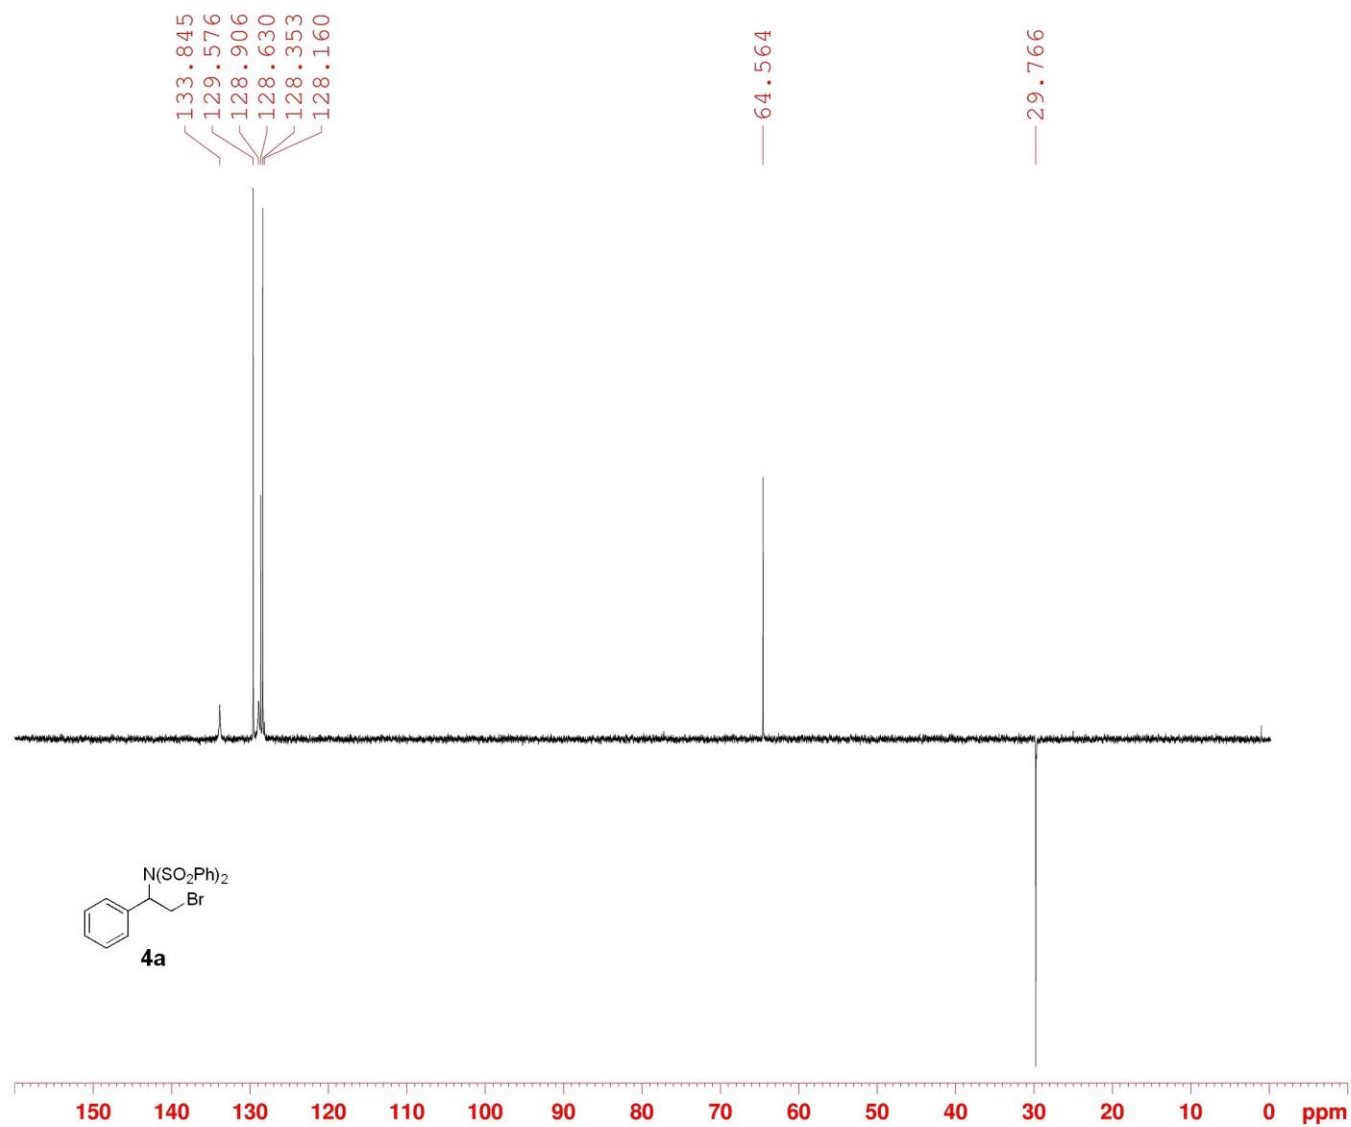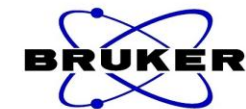

```

NAME      CLJ-WL-M076
EXPNO     1
PROCNO    1
Date_     20180626
Time      20.46
INSTRUM   spect
PROBHD    5 mm PABBO BB/
PULPROG   deptsp135
TD        65536
SOLVENT   CDCl3
NS        256
DS        4
SWH       16129.032 Hz
FIDRES    0.246110 Hz
AQ        2.0316660 sec
RG        194.26
DW        31.000 usec
DE        6.50 usec
TE        300.0 K
CNST2     145.0000000
D1        2.00000000 sec
D2        0.00344828 sec
D12       0.00002000 sec
TD0       1
  
```

```

===== CHANNEL f1 =====
SFO1    100.6208171 MHz
NUC1     13C
P1       8.54 usec
P13     2000.00 usec
SI       32768
SF     100.6127738 MHz
WDW      EM
SSB      0
LB       1.00 Hz
GB       0
PC       1.40
  
```

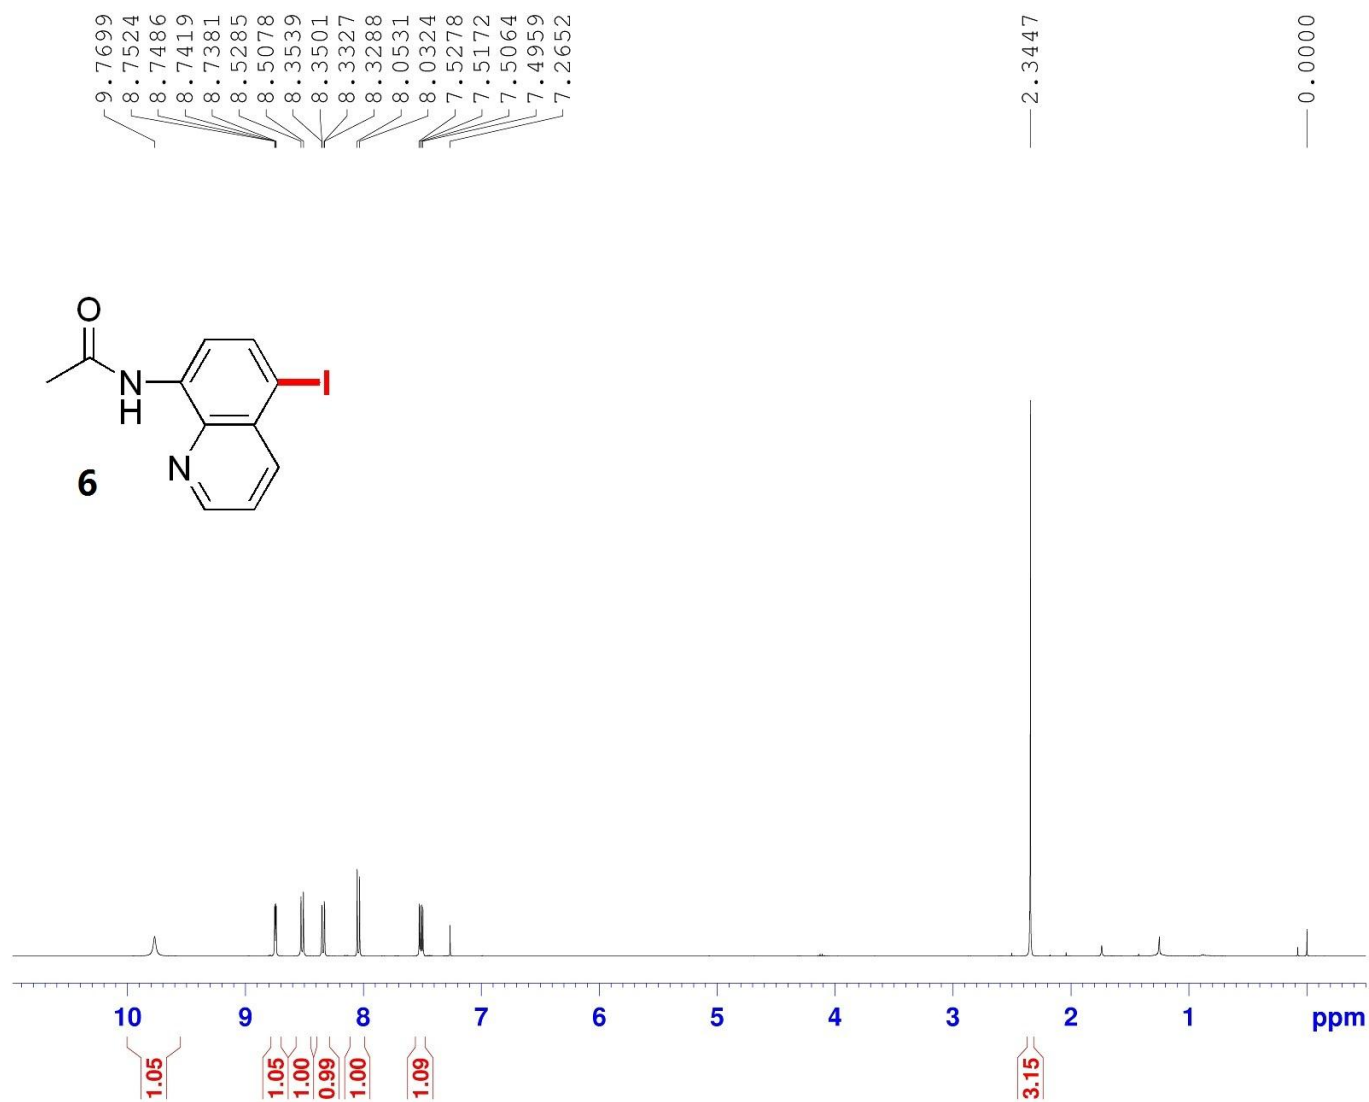

**BRUKER**

```

NAME      CLJ-WL-S098
EXPNO     2
PROCNO    1
Date_     20180420
Time      2.05
INSTRUM   spect
PROBHD    5 mm PABBO BB/
PULPROG   zg30
TD        65536
SOLVENT   CDCl3
NS        12
DS        0
SWH       8012.820 Hz
FIDRES    0.122266 Hz
AQ        4.0894966 sec
RG        70.36
DW        62.400 usec
DE        6.50 usec
TE        299.9 K
D1        1.00000000 sec
TD0       1

===== CHANNEL f1 =====
SF01      400.1324710 MHz
NUC1       1H
P1         8.04 usec
SI         65536
SF         400.1300077 MHz
WDW        EM
SSB        0
LB         0.30 Hz
GB         0
PC         1.00
  
```

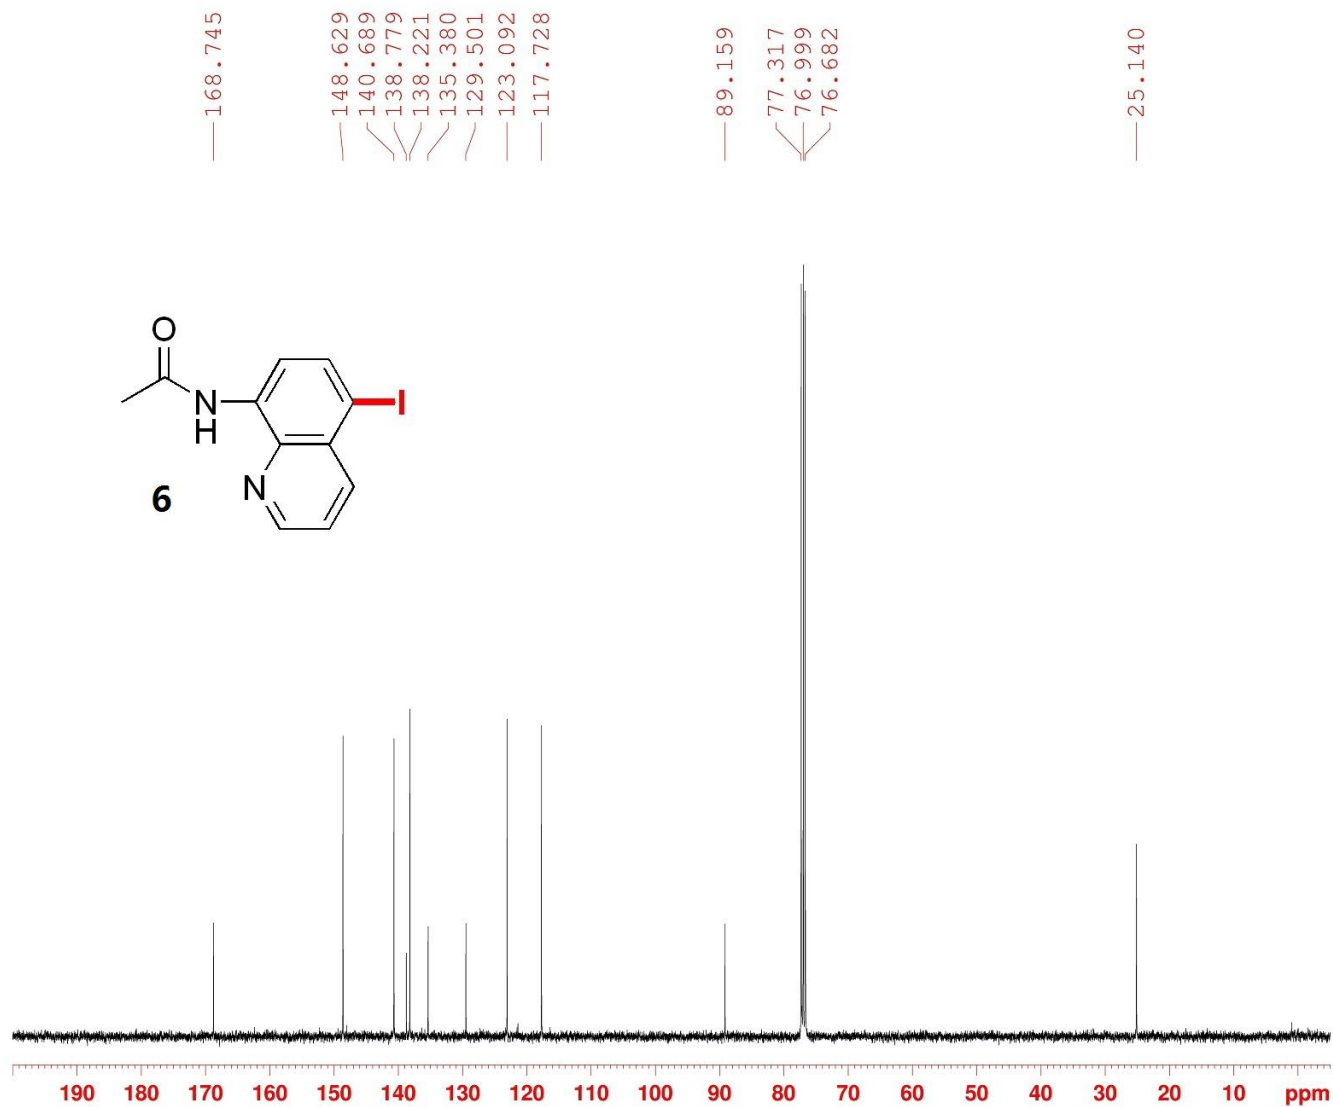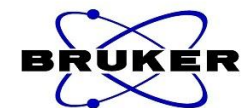

```

NAME      CLJ-WL-S098
EXPNO     4
PROCNO    1
Date_     20180425
Time      20.22
INSTRUM   spect
PROBHD    5 mm PABBO BB/
PULPROG   zgpg30
TD        65536
SOLVENT   CDCl3
NS        512
DS        0
SWH       24038.461 Hz
FIDRES    0.366798 Hz
AQ        1.3631988 sec
RG        194.26
DW        20.800 usec
DE        6.50 usec
TE        300.0 K
D1        2.00000000 sec
D11       0.03000000 sec
TD0       1
  
```

```

===== CHANNEL f1 =====
SFO1      100.6228293 MHz
NUC1      13C
P1        8.54 usec
SI        32768
SF        100.6127727 MHz
WDW       EM
SSB       0
LB        1.00 Hz
GB        0
PC        1.40
  
```
